# Supplementary material
Source: publisher figshare collection journal article supplement (https://tandf.figshare.com/ndownloader/files/28102116)
Supplement: Supplementary file 1 [file 28102116]

## Sheet: 570 Ma FC
Liquid Thermodynamic Data
Pressure (bars)	Temperature (oC)	F	phi	S	H	V	dVdP*10^6	dVdT*10^6	Cp	mass	fO2-(QFM-0.3)	rhol	rhos	viscosity	aH2O
1700	1100	1	1	274.747	-1.22653e+06	41.6198	-583.825	4951.8	137.781	99.2073	0	2.38365	0	3.438	0.494868
1700	1090	1	1	273.741	-1.22792e+06	41.5711	-581.487	4943.04	137.75	99.2081	0	2.38647	0	3.496	0.493829
1700	1080	1	1	272.728	-1.22931e+06	41.5224	-579.155	4934.12	137.719	99.209	0	2.38929	0	3.554	0.49281
1700	1070	1	1	271.708	-1.2307e+06	41.4739	-576.829	4925.05	137.686	99.21	0	2.3921	0	3.613	0.491814
1700	1060	0.994146	0.996982	270.485	-1.23252e+06	41.4306	-574.183	4889.59	137.439	99.2203	0	2.38804	4.6448	3.713	0.491448
1700	1050	0.994021	0.996926	268.05	-1.23092e+06	41.2632	-571.522	4850.57	136.649	98.6512	0	2.38381	4.65044	3.816	0.491168
1700	1040	0.988528	0.992896	265.464	-1.22941e+06	41.0652	-568.081	4807.59	135.688	98.0704	0	2.37766	3.85629	3.931	0.49374
1700	1030	0.989322	0.993431	261.697	-1.22111e+06	40.7055	-564.602	4759.32	134.095	96.9552	0	2.37202	3.87164	4.045	0.496113
1700	1020	0.989975	0.993863	258.162	-1.21364e+06	40.3724	-561.229	4713.84	132.628	95.9293	0	2.36682	3.88148	4.159	0.498347
1700	1010	0.990586	0.994264	254.818	-1.20683e+06	40.061	-557.95	4670.79	131.263	94.9768	0	2.36204	3.89128	4.273	0.50045
1700	1000	0.991159	0.994638	251.649	-1.20062e+06	39.7694	-554.758	4629.94	129.994	94.0914	0	2.35765	3.901	4.386	0.502432
1700	990	0.991696	0.994985	248.639	-1.19496e+06	39.4961	-551.645	4591.09	128.812	93.2679	0	2.35364	3.91059	4.499	0.504301
1700	980	0.992201	0.99531	245.776	-1.1898e+06	39.2396	-548.607	4554.09	127.709	92.5016	0	2.34999	3.92	4.612	0.506065
1700	970	0.987531	0.991206	242.943	-1.18523e+06	38.9911	-544.679	4512.41	126.57	91.7883	0	2.34536	3.33792	4.721	0.511724
1700	960	0.964264	0.971112	238.714	-1.1754e+06	38.5517	-536.147	4439.61	124.446	90.6543	0	2.33492	2.90894	4.808	0.536619
1700	950	0.965993	0.972516	229.866	-1.13717e+06	37.3468	-526.867	4351.53	119.887	87.4244	0	2.32518	2.89646	4.892	0.561382
1700	940	0.967548	0.973772	221.712	-1.10198e+06	36.2336	-518.042	4269.88	115.702	84.4603	0	2.31609	2.88412	4.972	0.586029
1700	930	0.968954	0.974901	214.163	-1.06944e+06	35.2006	-509.618	4193.81	111.842	81.7277	0	2.30761	2.87194	5.049	0.610571
1700	920	0.970228	0.97592	207.146	-1.03921e+06	34.2379	-501.548	4122.61	108.268	79.1981	0	2.29968	2.85992	5.124	0.635023
1700	910	0.972744	0.978606	200.578	-1.01107e+06	33.3295	-494.469	4056.33	104.909	76.848	0	2.29189	2.9375	5.21	0.657453
1700	900	0.974476	0.979532	194.745	-986310	32.5451	-487.649	3994.54	101.979	74.7616	0	2.28531	2.86469	5.285	0.679755
1700	890	0.975145	0.98002	189.341	-963631	31.8097	-480.957	3936.91	99.2816	72.861	0	2.27914	2.84941	5.358	0.702229
1700	880	0.975737	0.980446	184.196	-942014	31.1067	-474.404	3881.67	96.7216	71.0574	0	2.27334	2.8345	5.428	0.724902
1700	870	0.976254	0.980813	179.284	-921345	30.4326	-467.974	3828.56	94.2844	69.3403	0	2.2679	2.81988	5.497	0.747808
1700	860	0.976694	0.981117	174.583	-901520	29.7844	-461.651	3777.3	91.9567	67.7004	0	2.26277	2.80545	5.563	0.770985
1700	850	0.976057	0.980451	170.058	-882450	29.1574	-455.258	3726.78	89.7184	66.1289	0	2.25783	2.77771	5.625	0.795114
1700	840	0.959251	0.965125	165.395	-863341	28.5004	-446.184	3662.1	87.3578	64.5522	0	2.25117	2.64646	5.642	0.830431
1700	830	0.960756	0.966491	158.571	-830078	27.4244	-436.784	3588.32	83.8053	61.928	0	2.24474	2.64459	5.658	0.86494
1700	820	0.962159	0.96776	152.255	-799312	26.4277	-427.903	3519	80.5197	59.5038	0	2.23854	2.64275	5.673	0.898616
1700	810	0.963469	0.968942	146.393	-770775	25.502	-419.487	3453.67	77.4722	57.2579	0	2.23255	2.64094	5.687	0.931438
1700	800	0.964695	0.970046	140.937	-744236	24.6397	-411.491	3391.89	74.638	55.1718	0	2.22679	2.63916	5.699	0.963396
1700	790	0.962832	0.96871	135.812	-719483	23.8276	-403.412	3332.18	71.9644	53.2265	0	2.22026	2.65347	5.706	0.99745
1700	780	0.939374	0.934795	130.488	-694425	23.2055	-557.164	3736.71	69.3054	51.2509	0	2.21939	2.05347	5.814	1.00018
1700	770	0.942588	0.937735	121.865	-653685	21.8086	-519.571	3484.34	64.947	48.1467	0	2.21911	2.03563	5.931	1.00016
1700	760	0.947571	0.943258	114.145	-617437	20.5466	-473.847	3216.27	61.0542	45.3855	0	2.21901	2.04098	6.047	1.00014
1700	750	0.951829	0.947965	107.461	-586275	19.4607	-435.892	2987.07	57.6979	43.0091	0	2.21906	2.04595	6.162	1.00013
1700	740	0.955508	0.95202	101.608	-559177	18.5154	-403.891	2788.41	54.7712	40.9405	0	2.21926	2.05043	6.275	1.00012
1700	730	0.958718	0.955544	96.4313	-535382	17.6842	-376.55	2614.21	52.1945	39.1222	0	2.21962	2.05434	6.387	1.0001
1700	720	0.961541	0.958629	91.8118	-514308	16.947	-352.918	2459.9	49.9072	37.5105	0	2.22012	2.05761	6.499	1.00009
1700	710	0.890185	0.884201	87.2579	-495890	16.3499	-429.576	2688.28	47.8474	36.0709	0	2.22111	2.09217	6.575	1.00008
1700	700	0.298564	0.288998	74.2879	-444891	14.9251	-1028.58	4926.9	42.4227	32.1129	0	2.22282	2.12266	5.889	1.0001
Liquid Compositions
Temperature (oC)	SiO2	TiO2	Al2O3	Fe2O3	FeO	MnO	MgO	CaO	Na2O	K2O	P2O5	H2O
1100	59.7739	1.61279	14.4344	1.26757	7.17663	0.131039	1.84462	4.17308	3.35661	3.28605	0.423356	2.51998
1090	59.7733	1.61277	14.4343	1.27633	7.16867	0.131038	1.84461	4.17305	3.35658	3.28602	0.423352	2.51995
1080	59.7728	1.61276	14.4342	1.28548	7.16036	0.131036	1.84459	4.17301	3.35655	3.28599	0.423349	2.51993
1070	59.7722	1.61274	14.434	1.29502	7.1517	0.131035	1.84457	4.17297	3.35652	3.28596	0.423344	2.51991
1060	60.118	1.49307	14.4979	1.25778	6.83469	0.131793	1.82847	4.19711	3.37593	3.30497	0.425793	2.53448
1050	60.4724	1.37346	14.5631	1.2179	6.50837	0.13257	1.81238	4.22185	3.39584	3.32445	0.428304	2.54943
1040	60.832	1.2805	14.7011	1.17153	6.14082	0.134096	1.66789	4.2625	3.43481	3.36272	0.433234	2.57877
1030	61.1738	1.19426	14.8305	1.12578	5.78888	0.13553	1.53666	4.30039	3.47142	3.39867	0.437865	2.60634
1020	61.4989	1.11454	14.9527	1.08059	5.45126	0.136889	1.41554	4.33594	3.50612	3.43275	0.442256	2.63247
1010	61.8082	1.04086	15.0683	1.03604	5.12769	0.138176	1.30378	4.3693	3.539	3.46504	0.446416	2.65724
1000	62.1022	0.972781	15.1775	0.992199	4.8179	0.139396	1.20068	4.40057	3.57014	3.49562	0.450356	2.68069
990	62.3815	0.909897	15.2806	0.949128	4.52164	0.140551	1.1056	4.42988	3.59961	3.52457	0.454086	2.70289
980	62.6468	0.851834	15.3779	0.906893	4.23863	0.141643	1.01793	4.45733	3.6275	3.55197	0.457615	2.7239
970	62.9597	0.797044	15.4153	0.864806	3.9646	0.143419	0.934934	4.45408	3.65041	3.5943	0.463352	2.75805
960	63.5416	0.74183	15.1895	0.820376	3.68669	0.148716	0.849824	4.31702	3.65064	3.71342	0.480468	2.85993
950	64.0952	0.691545	14.9644	0.777587	3.42597	0.153935	0.773142	4.18616	3.64489	3.82955	0.497328	2.96028
940	64.6223	0.645709	14.7402	0.736409	3.18132	0.159081	0.703954	4.06139	3.63352	3.94284	0.513954	3.05925
930	65.1246	0.603899	14.5172	0.696811	2.95175	0.164161	0.641446	3.9426	3.61682	4.0534	0.530367	3.15695
920	65.6035	0.56574	14.2954	0.658765	2.73636	0.169182	0.584905	3.82966	3.5951	4.16132	0.546588	3.2535
910	66.0715	0.525472	14.1753	0.620165	2.53441	0.173905	0.513952	3.62577	3.58921	4.2642	0.561847	3.34433
900	66.5047	0.485495	13.9973	0.586655	2.35586	0.178441	0.482717	3.47799	3.56349	4.35938	0.576501	3.43155
890	66.918	0.449129	13.819	0.554623	2.18801	0.18297	0.454124	3.33933	3.53244	4.45264	0.591133	3.51865
880	67.3126	0.416048	13.6406	0.524001	2.03025	0.1875	0.427875	3.20941	3.49625	4.54395	0.605769	3.60577
870	67.6897	0.385959	13.4621	0.494734	1.88202	0.192041	0.403702	3.08789	3.45508	4.63326	0.620441	3.6931
860	68.0501	0.358606	13.2837	0.466772	1.74283	0.196605	0.381364	2.97449	3.40905	4.72044	0.635184	3.78086
850	68.3961	0.334104	13.1021	0.440414	1.61385	0.201408	0.360573	2.87316	3.35984	4.79443	0.650703	3.87323
840	68.7533	0.317722	12.8642	0.421016	1.51945	0.209942	0.339631	2.85142	3.33512	4.67257	0.678276	4.03736
830	69.1062	0.301995	12.624	0.402348	1.42936	0.218496	0.31976	2.83035	3.30862	4.55111	0.705909	4.20184
820	69.4551	0.286915	12.3815	0.384385	1.34342	0.227066	0.300908	2.80996	3.28033	4.43015	0.733597	4.36665
810	69.7999	0.272474	12.137	0.367099	1.26147	0.235652	0.283025	2.79025	3.25024	4.3098	0.761336	4.53176
800	70.1408	0.258661	11.8904	0.350467	1.18337	0.244251	0.266066	2.77123	3.21835	4.19016	0.789118	4.69713
790	70.4877	0.244411	11.6331	0.328576	1.08758	0.253509	0.219884	2.78044	3.1816	4.08552	0.819541	4.87822
780	71.2409	0.223789	11.1572	0.315701	1.02508	0.2696	0.191012	2.78688	3.09346	3.94173	0.872387	4.8823
770	72.0026	0.205551	10.6841	0.301705	0.960084	0.285761	0.164865	2.79635	2.99901	3.80622	0.925467	4.86826
760	72.7333	0.189154	10.2317	0.287054	0.894369	0.301323	0.142017	2.80883	2.90353	3.68008	0.976608	4.85204
750	73.4357	0.174358	9.79792	0.271952	0.828814	0.316333	0.122152	2.8238	2.80774	3.56165	1.02596	4.83366
740	74.112	0.160961	9.381	0.256596	0.764211	0.330831	0.104966	2.84083	2.71219	3.44961	1.07365	4.81311
730	74.7643	0.148789	8.97953	0.241174	0.701257	0.344852	0.090164	2.8596	2.61725	3.34294	1.11979	4.79033
720	75.3943	0.137694	8.59221	0.225855	0.640535	0.358426	0.0774694	2.87982	2.52319	3.24079	1.16447	4.76523
710	75.9247	0.127189	8.16206	0.213203	0.587485	0.40226	0.0653064	2.95942	2.44511	3.13431	1.22917	4.74977
700	75.1866	0.108385	6.96544	0.237378	0.612595	1.33609	0.0241172	3.34952	2.95146	2.74104	1.37434	5.11298
Solids compositions
Temperature	1100	P	1700
Temperature	1090	P	1700
Temperature	1080	P	1700
Temperature	1070	P	1700
Temperature	1060	P	1700
spinel_0	0.58086	Fe''1.35Mg0.24Fe'''0.68Al0.14Cr0.00Ti0.59O4	0	21.9057	3.32568	25.2346	0	44.9872	0	4.54694	0	0	0	0	0	0	0	0	0	0	0
Temperature	1050	P	1700
spinel_0	0.589873	Fe''1.34Mg0.24Fe'''0.70Al0.14Cr0.00Ti0.58O4	0	21.3844	3.38653	26.13	0	44.6245	0	4.47456	0	0	0	0	0	0	0	0	0	0	0
Temperature	1040	P	1700
orthopyroxene_0	0.621931	opx	Na0.00Ca0.05Fe''0.66Mg1.24Fe'''0.02Ti0.00Al0.08Si1.95O6	52.4484	0.0863769	1.85689	0.733092	0	21.2521	0	22.3673	0	0	1.23792	0.0180031	0	0	0	0	0	0	0
spinel_0	0.503096	Fe''1.34Mg0.23Fe'''0.73Al0.14Cr0.00Ti0.56O4	0	20.8958	3.40774	26.9113	0	44.5641	0	4.22108	0	0	0	0	0	0	0	0	0	0	0
Temperature	1030	P	1700
orthopyroxene_0	0.566837	opx	Na0.00Ca0.05Fe''0.68Mg1.22Fe'''0.02Ti0.00Al0.08Si1.95O6	52.3082	0.0812475	1.8898	0.732165	0	21.6907	0	21.9763	0	0	1.30306	0.0185771	0	0	0	0	0	0	0
spinel_0	0.468415	Fe''1.34Mg0.21Fe'''0.75Al0.15Cr0.00Ti0.55O4	0	20.4102	3.4291	27.6966	0	44.4781	0	3.986	0	0	0	0	0	0	0	0	0	0	0
Temperature	1020	P	1700
orthopyroxene_0	0.525709	opx	Na0.00Ca0.05Fe''0.69Mg1.20Fe'''0.02Ti0.00Al0.08Si1.95O6	52.1689	0.0765196	1.92397	0.731106	0	22.1213	0	21.59	0	0	1.36903	0.0191709	0	0	0	0	0	0	0
spinel_0	0.435952	Fe''1.34Mg0.20Fe'''0.77Al0.15Cr0.00Ti0.54O4	0	19.9297	3.44968	28.4806	0	44.3748	0	3.76525	0	0	0	0	0	0	0	0	0	0	0
Temperature	1010	P	1700
orthopyroxene_0	0.487893	opx	Na0.00Ca0.06Fe''0.70Mg1.18Fe'''0.02Ti0.00Al0.09Si1.95O6	52.0308	0.0721646	1.95933	0.729876	0	22.5434	0	21.2088	0	0	1.43585	0.0197863	0	0	0	0	0	0	0
spinel_0	0.406206	Fe''1.34Mg0.19Fe'''0.80Al0.15Cr0.00Ti0.53O4	0	19.456	3.46924	29.2601	0	44.2566	0	3.55804	0	0	0	0	0	0	0	0	0	0	0
Temperature	1000	P	1700
orthopyroxene_0	0.453065	opx	Na0.00Ca0.06Fe''0.72Mg1.16Fe'''0.02Ti0.00Al0.09Si1.94O6	51.8942	0.0681552	1.99575	0.728433	0	22.9564	0	20.8331	0	0	1.50357	0.0204252	0	0	0	0	0	0	0
spinel_0	0.378839	Fe''1.34Mg0.18Fe'''0.82Al0.15Cr0.00Ti0.52O4	0	18.9906	3.48755	30.0318	0	44.1264	0	3.36363	0	0	0	0	0	0	0	0	0	0	0
Temperature	990	P	1700
orthopyroxene_0	0.420943	opx	Na0.00Ca0.06Fe''0.73Mg1.15Fe'''0.02Ti0.00Al0.09Si1.94O6	51.7592	0.0644654	2.03312	0.726729	0	23.3599	0	20.4632	0	0	1.5723	0.0210901	0	0	0	0	0	0	0
spinel_0	0.353566	Fe''1.33Mg0.17Fe'''0.84Al0.15Cr0.00Ti0.51O4	0	18.5352	3.50435	30.7926	0	43.9866	0	3.18129	0	0	0	0	0	0	0	0	0	0	0
Temperature	980	P	1700
orthopyroxene_0	0.391285	opx	Na0.00Ca0.07Fe''0.75Mg1.13Fe'''0.02Ti0.00Al0.09Si1.94O6	51.6261	0.0610705	2.0713	0.724716	0	23.7534	0	20.0994	0	0	1.6422	0.0217838	0	0	0	0	0	0	0
spinel_0	0.330146	Fe''1.33Mg0.16Fe'''0.86Al0.15Cr0.00Ti0.49O4	0	18.0915	3.51938	31.539	0	43.8398	0	3.01032	0	0	0	0	0	0	0	0	0	0	0
Temperature	970	P	1700
orthopyroxene_0	0.39244	opx	Na0.00Ca0.07Fe''0.76Mg1.11Fe'''0.02Ti0.00Al0.09Si1.94O6	51.502	0.0576186	2.09473	0.720445	0	24.1618	0	19.7454	0	0	1.69562	0.0223466	0	0	0	0	0	0	0
feldspar_0	0.416935	K0.03Na0.43Ca0.54Al1.54Si2.46O8	54.3555	0	29.0238	0	0	0	0	0	0	0	11.2618	4.88277	0.47618	0	0	0	0	0	0
spinel_0	0.335166	Fe''1.33Mg0.15Fe'''0.88Al0.15Cr0.00Ti0.48O4	0	17.6921	3.50354	32.2402	0	43.7174	0	2.8467	0	0	0	0	0	0	0	0	0	0	0
Temperature	960	P	1700
orthopyroxene_0	0.481384	opx	Na0.00Ca0.07Fe''0.78Mg1.09Fe'''0.02Ti0.00Al0.09Si1.94O6	51.4125	0.053006	2.04571	0.706888	0	24.681	0	19.4161	0	0	1.66261	0.022119	0	0	0	0	0	0	0
feldspar_0	2.33473	K0.03Na0.44Ca0.53Al1.53Si2.47O8	54.7363	0	28.7592	0	0	0	0	0	0	0	10.9547	5.03797	0.511776	0	0	0	0	0	0
spinel_0	0.423518	Fe''1.33Mg0.15Fe'''0.90Al0.14Cr0.00Ti0.48O4	0	17.455	3.35257	32.7851	0	43.7276	0	2.67967	0	0	0	0	0	0	0	0	0	0	0
Temperature	950	P	1700
orthopyroxene_0	0.422818	opx	Na0.00Ca0.07Fe''0.80Mg1.08Fe'''0.02Ti0.00Al0.09Si1.94O6	51.3227	0.0488496	1.99899	0.693526	0	25.1963	0	19.0913	0	0	1.62648	0.0218636	0	0	0	0	0	0	0
feldspar_0	2.17625	K0.03Na0.45Ca0.51Al1.51Si2.49O8	55.1181	0	28.4934	0	0	0	0	0	0	0	10.6463	5.19201	0.550093	0	0	0	0	0	0
spinel_0	0.37398	Fe''1.34Mg0.14Fe'''0.92Al0.14Cr0.00Ti0.47O4	0	17.225	3.20875	33.3146	0	43.7271	0	2.52461	0	0	0	0	0	0	0	0	0	0	0
Temperature	940	P	1700
orthopyroxene_0	0.372853	opx	Na0.00Ca0.06Fe''0.82Mg1.06Fe'''0.02Ti0.00Al0.09Si1.95O6	51.2328	0.0450943	1.95418	0.680286	0	25.7074	0	18.771	0	0	1.58777	0.0215812	0	0	0	0	0	0	0
feldspar_0	2.03659	K0.03Na0.47Ca0.50Al1.50Si2.50O8	55.5002	0	28.2268	0	0	0	0	0	0	0	10.3372	5.34437	0.591441	0	0	0	0	0	0
spinel_0	0.33143	Fe''1.34Mg0.13Fe'''0.93Al0.13Cr0.00Ti0.47O4	0	17.0033	3.07115	33.8264	0	43.7186	0	2.38048	0	0	0	0	0	0	0	0	0	0	0
Temperature	930	P	1700
orthopyroxene_0	0.329973	opx	Na0.00Ca0.06Fe''0.83Mg1.05Fe'''0.02Ti0.00Al0.09Si1.95O6	51.1431	0.0416935	1.91091	0.667101	0	26.2138	0	18.4551	0	0	1.547	0.0212731	0	0	0	0	0	0	0
feldspar_0	1.91273	K0.04Na0.48Ca0.48Al1.48Si2.52O8	55.8819	0	27.9596	0	0	0	0	0	0	0	10.0277	5.49458	0.63619	0	0	0	0	0	0
spinel_0	0.294633	Fe''1.34Mg0.12Fe'''0.95Al0.13Cr0.00Ti0.46O4	0	16.7913	2.93902	34.3185	0	43.7048	0	2.24637	0	0	0	0	0	0	0	0	0	0	0
Temperature	920	P	1700
orthopyroxene_0	0.292976	opx	Na0.00Ca0.06Fe''0.85Mg1.03Fe'''0.02Ti0.00Al0.08Si1.95O6	51.054	0.0386078	1.86885	0.653909	0	26.7152	0	18.1438	0	0	1.50466	0.0209405	0	0	0	0	0	0	0
feldspar_0	1.80227	K0.04Na0.49Ca0.47Al1.47Si2.53O8	56.263	0	27.692	0	0	0	0	0	0	0	9.718	5.6422	0.684788	0	0	0	0	0	0
spinel_0	0.262617	Fe''1.34Mg0.12Fe'''0.96Al0.12Cr0.00Ti0.46O4	0	16.5903	2.81173	34.7888	0	43.6877	0	2.12146	0	0	0	0	0	0	0	0	0	0	0
Temperature	910	P	1700
clinopyroxene_0	0.549762	cpx	Na0.03Ca0.82Fe''0.39Mg0.63Fe'''0.05Ti0.03Al0.18Si1.87O6	49.1473	0.970976	4.02278	1.90585	0	12.4149	0	11.1012	0	0	20.0632	0.373866	0	0	0	0	0	0	0
feldspar_0	1.31981	K0.04Na0.51Ca0.45Al1.45Si2.55O8	56.834	0	27.2921	0	0	0	0	0	0	0	9.25482	5.86621	0.752881	0	0	0	0	0	0
spinel_0	0.224973	Fe''1.34Mg0.11Fe'''0.98Al0.12Cr0.00Ti0.45O4	0	16.3292	2.71791	35.318	0	43.671	0	1.96393	0	0	0	0	0	0	0	0	0	0	0
Temperature	900	P	1700
clinopyroxene_0	0.25455	cpx	Na0.03Ca0.81Fe''0.40Mg0.63Fe'''0.05Ti0.03Al0.17Si1.88O6	49.308	0.90334	3.86968	1.83625	0	12.6341	0	11.1223	0	0	19.9474	0.378799	0	0	0	0	0	0	0
feldspar_0	1.42262	K0.05Na0.53Ca0.43Al1.43Si2.57O8	57.3153	0	26.9523	0	0	0	0	0	0	0	8.86221	6.04816	0.821953	0	0	0	0	0	0
spinel_0	0.231081	Fe''1.34Mg0.10Fe'''1.00Al0.11Cr0.00Ti0.44O4	0	16.0042	2.63335	35.9983	0	43.4859	0	1.8782	0	0	0	0	0	0	0	0	0	0	0
Temperature	890	P	1700
clinopyroxene_0	0.227766	cpx	Na0.03Ca0.81Fe''0.41Mg0.63Fe'''0.05Ti0.02Al0.17Si1.88O6	49.4622	0.840757	3.7209	1.76722	0	12.8503	0	11.1456	0	0	19.8296	0.383419	0	0	0	0	0	0	0
feldspar_0	1.37383	K0.05Na0.54Ca0.41Al1.41Si2.59O8	57.7949	0	26.6118	0	0	0	0	0	0	0	8.46937	6.22422	0.899642	0	0	0	0	0	0
spinel_0	0.20939	Fe''1.34Mg0.10Fe'''1.02Al0.11Cr0.00Ti0.44O4	0	15.6869	2.54948	36.6659	0	43.3002	0	1.79756	0	0	0	0	0	0	0	0	0	0	0
Temperature	880	P	1700
clinopyroxene_0	0.204594	cpx	Na0.03Ca0.80Fe''0.42Mg0.63Fe'''0.05Ti0.02Al0.16Si1.89O6	49.6101	0.782911	3.57627	1.69887	0	13.0634	0	11.1709	0	0	19.7098	0.387703	0	0	0	0	0	0	0
feldspar_0	1.32954	K0.06Na0.56Ca0.39Al1.39Si2.61O8	58.2737	0	26.2695	0	0	0	0	0	0	0	8.07527	6.3936	0.987955	0	0	0	0	0	0
spinel_0	0.189936	Fe''1.33Mg0.09Fe'''1.04Al0.11Cr0.00Ti0.43O4	0	15.379	2.46615	37.317	0	43.1161	0	1.72165	0	0	0	0	0	0	0	0	0	0	0
Temperature	870	P	1700
clinopyroxene_0	0.184522	cpx	Na0.03Ca0.80Fe''0.42Mg0.64Fe'''0.05Ti0.02Al0.15Si1.89O6	49.7516	0.729543	3.43573	1.63137	0	13.2736	0	11.198	0	0	19.5886	0.39163	0	0	0	0	0	0	0
feldspar_0	1.28961	K0.06Na0.57Ca0.37Al1.37Si2.63O8	58.7531	0	25.9237	0	0	0	0	0	0	0	7.67809	6.55536	1.08976	0	0	0	0	0	0
spinel_0	0.172413	Fe''1.33Mg0.09Fe'''1.06Al0.10Cr0.00Ti0.42O4	0	15.0827	2.38321	37.9479	0	42.9361	0	1.65012	0	0	0	0	0	0	0	0	0	0	0
Temperature	860	P	1700
clinopyroxene_0	0.16714	cpx	Na0.03Ca0.79Fe''0.43Mg0.64Fe'''0.04Ti0.02Al0.15Si1.90O6	49.8868	0.680458	3.29928	1.56489	0	13.4805	0	11.2264	0	0	19.4664	0.39518	0	0	0	0	0	0	0
feldspar_0	1.25411	K0.07Na0.58Ca0.35Al1.35Si2.65O8	59.236	0	25.5715	0	0	0	0	0	0	0	7.27482	6.70824	1.20942	0	0	0	0	0	0
spinel_0	0.156568	Fe''1.32Mg0.09Fe'''1.07Al0.10Cr0.00Ti0.41O4	0	14.7999	2.30051	38.5545	0	42.7624	0	1.58263	0	0	0	0	0	0	0	0	0	0	0
Temperature	850	P	1700
clinopyroxene_0	0.154751	cpx	Na0.03Ca0.79Fe''0.44Mg0.64Fe'''0.04Ti0.02Al0.14Si1.90O6	50.0096	0.638491	3.17131	1.50127	0	13.6763	0	11.2488	0	0	19.3558	0.398451	0	0	0	0	0	0	0
feldspar_0	1.19332	K0.08Na0.59Ca0.33Al1.33Si2.67O8	59.7085	0	25.2229	0	0	0	0	0	0	0	6.87699	6.84733	1.34424	0	0	0	0	0	0
feldspar_1	0.093407	K0.66Na0.31Ca0.03Al1.03Si2.97O8	65.2953	0	19.1972	0	0	0	0	0	0	0	0.602141	3.50009	11.4052	0	0	0	0	0	0
spinel_0	0.141827	Fe''1.32Mg0.08Fe'''1.09Al0.10Cr0.00Ti0.41O4	0	14.5508	2.21689	39.0992	0	42.6143	0	1.51884	0	0	0	0	0	0	0	0	0	0	0
Temperature	840	P	1700
clinopyroxene_0	0.186395	cpx	Na0.03Ca0.79Fe''0.44Mg0.63Fe'''0.04Ti0.02Al0.14Si1.90O6	50.0175	0.654032	3.12561	1.46815	0	13.7289	0	11.1484	0	0	19.4537	0.403728	0	0	0	0	0	0	0
feldspar_0	0.6382	K0.08Na0.60Ca0.32Al1.32Si2.68O8	59.8407	0	25.1401	0	0	0	0	0	0	0	6.77785	6.9249	1.31639	0	0	0	0	0	0
feldspar_1	1.68404	K0.67Na0.31Ca0.03Al1.03Si2.97O8	65.3231	0	19.1663	0	0	0	0	0	0	0	0.570161	3.481	11.4594	0	0	0	0	0	0
spinel_0	0.121837	Fe''1.33Mg0.08Fe'''1.09Al0.09Cr0.00Ti0.41O4	0	14.645	2.11566	39.0034	0	42.7782	0	1.45771	0	0	0	0	0	0	0	0	0	0	0
Temperature	830	P	1700
clinopyroxene_0	0.168871	cpx	Na0.03Ca0.80Fe''0.44Mg0.63Fe'''0.04Ti0.02Al0.14Si1.91O6	50.0242	0.669897	3.08023	1.43566	0	13.7869	0	11.0472	0	0	19.5467	0.409171	0	0	0	0	0	0	0
feldspar_0	0.607885	K0.07Na0.61Ca0.32Al1.32Si2.68O8	59.9758	0	25.0553	0	0	0	0	0	0	0	6.67634	7.00356	1.28898	0	0	0	0	0	0
feldspar_1	1.5444	K0.67Na0.31Ca0.03Al1.03Si2.97O8	65.3496	0	19.1362	0	0	0	0	0	0	0	0.539161	3.46109	11.5139	0	0	0	0	0	0
spinel_0	0.109138	Fe''1.33Mg0.08Fe'''1.09Al0.09Cr0.00Ti0.41O4	0	14.7341	2.0181	38.9139	0	42.9358	0	1.39804	0	0	0	0	0	0	0	0	0	0	0
Temperature	820	P	1700
clinopyroxene_0	0.153366	cpx	Na0.03Ca0.80Fe''0.44Mg0.62Fe'''0.04Ti0.02Al0.14Si1.91O6	50.0293	0.686167	3.03523	1.40383	0	13.8503	0	10.9451	0	0	19.6352	0.414799	0	0	0	0	0	0	0
feldspar_0	0.580578	K0.07Na0.61Ca0.31Al1.31Si2.69O8	60.1139	0	24.9684	0	0	0	0	0	0	0	6.57244	7.08331	1.262	0	0	0	0	0	0
feldspar_1	1.4198	K0.67Na0.30Ca0.02Al1.02Si2.98O8	65.3747	0	19.107	0	0	0	0	0	0	0	0.509134	3.44032	11.5689	0	0	0	0	0	0
spinel_0	0.097963	Fe''1.34Mg0.07Fe'''1.09Al0.08Cr0.00Ti0.41O4	0	14.8187	1.92403	38.8298	0	43.0876	0	1.33981	0	0	0	0	0	0	0	0	0	0	0
Temperature	810	P	1700
clinopyroxene_0	0.139596	cpx	Na0.03Ca0.81Fe''0.44Mg0.62Fe'''0.04Ti0.02Al0.13Si1.91O6	50.0329	0.702936	2.99065	1.37269	0	13.9191	0	10.8417	0	0	19.7194	0.420627	0	0	0	0	0	0	0
feldspar_0	0.555877	K0.07Na0.62Ca0.31Al1.31Si2.69O8	60.2548	0	24.8794	0	0	0	0	0	0	0	6.46616	7.16416	1.23546	0	0	0	0	0	0
feldspar_1	1.30814	K0.67Na0.30Ca0.02Al1.02Si2.98O8	65.3985	0	19.0785	0	0	0	0	0	0	0	0.480076	3.41867	11.6243	0	0	0	0	0	0
spinel_0	0.088093	Fe''1.35Mg0.07Fe'''1.09Al0.08Cr0.00Ti0.42O4	0	14.8993	1.83328	38.7503	0	43.234	0	1.28305	0	0	0	0	0	0	0	0	0	0	0
Temperature	800	P	1700
clinopyroxene_0	0.127324	cpx	Na0.03Ca0.81Fe''0.45Mg0.61Fe'''0.04Ti0.02Al0.13Si1.91O6	50.0347	0.720309	2.94659	1.34226	0	13.9931	0	10.7368	0	0	19.7995	0.426675	0	0	0	0	0	0	0
feldspar_0	0.53345	K0.07Na0.63Ca0.30Al1.30Si2.70O8	60.3986	0	24.7884	0	0	0	0	0	0	0	6.35753	7.24609	1.20934	0	0	0	0	0	0
feldspar_1	1.20771	K0.68Na0.30Ca0.02Al1.02Si2.98O8	65.421	0	19.0508	0	0	0	0	0	0	0	0.451982	3.3961	11.6802	0	0	0	0	0	0
spinel_0	0.079344	Fe''1.35Mg0.07Fe'''1.08Al0.08Cr0.00Ti0.42O4	0	14.9764	1.74568	38.6746	0	43.3755	0	1.22777	0	0	0	0	0	0	0	0	0	0	0
Temperature	790	P	1700
clinopyroxene_0	0.229792	cpx	Na0.00Ca0.11Fe''1.09Mg0.74Fe'''0.02Ti0.00Al0.08Si1.95O6	49.3641	0.0370339	1.62065	0.657824	0	33.0859	0	12.4948	0	0	2.68242	0.0572277	0	0	0	0	0	0	0
feldspar_0	0.625184	K0.07Na0.63Ca0.30Al1.30Si2.70O8	60.4628	0	24.7537	0	0	0	0	0	0	0	6.31385	7.2981	1.17153	0	0	0	0	0	0
feldspar_1	1.09789	K0.68Na0.30Ca0.02Al1.02Si2.98O8	65.4345	0	19.0215	0	0	0	0	0	0	0	0.424722	3.34958	11.7697	0	0	0	0	0	0
rhm	oxide_0	0.025439	Mn0.01Fe''0.87Mg0.05Fe'''0.15Ti0.93O3	0	49.0777	0	7.81578	0	41.4832	0.318698	1.30457	0	0	0	0	0	0	0	0	0	0	0
Temperature	780	P	1700
clinopyroxene_0	0.175807	cpx	Na0.00Ca0.11Fe''1.15Mg0.69Fe'''0.02Ti0.00Al0.07Si1.95O6	49.0681	0.0318716	1.55035	0.659535	0	34.461	0	11.6242	0	0	2.55051	0.0544559	0	0	0	0	0	0	0
feldspar_0	1.19648	K0.07Na0.64Ca0.29Al1.29Si2.71O8	60.7695	0	24.5476	0	0	0	0	0	0	0	6.07232	7.44125	1.16932	0	0	0	0	0	0
feldspar_1	1.54879	K0.68Na0.30Ca0.02Al1.02Si2.98O8	65.4689	0	18.9997	0	0	0	0	0	0	0	0.398676	3.36903	11.7637	0	0	0	0	0	0
rhm	oxide_0	0.036592	Mn0.01Fe''0.88Mg0.04Fe'''0.15Ti0.93O3	0	49.0572	0	7.74975	0	41.6778	0.345348	1.16992	0	0	0	0	0	0	0	0	0	0	0
water	0.149476	H2O
Temperature	770	P	1700
clinopyroxene_0	0.157606	cpx	Na0.00Ca0.10Fe''1.20Mg0.64Fe'''0.02Ti0.00Al0.07Si1.96O6	48.7764	0.0274436	1.47721	0.659462	0	35.8163	0	10.7547	0	0	2.43664	0.0518223	0	0	0	0	0	0	0
feldspar_0	1.09423	K0.07Na0.65Ca0.28Al1.28Si2.72O8	61.065	0	24.3494	0	0	0	0	0	0	0	5.83982	7.58017	1.16559	0	0	0	0	0	0
feldspar_1	1.34071	K0.68Na0.30Ca0.02Al1.02Si2.98O8	65.5012	0	18.9779	0	0	0	0	0	0	0	0.37317	3.38394	11.7638	0	0	0	0	0	0
rhm	oxide_0	0.030385	Mn0.01Fe''0.88Mg0.04Fe'''0.15Ti0.93O3	0	49.0508	0	7.66705	0	41.8591	0.374555	1.04841	0	0	0	0	0	0	0	0	0	0	0
water	0.141288	H2O
Temperature	760	P	1700
clinopyroxene_0	0.137242	cpx	Na0.00Ca0.10Fe''1.25Mg0.60Fe'''0.02Ti0.00Al0.07Si1.96O6	48.5044	0.023729	1.40331	0.656075	0	37.0891	0	9.92698	0	0	2.34702	0.0494215	0	0	0	0	0	0	0
feldspar_0	0.958782	K0.07Na0.67Ca0.27Al1.27Si2.73O8	61.3304	0	24.1725	0	0	0	0	0	0	0	5.63199	7.70777	1.15736	0	0	0	0	0	0
feldspar_1	1.13544	K0.68Na0.30Ca0.02Al1.02Si2.98O8	65.5293	0	18.9558	0	0	0	0	0	0	0	0.348334	3.38855	11.778	0	0	0	0	0	0
rhm	oxide_0	0.025265	Mn0.01Fe''0.88Mg0.04Fe'''0.14Ti0.93O3	0	49.0596	0	7.56748	0	42.0263	0.404704	0.941945	0	0	0	0	0	0	0	0	0	0	0
water	0.122769	H2O
Temperature	750	P	1700
clinopyroxene_0	0.120221	cpx	Na0.00Ca0.10Fe''1.30Mg0.55Fe'''0.02Ti0.00Al0.06Si1.96O6	48.2543	0.0205845	1.32879	0.648885	0	38.2739	0	9.14832	0	0	2.27795	0.0472273	0	0	0	0	0	0	0
feldspar_0	0.847879	K0.07Na0.68Ca0.26Al1.26Si2.74O8	61.5706	0	24.0134	0	0	0	0	0	0	0	5.44466	7.82603	1.14527	0	0	0	0	0	0
feldspar_1	0.974451	K0.69Na0.30Ca0.02Al1.02Si2.98O8	65.5535	0	18.9335	0	0	0	0	0	0	0	0.3243	3.38403	11.8047	0	0	0	0	0	0
rhm	oxide_0	0.021262	Mn0.01Fe''0.89Mg0.03Fe'''0.14Ti0.93O3	0	49.0822	0	7.45167	0	42.1817	0.436018	0.848378	0	0	0	0	0	0	0	0	0	0	0
water	0.107996	H2O
Temperature	740	P	1700
clinopyroxene_0	0.105725	cpx	Na0.00Ca0.10Fe''1.34Mg0.51Fe'''0.02Ti0.00Al0.06Si1.96O6	48.0276	0.0179031	1.25402	0.637672	0	39.3674	0	8.42352	0	0	2.22666	0.0452224	0	0	0	0	0	0	0
feldspar_0	0.755728	K0.06Na0.68Ca0.25Al1.25Si2.75O8	61.79	0	23.8691	0	0	0	0	0	0	0	5.27444	7.93657	1.1299	0	0	0	0	0	0
feldspar_1	0.845968	K0.69Na0.30Ca0.01Al1.01Si2.99O8	65.574	0	18.9112	0	0	0	0	0	0	0	0.301165	3.37139	11.8422	0	0	0	0	0	0
rhm	oxide_0	0.018086	Mn0.01Fe''0.89Mg0.03Fe'''0.14Ti0.93O3	0	49.1174	0	7.3207	0	42.3272	0.468718	0.765926	0	0	0	0	0	0	0	0	0	0	0
water	0.096032	H2O
Temperature	730	P	1700
clinopyroxene_0	0.093201	cpx	Na0.00Ca0.10Fe''1.39Mg0.47Fe'''0.02Ti0.00Al0.06Si1.96O6	47.8245	0.0156028	1.17952	0.622475	0	40.3685	0	7.7549	0	0	2.19107	0.0433938	0	0	0	0	0	0	0
feldspar_0	0.678224	K0.06Na0.69Ca0.24Al1.24Si2.76O8	61.9919	0	23.7372	0	0	0	0	0	0	0	5.11846	8.04069	1.11176	0	0	0	0	0	0
feldspar_1	0.741868	K0.69Na0.30Ca0.01Al1.01Si2.99O8	65.5911	0	18.8892	0	0	0	0	0	0	0	0.278999	3.35156	11.8892	0	0	0	0	0	0
rhm	oxide_0	0.015533	Mn0.01Fe''0.90Mg0.03Fe'''0.14Ti0.93O3	0	49.1639	0	7.17594	0	42.464	0.503024	0.693102	0	0	0	0	0	0	0	0	0	0	0
water	0.086222	H2O
Temperature	720	P	1700
clinopyroxene_0	0.082269	cpx	Na0.00Ca0.10Fe''1.42Mg0.44Fe'''0.02Ti0.00Al0.05Si1.97O6	47.6447	0.0136203	1.10583	0.603552	0	41.2782	0	7.14273	0	0	2.16958	0.0417306	0	0	0	0	0	0	0
feldspar_0	0.612394	K0.06Na0.70Ca0.24Al1.24Si2.76O8	62.1795	0	23.6154	0	0	0	0	0	0	0	4.97425	8.1395	1.09133	0	0	0	0	0	0
feldspar_1	0.656393	K0.69Na0.29Ca0.01Al1.01Si2.99O8	65.6049	0	18.8675	0	0	0	0	0	0	0	0.257848	3.32538	11.9444	0	0	0	0	0	0
rhm	oxide_0	0.013457	Mn0.01Fe''0.90Mg0.02Fe'''0.13Ti0.93O3	0	49.2202	0	7.019	0	42.593	0.539163	0.628654	0	0	0	0	0	0	0	0	0	0	0
water	0.078098	H2O
Temperature	710	P	1700
clinopyroxene_0	0.107247	cpx	Na0.00Ca0.10Fe''1.46Mg0.40Fe'''0.02Ti0.00Al0.05Si1.97O6	47.4601	0.0119948	1.02726	0.587871	0	42.1456	0	6.47437	0	0	2.25182	0.0409814	0	0	0	0	0	0	0
feldspar_0	1.01839	K0.06Na0.71Ca0.23Al1.23Si2.77O8	62.3007	0	23.5406	0	0	0	0	0	0	0	4.88425	8.21361	1.06077	0	0	0	0	0	0
feldspar_1	1.26192	K0.70Na0.29Ca0.01Al1.01Si2.99O8	65.61	0	18.8451	0	0	0	0	0	0	0	0.23817	3.27809	12.0287	0	0	0	0	0	0
quartz	1.30234	SiO2
rhm	oxide_0	0.018883	Mn0.01Fe''0.90Mg0.02Fe'''0.13Ti0.93O3	0	49.2651	0	6.88197	0	42.6699	0.621818	0.561199	0	0	0	0	0	0	0	0	0	0	0
apatite	0.059729	Ca5(PO4)3OH
water	0.192607	H2O
Temperature	700	P	1700
clinopyroxene_0	0.561733	cpx	Na0.04Ca0.84Fe''0.81Mg0.20Fe'''0.07Ti0.02Al0.10Si1.91O6	47.5324	0.732198	2.18536	2.18676	0	23.9746	0	3.30569	0	0	19.517	0.565936	0	0	0	0	0	0	0
feldspar_0	3.58565	K0.06Na0.73Ca0.21Al1.21Si2.79O8	62.8079	0	23.1924	0	0	0	0	0	0	0	4.47856	8.43085	1.09028	0	0	0	0	0	0
feldspar_1	5.8922	K0.69Na0.29Ca0.01Al1.01Si2.99O8	65.6543	0	18.8309	0	0	0	0	0	0	0	0.216128	3.3396	11.9591	0	0	0	0	0	0
quartz	10.7857	SiO2
rhm	oxide_0	0.054658	Mn0.04Fe''0.88Mg0.01Fe'''0.13Ti0.93O3	0	49.0836	0	7.03183	0	41.6373	1.957	0.290246	0	0	0	0	0	0	0	0	0	0	0
apatite	0.621277	Ca5(PO4)3OH
water	1.0239	H2O
Phase Masses
Temperature (oC)	Pressure (bars)	liquid_0	olivine_0	orthopyroxene_0	clinopyroxene_0	clinopyroxene_1	clinoamphibole_0	feldspar_0	feldspar_1	quartz	spinel_0	rhm	apatite	water
1100	1700	99.2073	0	0	0	0	0	0	0	0	0	0	0	0
1090	1700	99.2081	0	0	0	0	0	0	0	0	0	0	0	0
1080	1700	99.209	0	0	0	0	0	0	0	0	0	0	0	0
1070	1700	99.21	0	0	0	0	0	0	0	0	0	0	0	0
1060	1700	98.6394	0	0	0	0	0	0	0	0	0.58086	0	0	0
1050	1700	98.0613	0	0	0	0	0	0	0	0	0.589873	0	0	0
1040	1700	96.9454	0	0.621931	0	0	0	0	0	0	0.503096	0	0	0
1030	1700	95.9199	0	0.566837	0	0	0	0	0	0	0.468415	0	0	0
1020	1700	94.9677	0	0.525709	0	0	0	0	0	0	0.435952	0	0	0
1010	1700	94.0827	0	0.487893	0	0	0	0	0	0	0.406206	0	0	0
1000	1700	93.2595	0	0.453065	0	0	0	0	0	0	0.378839	0	0	0
990	1700	92.4934	0	0.420943	0	0	0	0	0	0	0.353566	0	0	0
980	1700	91.7801	0	0.391285	0	0	0	0	0	0	0.330146	0	0	0
970	1700	90.6438	0	0.39244	0	0	0	0.416935	0	0	0.335166	0	0	0
960	1700	87.4147	0	0.481384	0	0	0	2.33473	0	0	0.423518	0	0	0
950	1700	84.4513	0	0.422818	0	0	0	2.17625	0	0	0.37398	0	0	0
940	1700	81.7194	0	0.372853	0	0	0	2.03659	0	0	0.33143	0	0	0
930	1700	79.1904	0	0.329973	0	0	0	1.91273	0	0	0.294633	0	0	0
920	1700	76.8403	0	0.292976	0	0	0	1.80227	0	0	0.262617	0	0	0
910	1700	74.7534	0	0	0.549762	0	0	1.31981	0	0	0.224973	0	0	0
900	1700	72.8533	0	0	0.25455	0	0	1.42262	0	0	0.231081	0	0	0
890	1700	71.0501	0	0	0.227766	0	0	1.37383	0	0	0.20939	0	0	0
880	1700	69.3333	0	0	0.204594	0	0	1.32954	0	0	0.189936	0	0	0
870	1700	67.6937	0	0	0.184522	0	0	1.28961	0	0	0.172413	0	0	0
860	1700	66.1226	0	0	0.16714	0	0	1.25411	0	0	0.156568	0	0	0
850	1700	64.5456	0	0	0.154751	0	0	1.19332	0.093407	0	0.141827	0	0	0
840	1700	61.9217	0	0	0.186395	0	0	0.6382	1.68404	0	0.121837	0	0	0
830	1700	59.4978	0	0	0.168871	0	0	0.607885	1.5444	0	0.109138	0	0	0
820	1700	57.2521	0	0	0.153366	0	0	0.580578	1.4198	0	0.097963	0	0	0
810	1700	55.1662	0	0	0.139596	0	0	0.555877	1.30814	0	0.088093	0	0	0
800	1700	53.224	0	0	0.127324	0	0	0.53345	1.20771	0	0.079344	0	0	0
790	1700	51.2482	0	0	0.229792	0	0	0.625184	1.09789	0	0	0.025439	0	0
780	1700	48.1438	0	0	0.175807	0	0	1.19648	1.54879	0	0	0.036592	0	0.149476
770	1700	45.3825	0	0	0.157606	0	0	1.09423	1.34071	0	0	0.030385	0	0.141288
760	1700	43.006	0	0	0.137242	0	0	0.958782	1.13544	0	0	0.025265	0	0.122769
750	1700	40.9373	0	0	0.120221	0	0	0.847879	0.974451	0	0	0.021262	0	0.107996
740	1700	39.119	0	0	0.105725	0	0	0.755728	0.845968	0	0	0.018086	0	0.096032
730	1700	37.5072	0	0	0.093201	0	0	0.678224	0.741868	0	0	0.015533	0	0.086222
720	1700	36.0679	0	0	0.082269	0	0	0.612394	0.656393	0	0	0.013457	0	0.078098
710	1700	32.1098	0	0	0.107247	0	0	1.01839	1.26192	1.30234	0	0.018883	0.059729	0.192607
700	1700	9.58775	0	0	0.561733	0	0	3.58565	5.8922	10.7857	0	0.054658	0.621277	1.0239
Residual bulk composition
Temperature (oC)	SiO2	TiO2	Al2O3	Fe2O3	FeO	MnO	MgO	CaO	Na2O	K2O	P2O5	H2O
1100	---
1090	---
1080	---
1070	---
1060	1.57907e-12	21.9057	3.32568	25.2346	44.9872	0	4.54694	5.02439e-14	0	0	0	0
1050	7.06793e-13	21.3844	3.38653	26.13	44.6245	0	4.47456	-4.94762e-14	0	0	0	0
1040	28.9942	9.39206	2.5504	12.4396	31.6769	0	14.2526	0.68434	0.00995237	0	0	0
1030	28.6406	9.27937	2.58628	12.9326	32.0012	0	13.8363	0.713472	0.0101716	0	0	0
1020	28.519	9.07662	2.61563	13.3108	32.2095	0	13.5094	0.748405	0.0104801	0	0	0
1010	28.3923	8.8786	2.64531	13.6917	32.4081	0	13.1897	0.783515	0.010797	0	0	0
1000	28.2622	8.68521	2.6751	14.0729	32.5969	0	12.8777	0.818861	0.0111238	0	0	0
990	28.131	8.49644	2.70474	14.4519	32.776	0	12.5739	0.85454	0.0114624	0	0	0
980	28.0007	8.31229	2.73398	14.8261	32.9455	0	12.279	0.890688	0.011815	0	0	0
970	37.4597	5.20069	12.317	9.68819	21.0867	0	7.60393	4.68386	1.78637	0.173464	0	0
960	47.0868	2.28978	21.4684	4.39104	9.38391	0	3.23539	8.14186	3.63404	0.368825	0	0
950	47.645	2.17368	21.5449	4.28927	9.08378	0	3.03268	8.02434	3.80362	0.402664	0	0
940	48.2085	2.0622	21.611	4.18288	8.78361	0	2.84135	7.89698	3.97404	0.439467	0	0
930	48.7767	1.95521	21.6667	4.07179	8.48398	0	2.66087	7.76038	4.14477	0.479582	0	0
920	49.3492	1.85261	21.7122	3.956	8.1854	0	2.49074	7.61507	4.31531	0.523428	0	0
910	48.7119	2.00876	18.545	4.29372	7.94924	0	3.12471	11.0977	3.79453	0.474403	0	0
900	49.3066	2.05855	20.9283	4.60419	6.95129	0	1.7111	9.26774	4.55949	0.612774	0	0
890	50.0646	1.91949	20.9507	4.46165	6.62263	0	1.60961	8.91888	4.76997	0.682476	0	0
880	50.8257	1.78717	20.9542	4.31272	6.3002	0	1.51531	8.5663	4.97652	0.761875	0	0
870	51.5921	1.6611	20.9386	4.15643	5.98345	0	1.42771	8.20887	5.17819	0.853527	0	0
860	52.3677	1.54068	20.903	3.99155	5.67134	0	1.34627	7.8444	5.37383	0.961293	0	0
850	53.7417	1.36582	20.6513	3.6491	5.15395	0	1.2355	7.11046	5.40619	1.68598	0	0
840	59.8828	0.724665	18.6893	1.91058	2.95421	0	0.857491	3.38794	3.93727	7.65573	0	0
830	60.0059	0.708218	18.7324	1.84728	2.88613	0	0.830408	3.37079	3.97967	7.63926	0	0
820	60.1289	0.691443	18.776	1.78496	2.81795	0	0.803771	3.35304	4.02388	7.62007	0	0
810	60.2518	0.674399	18.8201	1.72359	2.74973	0	0.777584	3.33466	4.06998	7.59809	0	0
800	60.3748	0.657145	18.8645	1.66313	2.68158	0	0.751853	3.31563	4.11806	7.57324	0	0
790	61.1552	0.635403	18.5672	0.176915	4.37658	0.00409822	1.46812	2.54259	4.17189	6.90198	0	0
780	58.8108	0.579529	19.011	0.128583	2.44067	0.00406701	0.671488	2.68133	4.54784	6.31402	0	4.81071
770	58.7235	0.54075	18.9278	0.121879	2.50226	0.00411724	0.624722	2.63164	4.64489	6.16711	0	5.11132
760	58.7788	0.522267	18.8661	0.118189	2.5854	0.00429701	0.582558	2.5709	4.72551	6.08654	0	5.15944
750	58.8299	0.50491	18.8096	0.114127	2.65383	0.00447472	0.539558	2.51292	4.79715	6.02088	0	5.21265
740	58.8775	0.488727	18.7586	0.109699	2.70522	0.00465391	0.49652	2.45739	4.86114	5.96858	0	5.27202
730	58.9219	0.473736	18.713	0.104937	2.73799	0.00483785	0.454186	2.40405	4.91865	5.92814	0	5.33866
720	58.9629	0.459917	18.6727	0.0998946	2.75134	0.00502946	0.413201	2.35264	4.97068	5.89803	0	5.41366
710	71.0822	0.235178	12.0836	0.0487239	1.34451	0.00296429	0.177969	2.23427	3.15713	4.10478	0.639141	4.88947
700	76.2405	0.137362	8.67219	0.0715964	0.698913	0.00474872	0.0831417	2.79577	2.22975	3.30185	1.16908	4.59504
Bulk composition
Temperature (oC)	SiO2	TiO2	Al2O3	Fe2O3	FeO	MnO	MgO	CaO	Na2O	K2O	P2O5	H2O
1100	59.7739	1.61279	14.4344	1.26757	7.17663	0.131039	1.84462	4.17308	3.35661	3.28605	0.423356	2.51998
1090	59.7733	1.61277	14.4343	1.27633	7.16867	0.131038	1.84461	4.17305	3.35658	3.28602	0.423352	2.51995
1080	59.7728	1.61276	14.4342	1.28548	7.16036	0.131036	1.84459	4.17301	3.35655	3.28599	0.423349	2.51993
1070	59.7722	1.61274	14.434	1.29502	7.1517	0.131035	1.84457	4.17297	3.35652	3.28596	0.423344	2.51991
1060	59.766	1.61257	14.4325	1.39815	7.05804	0.131022	1.84438	4.17254	3.35617	3.28562	0.423301	2.51965
1050	60.1108	1.49312	14.4962	1.36686	6.73628	0.131777	1.82829	4.19661	3.37553	3.30457	0.425743	2.53418
1040	60.4668	1.37355	14.5618	1.30079	6.43376	0.132558	1.81225	4.22146	3.39552	3.32414	0.428264	2.54919
1030	60.8264	1.28059	14.6997	1.25185	6.06876	0.134083	1.66799	4.26209	3.43446	3.36238	0.43319	2.57851
1020	61.1683	1.19436	14.8291	1.2032	5.7195	0.135516	1.53678	4.29998	3.47108	3.39833	0.437822	2.60608
1010	61.4936	1.11464	14.9514	1.15518	5.38451	0.136876	1.41568	4.33554	3.50579	3.43242	0.442213	2.63222
1000	61.803	1.04097	15.067	1.10785	5.06351	0.138164	1.30392	4.36891	3.53867	3.46472	0.446374	2.65699
990	62.0971	0.972897	15.1762	1.06126	4.75627	0.139383	1.20083	4.40019	3.56982	3.49531	0.450315	2.68045
980	62.3766	0.910019	15.2793	1.01545	4.46252	0.140538	1.10576	4.42951	3.5993	3.52426	0.454046	2.70266
970	62.6418	0.851955	15.3766	0.974828	4.17811	0.14163	1.01809	4.45695	3.62717	3.55165	0.457574	2.72366
960	62.9536	0.797148	15.4139	0.947978	3.89029	0.143402	0.935075	4.45371	3.65004	3.59389	0.463298	2.75773
950	63.5358	0.741948	15.1882	0.897009	3.61838	0.1487	0.849982	4.31669	3.65029	3.71301	0.480415	2.85961
940	64.0897	0.691676	14.9632	0.848252	3.36313	0.153918	0.773316	4.18586	3.64457	3.82915	0.497275	2.95997
930	64.6171	0.645852	14.7391	0.801591	3.12351	0.159065	0.704141	4.06112	3.63321	3.94244	0.513901	3.05894
920	65.1196	0.604052	14.5162	0.756929	2.89859	0.164145	0.641645	3.94236	3.61654	4.05301	0.530316	3.15664
910	65.5983	0.5659	14.2944	0.72029	2.682	0.169165	0.58511	3.82942	3.59481	4.16091	0.546534	3.25318
900	66.0657	0.525646	14.1742	0.6892	2.47316	0.173886	0.514071	3.62577	3.58891	4.26375	0.561786	3.34396
890	66.4991	0.485675	13.9962	0.651733	2.29823	0.178422	0.482844	3.47801	3.5632	4.35893	0.57644	3.43119
880	66.9126	0.449315	13.818	0.615927	2.13385	0.182951	0.454259	3.33939	3.53217	4.45219	0.591072	3.51828
870	67.3074	0.416239	13.6396	0.581684	1.97941	0.187481	0.428018	3.20949	3.496	4.54351	0.605708	3.60541
860	67.6846	0.386155	13.4613	0.54892	1.83439	0.192023	0.403852	3.08799	3.45484	4.63283	0.620381	3.69274
850	68.0453	0.358806	13.2829	0.517239	1.69861	0.196586	0.381521	2.97461	3.40883	4.72	0.635123	3.7805
840	68.3918	0.334305	13.1016	0.481715	1.57792	0.201387	0.360734	2.87328	3.35966	4.79413	0.650636	3.87283
830	68.7491	0.317936	12.8637	0.459053	1.48653	0.209921	0.3398	2.85156	3.33496	4.6723	0.678206	4.03694
820	69.1022	0.302223	12.6235	0.437384	1.39922	0.218473	0.319937	2.83051	3.30847	4.55086	0.705837	4.20141
810	69.4511	0.287157	12.3811	0.416653	1.31584	0.227043	0.301092	2.81014	3.28019	4.42993	0.733523	4.36621
800	69.796	0.272729	12.1366	0.39681	1.23626	0.235628	0.283216	2.79045	3.25011	4.3096	0.761258	4.5313
790	70.1408	0.258943	11.8908	0.32294	1.20982	0.244239	0.266278	2.7716	3.21841	4.1902	0.789081	4.69691
780	70.4873	0.245356	11.6333	0.304357	1.1109	0.253502	0.220141	2.78048	3.18164	4.08555	0.819497	4.87796
770	71.2402	0.224795	11.1574	0.29138	1.04862	0.269591	0.191266	2.7869	3.0935	3.94176	0.872334	4.88221
760	72.0017	0.206618	10.6844	0.2782	0.983028	0.28575	0.165114	2.79636	2.99905	3.80625	0.925406	4.86815
750	72.7321	0.190281	10.232	0.264349	0.916727	0.30131	0.142259	2.80882	2.90358	3.68012	0.976537	4.85192
740	73.4342	0.175544	9.79823	0.250061	0.850571	0.316319	0.122387	2.82377	2.8078	3.56169	1.02588	4.83353
730	74.1103	0.162203	9.38134	0.23555	0.785337	0.330816	0.105192	2.84079	2.71225	3.44966	1.07356	4.81296
720	74.7624	0.150086	8.9799	0.221011	0.721714	0.344835	0.0903812	2.85955	2.61732	3.34298	1.11969	4.79017
710	75.3929	0.139048	8.59271	0.195141	0.670617	0.358412	0.0776784	2.87979	2.5233	3.24088	1.16437	4.76511
700	75.9259	0.128711	8.16262	0.121093	0.673141	0.40224	0.0655191	2.9611	2.44523	3.13441	1.23037	4.74968

## Sheet: Lower Crust PM
Liquid Thermodynamic Data
Pressure (bars)	Temperature (oC)	F	phi	S	H	V	dVdP*10^6	dVdT*10^6	Cp	mass	fO2-(QFM+1.0)	rhol	rhos	viscosity	aH2O
6250	1300	1	1	279.891	-1.18797e+06	37.3622	-224.498	2883.79	148.56	100.222	0	2.68244	0	2.304	0.0182203
6250	1290	1	1	278.945	-1.18946e+06	37.3339	-224.612	2883.35	148.559	100.223	0	2.6845	0	2.347	0.0182035
6250	1280	1	1	277.993	-1.19096e+06	37.3056	-224.729	2882.88	148.558	100.223	0	2.68655	0	2.39	0.0181876
6250	1270	0.996819	0.997363	276.954	-1.19258e+06	37.2633	-224.481	2878.35	148.44	100.224	0	2.68815	3.24375	2.439	0.0182404
6250	1260	0.983297	0.986145	275.649	-1.19459e+06	37.1756	-223.044	2860.57	147.94	100.224	0	2.68818	3.25015	2.507	0.0185184
6250	1250	0.970066	0.975162	274.349	-1.19657e+06	37.0895	-221.643	2843.1	147.452	100.224	0	2.68809	3.25667	2.576	0.0187967
6250	1240	0.9416	0.951603	272.709	-1.19905e+06	36.9461	-218.592	2806.72	146.434	100.223	0	2.68417	3.27336	2.67	0.019507
6250	1230	0.917769	0.931797	271.141	-1.20141e+06	36.8158	-216.079	2776.43	145.568	100.223	0	2.68129	3.28222	2.76	0.0201261
6250	1220	0.889197	0.907957	269.428	-1.20399e+06	36.663	-213.119	2741.06	144.526	100.223	0	2.67716	3.2908	2.86	0.020945
6250	1210	0.854123	0.87846	267.485	-1.20692e+06	36.4784	-209.595	2699.03	143.229	100.226	0	2.67143	3.29771	2.975	0.0220812
6250	1200	0.820511	0.850061	265.599	-1.20977e+06	36.3014	-206.222	2657.39	138.043	100.23	0	2.66506	3.30519	3.095	0.0232781
6250	1190	0.751671	0.784389	263.068	-1.21347e+06	36.115	-196.338	2556.3	136.17	100.229	0	2.6595	3.19639	3.188	0.0270582
6250	1180	0.685647	0.720406	260.634	-1.21699e+06	35.9461	-186.537	2458.24	134.425	100.227	0	2.65372	3.13488	3.275	0.0317458
6250	1170	0.627691	0.663867	258.39	-1.2202e+06	35.7949	-177.835	2371.98	132.903	100.225	0	2.6474	3.10131	3.362	0.0369762
6250	1160	0.576384	0.613527	256.3	-1.22318e+06	35.6582	-170.049	2295.38	131.563	100.223	0	2.6405	3.08078	3.449	0.0427968
6250	1150	0.530678	0.568462	254.339	-1.22595e+06	35.5337	-163.043	2226.77	130.369	100.221	0	2.63298	3.06739	3.538	0.0492502
6250	1140	0.489789	0.527966	252.486	-1.22854e+06	35.4199	-156.715	2164.94	129.3	100.219	0	2.62485	3.05829	3.628	0.0563712
6250	1130	0.453108	0.491488	250.726	-1.23098e+06	35.3156	-150.983	2108.95	128.338	100.217	0	2.61615	3.05192	3.72	0.0641836
6250	1120	0.420149	0.458582	249.047	-1.23329e+06	35.2197	-145.783	2058.04	127.468	100.214	0	2.60694	3.04738	3.814	0.0726975
6250	1110	0.386097	0.426002	247.296	-1.23617e+06	35.176	-141.216	1993.36	126.51	100.241	0	2.58277	3.04783	4.023	0.08248
6250	1100	0.359592	0.399604	245.745	-1.2384e+06	35.1146	-137.162	1947.72	125.784	100.247	0	2.56901	3.04512	4.155	0.0922428
6250	1090	0.336479	0.376377	244.272	-1.24048e+06	35.0583	-133.546	1907.64	125.143	100.251	0	2.55642	3.04249	4.281	0.102376
6250	1080	0.316181	0.355811	242.862	-1.24242e+06	35.0063	-130.302	1872.13	124.572	100.253	0	2.54487	3.04003	4.4	0.112835
6250	1070	0.298236	0.337493	241.503	-1.24426e+06	34.9578	-127.375	1840.42	124.059	100.253	0	2.53424	3.03776	4.514	0.123578
6250	1060	0.28227	0.321082	240.188	-1.24601e+06	34.9121	-124.72	1811.87	123.592	100.252	0	2.52445	3.03572	4.622	0.134567
6250	1050	0.26798	0.3063	238.907	-1.24768e+06	34.869	-122.299	1785.98	123.165	100.251	0	2.51539	3.03389	4.727	0.145771
6250	1040	0.255119	0.292916	237.655	-1.2493e+06	34.8278	-120.078	1762.34	122.77	100.249	0	2.50699	3.03227	4.827	0.15716
6250	1030	0.243482	0.280737	236.427	-1.25086e+06	34.7884	-118.031	1740.61	122.403	100.246	0	2.49919	3.03084	4.924	0.168712
6250	1020	0.232898	0.269601	235.219	-1.25238e+06	34.7503	-116.135	1720.51	122.058	100.243	0	2.49194	3.02961	5.017	0.180406
6250	1010	0.22321	0.259358	234.02	-1.25386e+06	34.713	-114.397	1710.07	122.013	100.239	0	2.48517	3.02858	5.107	0.192247
6250	1000	0.214312	0.249905	232.838	-1.2553e+06	34.6768	-112.741	1692.85	121.714	100.235	0	2.47885	3.0277	5.195	0.204205
6250	990	0.206093	0.241132	231.666	-1.25672e+06	34.6411	-111.18	1676.66	121.428	100.23	0	2.47294	3.02698	5.279	0.216286
6250	980	0.198458	0.232949	230.501	-1.2581e+06	34.6058	-109.7	1661.37	121.155	100.225	0	2.46738	3.02642	5.36	0.228498
6250	970	0.191325	0.22527	229.341	-1.25946e+06	34.5706	-108.285	1646.85	120.891	100.22	0	2.46215	3.02601	5.439	0.240859
6250	960	0.184053	0.217444	228.153	-1.26079e+06	34.5277	-106.755	1632.12	120.621	100.211	0	2.45665	3.02617	5.506	0.254142
6250	950	0.177056	0.20988	226.962	-1.26208e+06	34.4833	-105.235	1617.93	120.357	100.2	0	2.45131	3.02648	5.567	0.267911
6250	940	0.170455	0.202705	225.775	-1.26336e+06	34.4398	-103.769	1604.49	120.101	100.19	0	2.44629	3.0268	5.624	0.281965
6250	930	0.164212	0.195882	224.593	-1.26461e+06	34.3971	-102.352	1591.72	119.853	100.179	0	2.44155	3.02712	5.677	0.296304
6250	920	0.158294	0.189378	223.413	-1.26585e+06	34.3551	-100.978	1579.54	119.612	100.168	0	2.43709	3.02746	5.725	0.310924
6250	910	0.15267	0.183164	222.235	-1.26707e+06	34.3139	-99.6434	1567.9	119.377	100.156	0	2.43289	3.02779	5.769	0.325823
6250	900	0.147611	0.177728	221.005	-1.26828e+06	34.2441	-98.324	1556.45	119.126	100.141	0	2.4288	3.03144	5.814	0.340116
6250	890	0.144537	0.175611	219.436	-1.26951e+06	33.9903	-96.8725	1543.3	118.737	100.104	0	2.42394	3.05608	5.881	0.349143
6250	880	0.143444	0.175301	218.072	-1.2709e+06	33.8433	-96.3372	1532.46	118.458	100.092	0	2.42005	3.07174	6.006	0.353412
6250	870	0.142757	0.175329	216.754	-1.2723e+06	33.7207	-95.9893	1522.33	118.208	100.084	0	2.41665	3.08527	6.141	0.356751
6250	860	0.142074	0.1753	215.447	-1.27368e+06	33.6055	-95.6555	1512.54	117.967	100.078	0	2.41357	3.098	6.271	0.360191
6250	850	0.141391	0.175215	214.148	-1.27505e+06	33.497	-95.334	1503.08	117.737	100.072	0	2.41077	3.11	6.398	0.36375
6250	840	0.140707	0.175077	212.857	-1.27641e+06	33.3947	-95.0234	1493.96	117.516	100.066	0	2.40824	3.12133	6.523	0.367439
6250	830	0.138706	0.173342	211.537	-1.2778e+06	33.2864	-94.2679	1482.66	117.289	100.062	0	2.40543	3.13204	6.606	0.375033
6250	820	0.130552	0.164261	210.073	-1.27934e+06	33.1326	-91.3889	1460.15	116.995	100.058	0	2.4002	3.14172	6.499	0.401476
6250	810	0.122831	0.155534	208.634	-1.28085e+06	32.9921	-88.654	1439.23	116.726	100.054	0	2.39501	3.15011	6.383	0.428559
6250	800	0.115468	0.147099	207.214	-1.28233e+06	32.863	-86.0385	1419.76	116.48	100.051	0	2.38982	3.1574	6.254	0.456267
6250	790	0.108396	0.138897	205.808	-1.28379e+06	32.7434	-83.5204	1401.66	116.26	100.048	0	2.38454	3.16374	6.113	0.484577
6250	780	0.101554	0.130868	204.413	-1.28522e+06	32.6322	-81.0794	1384.91	116.068	100.045	0	2.3791	3.16925	5.956	0.513452
6250	770	0.0948796	0.122951	203.024	-1.28664e+06	32.528	-78.6957	1369.57	115.909	100.043	0	2.37339	3.17402	5.781	0.54284
6250	760	0.0883079	0.115075	201.639	-1.28804e+06	32.4299	-76.3489	1355.79	115.791	100.04	0	2.36726	3.17813	5.582	0.572667
6250	750	0.0714572	0.093348	199.703	-1.28999e+06	32.3483	-69.6123	1290.14	115.691	100.038	0	2.3673	3.16718	5.298	0.591704
6250	740	0.0773645	0.100693	199.296	-1.2904e+06	32.5707	-73.8904	1369.5	116.191	100.035	0	2.35978	3.151	5.318	0.63054
6250	730	0.0474607	0.061901	196.692	-1.29293e+06	32.461	-61.6956	1240.29	116.114	100.029	0	2.36266	3.12895	4.51	0.643135
Liquid Compositions
Temperature (oC)	SiO2	TiO2	Al2O3	Fe2O3	FeO	MnO	MgO	CaO	Na2O	K2O	H2O
1300	53.7008	0.957874	15.9246	2.21076	8.49745	0.219513	6.20622	8.39137	2.76386	0.628605	0.498893
1290	53.7005	0.957868	15.9245	2.21704	8.49174	0.219511	6.20618	8.39132	2.76385	0.628601	0.498889
1280	53.7001	0.957861	15.9244	2.22366	8.48571	0.21951	6.20614	8.39126	2.76383	0.628596	0.498886
1270	53.6992	0.960626	15.9647	2.23134	8.47398	0.220209	6.13326	8.41301	2.77251	0.630599	0.500475
1260	53.6995	0.972589	16.1384	2.24045	8.43881	0.223237	5.82488	8.50539	2.81009	0.639271	0.507358
1250	53.7043	0.984603	16.3115	2.2478	8.39455	0.226282	5.52597	8.59497	2.84781	0.64799	0.514278
1240	53.8283	1.00877	16.635	2.22232	8.23292	0.233125	5.14122	8.57416	2.92679	0.667585	0.529829
1230	53.9249	1.02999	16.9246	2.20767	8.11767	0.239179	4.76959	8.56103	2.9969	0.68492	0.543588
1220	54.0796	1.05494	17.2672	2.18333	7.99245	0.246863	4.38694	8.43771	3.08301	0.706925	0.561052
1210	54.3331	1.08115	17.6756	2.14921	7.88827	0.256993	4.00576	8.09868	3.19123	0.735933	0.584074
1200	54.6307	1.10392	18.0692	2.10776	7.75322	0.267511	3.65127	7.74152	3.30086	0.766053	0.607979
1190	55.0424	1.18516	17.9177	2.12942	7.81296	0.292013	3.32423	7.41232	3.39069	0.829467	0.663667
1180	55.4689	1.27681	17.6968	2.1505	7.859	0.320139	3.03026	7.1095	3.46049	0.900003	0.727589
1170	55.8982	1.36778	17.5019	2.15814	7.84926	0.349705	2.76616	6.82806	3.51379	0.972207	0.794783
1160	56.3342	1.45729	17.3332	2.15229	7.78445	0.380841	2.52867	6.56529	3.55197	1.04625	0.865549
1150	56.78	1.54423	17.1901	2.13315	7.66648	0.41365	2.315	6.31881	3.57617	1.12223	0.940114
1140	57.238	1.62717	17.0714	2.10122	7.4987	0.448192	2.12273	6.08649	3.58734	1.20016	1.01862
1130	57.7093	1.70441	16.9751	2.05731	7.28593	0.484485	1.94969	5.86647	3.58627	1.27997	1.1011
1120	58.1941	1.774	16.8989	2.00257	7.03421	0.522504	1.79391	5.65712	3.57367	1.3615	1.18751
1110	59.6134	1.68653	16.8135	1.78028	6.12451	0.568432	1.66342	5.47591	3.52396	1.4582	1.29189
1100	60.4129	1.67893	16.7396	1.66317	5.65511	0.610295	1.54438	5.29523	3.47013	1.54313	1.38704
1090	61.1531	1.66845	16.6706	1.55409	5.22842	0.652194	1.43779	5.12238	3.40497	1.62576	1.48226
1080	61.8405	1.65538	16.6061	1.45255	4.83945	0.694051	1.34166	4.95611	3.33081	1.70606	1.57739
1070	62.4807	1.6399	16.5458	1.35807	4.48395	0.735811	1.25441	4.79544	3.24958	1.78406	1.6723
1060	63.0785	1.62211	16.4896	1.27018	4.15828	0.777435	1.17477	4.6396	3.16287	1.85981	1.7669
1050	63.638	1.60208	16.437	1.18842	3.85932	0.818902	1.10173	4.48801	3.07201	1.93337	1.86114
1040	64.1627	1.57981	16.388	1.11239	3.58438	0.860203	1.03443	4.34021	2.97808	2.00483	1.95501
1030	64.6556	1.55526	16.3421	1.04169	3.33115	0.901341	0.972191	4.19585	2.88203	2.07427	2.0485
1020	65.1193	1.52835	16.2992	0.975962	3.09762	0.942336	0.914417	4.05468	2.78466	2.14178	2.14167
1010	65.5559	1.49901	16.259	0.914871	2.88205	0.983272	0.860639	3.91667	2.6863	2.20756	2.23471
1000	65.9674	1.46698	16.2214	0.858123	2.68291	1.02414	0.810395	3.78146	2.58804	2.27161	2.32759
990	66.3552	1.43203	16.1861	0.80545	2.49889	1.06503	0.763328	3.64905	2.49029	2.33411	2.42052
980	66.7207	1.39384	16.1529	0.756611	2.32884	1.10606	0.71911	3.5194	2.39361	2.3952	2.51376
970	67.0646	1.35199	16.1216	0.711401	2.17177	1.14736	0.677454	3.39252	2.29854	2.45507	2.60763
960	67.403	1.2704	16.0688	0.674442	2.03937	1.19279	0.634519	3.26884	2.2192	2.51771	2.71089
950	67.7169	1.18231	16.0154	0.640904	1.91834	1.24006	0.593784	3.14926	2.14417	2.58047	2.81832
940	68.0018	1.09875	15.9686	0.609142	1.80416	1.28822	0.556124	3.03365	2.06947	2.64231	2.92777
930	68.2582	1.01958	15.9284	0.579048	1.6964	1.33734	0.521274	2.92185	1.99523	2.70326	3.0394
920	68.4869	0.944673	15.8947	0.550523	1.59465	1.38749	0.488997	2.8137	1.92156	2.76333	3.1534
910	68.6885	0.873892	15.8677	0.523478	1.49858	1.43877	0.459075	2.70906	1.84857	2.82252	3.26993
900	68.9205	0.81041	15.7922	0.498198	1.40719	1.4883	0.430416	2.60371	1.79058	2.87598	3.38249
890	69.5042	0.771654	15.354	0.476644	1.31695	1.52052	0.398597	2.47531	1.8302	2.8962	3.45573
880	70.22	0.742472	14.9706	0.437244	1.18642	1.53229	0.377348	2.36448	1.79167	2.89492	3.48249
870	70.9351	0.715365	14.605	0.398052	1.06128	1.53978	0.35907	2.25876	1.73969	2.88848	3.4995
860	71.6187	0.688691	14.2493	0.362468	0.949313	1.54729	0.342119	2.15588	1.68868	2.88094	3.51656
850	72.273	0.662479	13.9036	0.330137	0.849054	1.55485	0.326355	2.05597	1.63842	2.87238	3.53375
840	72.8999	0.636754	13.5674	0.300743	0.759227	1.56249	0.311659	1.95911	1.58874	2.86286	3.55111
830	73.3884	0.608166	13.271	0.275724	0.682274	1.58512	0.298923	1.86248	1.55925	2.86616	3.60254
820	73.2974	0.564497	13.1294	0.260973	0.629585	1.68418	0.291611	1.7574	1.6263	2.93098	3.82768
810	73.1747	0.522755	12.9908	0.247544	0.582035	1.79011	0.28462	1.65937	1.6935	2.98621	4.06844
800	73.017	0.482764	12.8548	0.235369	0.539182	1.90433	0.277979	1.56802	1.7618	3.03076	4.32802
790	72.8196	0.444356	12.7215	0.2244	0.500661	2.02862	0.271708	1.48298	1.83236	3.06334	4.6105
780	72.576	0.407365	12.5905	0.214616	0.466177	2.16535	0.26582	1.40394	1.90662	3.08235	4.92126
770	72.2766	0.37162	12.4617	0.206025	0.435507	2.31774	0.260321	1.33063	1.98637	3.08588	5.26759
760	71.9076	0.336936	12.3348	0.198672	0.40851	2.49028	0.255206	1.26283	2.07399	3.07144	5.65973
750	71.1317	0.305522	12.2315	0.19712	0.395348	3.07761	0.240697	1.22857	2.0823	3.05996	6.04972
740	70.6374	0.226691	12.9027	0.164677	0.327438	2.84268	0.191122	1.35318	1.77652	3.11694	6.46063
730	68.514	0.202987	12.5313	0.188983	0.367248	4.59133	0.186508	1.3512	1.9674	2.68037	7.41875
Solids compositions
Temperature	1300	P	6250
Temperature	1290	P	6250
Temperature	1280	P	6250
Temperature	1270	P	6250
orthopyroxene_0	0.318795	opx	Na0.00Ca0.06Fe''0.31Mg1.53Fe'''0.04Ti0.00Al0.14Si1.91O6	53.8725	0.0897373	3.26631	1.57035	0	10.5677	0	29.034	0	0	1.56156	0.037758	0	0	0	0	0	0	0
Temperature	1260	P	6250
orthopyroxene_0	1.67409	opx	Na0.00Ca0.06Fe''0.32Mg1.52Fe'''0.04Ti0.00Al0.14Si1.91O6	53.7147	0.0905413	3.32387	1.59298	0	10.9207	0	28.6478	0	0	1.66983	0.0396546	0	0	0	0	0	0	0
Temperature	1250	P	6250
orthopyroxene_0	3.0001	opx	Na0.00Ca0.07Fe''0.34Mg1.50Fe'''0.04Ti0.00Al0.14Si1.91O6	53.555	0.0910696	3.37981	1.61384	0	11.2831	0	28.2473	0	0	1.78833	0.0416624	0	0	0	0	0	0	0
Temperature	1240	P	6250
clinopyroxene_0	5.85303	cpx	Na0.01Ca0.21Fe''0.38Mg1.27Fe'''0.06Ti0.00Al0.19Si1.88O6	51.6348	0.137111	4.46852	2.21423	0	12.5898	0	23.3764	0	0	5.4427	0.136446	0	0	0	0	0	0	0
Temperature	1230	P	6250
clinopyroxene_0	8.24145	cpx	Na0.01Ca0.25Fe''0.39Mg1.21Fe'''0.06Ti0.00Al0.20Si1.87O6	51.1939	0.152871	4.76245	2.36066	0	12.631	0	22.2395	0	0	6.49691	0.162706	0	0	0	0	0	0	0
Temperature	1220	P	6250
clinopyroxene_0	11.1051	cpx	Na0.01Ca0.31Fe''0.38Mg1.14Fe'''0.07Ti0.00Al0.22Si1.86O6	50.654	0.178787	5.14865	2.56033	0	12.4323	0	20.8052	0	0	8.01842	0.202374	0	0	0	0	0	0	0
Temperature	1210	P	6250
clinopyroxene_0	10.795	cpx	Na0.02Ca0.32Fe''0.39Mg1.11Fe'''0.07Ti0.01Al0.24Si1.85O6	50.2605	0.198679	5.44633	2.70381	0	12.8144	0	20.1714	0	0	8.18476	0.220047	0	0	0	0	0	0	0
clinopyroxene_1	3.8257	cpx	Na0.03Ca0.62Fe''0.28Mg0.88Fe'''0.09Ti0.01Al0.27Si1.82O6	49.1992	0.34044	6.29419	3.305	0	8.93876	0	16.0321	0	0	15.5145	0.375806	0	0	0	0	0	0	0
Temperature	1200	P	6250
clinopyroxene_0	10.085	cpx	Na0.02Ca0.31Fe''0.41Mg1.09Fe'''0.08Ti0.01Al0.25Si1.84O6	49.9237	0.214848	5.70156	2.81901	0	13.3739	0	19.7689	0	0	7.96772	0.230369	0	0	0	0	0	0	0
clinopyroxene_1	7.9051	cpx	Na0.03Ca0.62Fe''0.28Mg0.86Fe'''0.10Ti0.01Al0.29Si1.81O6	48.7923	0.385517	6.6403	3.49288	0	9.12075	0	15.4774	0	0	15.6841	0.406742	0	0	0	0	0	0	0
Temperature	1190	P	6250
clinopyroxene_0	12.6706	cpx	Na0.02Ca0.31Fe''0.43Mg1.07Fe'''0.08Ti0.01Al0.25Si1.84O6	49.6968	0.23486	5.72095	2.91578	0	14.042	0	19.3636	0	0	7.7892	0.236797	0	0	0	0	0	0	0
clinopyroxene_1	8.41807	cpx	Na0.03Ca0.63Fe''0.29Mg0.83Fe'''0.10Ti0.01Al0.29Si1.80O6	48.5139	0.44376	6.72168	3.6636	0	9.39776	0	14.9925	0	0	15.8358	0.431034	0	0	0	0	0	0	0
feldspar_0	3.80101	K0.01Na0.35Ca0.65Al1.65Si2.35O8	51.8495	0	30.7887	0	0	0	0	0	0	0	13.3026	3.92534	0.133853	0	0	0	0	0	0
Temperature	1180	P	6250
clinopyroxene_0	15.2827	cpx	Na0.02Ca0.30Fe''0.46Mg1.05Fe'''0.08Ti0.01Al0.25Si1.84O6	49.4969	0.255472	5.69826	3.00135	0	14.7271	0	18.9809	0	0	7.59871	0.24127	0	0	0	0	0	0	0
clinopyroxene_1	8.51506	cpx	Na0.03Ca0.64Fe''0.30Mg0.81Fe'''0.11Ti0.01Al0.30Si1.80O6	48.2539	0.511272	6.76294	3.82971	0	9.66122	0	14.525	0	0	16.0019	0.454062	0	0	0	0	0	0	0
feldspar_0	7.70884	K0.01Na0.36Ca0.63Al1.63Si2.37O8	52.2567	0	30.5109	0	0	0	0	0	0	0	12.9785	4.10453	0.149403	0	0	0	0	0	0
Temperature	1170	P	6250
clinopyroxene_0	17.451	cpx	Na0.02Ca0.29Fe''0.48Mg1.03Fe'''0.09Ti0.01Al0.25Si1.83O6	49.3076	0.275855	5.67344	3.07659	0	15.406	0	18.6226	0	0	7.39347	0.244454	0	0	0	0	0	0	0
clinopyroxene_1	8.7425	cpx	Na0.03Ca0.65Fe''0.31Mg0.78Fe'''0.11Ti0.02Al0.30Si1.79O6	47.9912	0.587785	6.80955	3.99205	0	9.89085	0	14.069	0	0	16.1826	0.477033	0	0	0	0	0	0	0
feldspar_0	11.1211	K0.01Na0.38Ca0.62Al1.62Si2.38O8	52.6391	0	30.2498	0	0	0	0	0	0	0	12.6737	4.27208	0.165292	0	0	0	0	0	0
Temperature	1160	P	6250
clinopyroxene_0	19.2649	cpx	Na0.02Ca0.29Fe''0.50Mg1.02Fe'''0.09Ti0.01Al0.25Si1.83O6	49.1304	0.295839	5.64611	3.1404	0	16.074	0	18.2886	0	0	7.17822	0.24643	0	0	0	0	0	0	0
clinopyroxene_1	9.06968	cpx	Na0.04Ca0.66Fe''0.32Mg0.76Fe'''0.12Ti0.02Al0.30Si1.79O6	47.7264	0.674525	6.86106	4.1488	0	10.0866	0	13.6278	0	0	16.3751	0.499782	0	0	0	0	0	0	0
feldspar_0	14.1215	K0.01Na0.39Ca0.60Al1.60Si2.40O8	52.9973	0	30.0049	0	0	0	0	0	0	0	12.3882	4.42826	0.181392	0	0	0	0	0	0
Temperature	1150	P	6250
clinopyroxene_0	20.7943	cpx	Na0.02Ca0.28Fe''0.52Mg1.00Fe'''0.09Ti0.01Al0.25Si1.83O6	48.967	0.315198	5.61585	3.19173	0	16.7265	0	17.9795	0	0	6.95697	0.247281	0	0	0	0	0	0	0
clinopyroxene_1	9.46707	cpx	Na0.04Ca0.67Fe''0.32Mg0.74Fe'''0.12Ti0.02Al0.31Si1.78O6	47.4598	0.772774	6.91723	4.298	0	10.2484	0	13.2043	0	0	16.5773	0.522128	0	0	0	0	0	0	0
feldspar_0	16.7745	K0.01Na0.40Ca0.59Al1.59Si2.41O8	53.3316	0	29.7761	0	0	0	0	0	0	0	12.1214	4.57338	0.197581	0	0	0	0	0	0
Temperature	1140	P	6250
clinopyroxene_0	22.0936	cpx	Na0.02Ca0.27Fe''0.54Mg0.99Fe'''0.09Ti0.01Al0.25Si1.83O6	48.8191	0.333638	5.58226	3.22962	0	17.3592	0	17.696	0	0	6.73313	0.247094	0	0	0	0	0	0	0
clinopyroxene_1	9.90841	cpx	Na0.04Ca0.68Fe''0.33Mg0.72Fe'''0.13Ti0.03Al0.31Si1.78O6	47.1916	0.883827	6.97804	4.43775	0	10.3762	0	12.8008	0	0	16.7879	0.543872	0	0	0	0	0	0	0
feldspar_0	19.1307	K0.01Na0.41Ca0.58Al1.58Si2.42O8	53.6427	0	29.5629	0	0	0	0	0	0	0	11.8729	4.70779	0.213734	0	0	0	0	0	0
Temperature	1130	P	6250
clinopyroxene_0	23.2051	cpx	Na0.02Ca0.26Fe''0.56Mg0.98Fe'''0.09Ti0.01Al0.25Si1.83O6	48.6882	0.3508	5.54496	3.25339	0	17.9683	0	17.4387	0	0	6.50963	0.245961	0	0	0	0	0	0	0
clinopyroxene_1	10.3714	cpx	Na0.04Ca0.69Fe''0.33Mg0.70Fe'''0.13Ti0.03Al0.31Si1.77O6	46.9213	1.00896	7.04372	4.56636	0	10.4702	0	12.4188	0	0	17.0058	0.564811	0	0	0	0	0	0	0
feldspar_0	21.2312	K0.01Na0.42Ca0.56Al1.56Si2.44O8	53.9313	0	29.3649	0	0	0	0	0	0	0	11.6422	4.83182	0.229745	0	0	0	0	0	0
Temperature	1120	P	6250
clinopyroxene_0	24.1619	cpx	Na0.02Ca0.25Fe''0.58Mg0.97Fe'''0.09Ti0.01Al0.24Si1.83O6	48.5756	0.366269	5.50367	3.26269	0	18.5508	0	17.208	0	0	6.28896	0.243982	0	0	0	0	0	0	0
clinopyroxene_1	10.8376	cpx	Na0.04Ca0.70Fe''0.33Mg0.68Fe'''0.13Ti0.03Al0.32Si1.76O6	46.6482	1.14935	7.11474	4.68241	0	10.5314	0	12.059	0	0	17.2302	0.584744	0	0	0	0	0	0	0
feldspar_0	23.1099	K0.01Na0.43Ca0.55Al1.55Si2.45O8	54.1979	0	29.1818	0	0	0	0	0	0	0	11.4289	4.94587	0.245529	0	0	0	0	0	0
Temperature	1110	P	6250
clinopyroxene_0	23.6392	cpx	Na0.02Ca0.25Fe''0.59Mg0.98Fe'''0.09Ti0.01Al0.23Si1.84O6	48.8949	0.344563	5.24585	3.01902	0	18.6003	0	17.4891	0	0	6.17002	0.23623	0	0	0	0	0	0	0
clinopyroxene_1	11.4455	cpx	Na0.04Ca0.70Fe''0.33Mg0.69Fe'''0.12Ti0.03Al0.31Si1.77O6	46.9931	1.12101	6.87	4.39615	0	10.4211	0	12.2415	0	0	17.3755	0.58166	0	0	0	0	0	0	0
feldspar_0	25.3563	K0.01Na0.44Ca0.54Al1.54Si2.46O8	54.4674	0	28.9973	0	0	0	0	0	0	0	11.2138	5.06268	0.258841	0	0	0	0	0	0
spinel_0	1.09754	Fe''1.04Mg0.20Fe'''1.24Al0.28Cr0.00Ti0.24O4	0	8.88409	6.71418	45.9363	0	34.7468	0	3.71861	0	0	0	0	0	0	0	0	0	0	0
Temperature	1100	P	6250
clinopyroxene_0	23.8473	cpx	Na0.02Ca0.24Fe''0.60Mg0.98Fe'''0.08Ti0.01Al0.23Si1.84O6	48.971	0.341657	5.12392	2.91744	0	18.9176	0	17.4925	0	0	6.00475	0.231234	0	0	0	0	0	0	0
clinopyroxene_1	11.8615	cpx	Na0.04Ca0.71Fe''0.33Mg0.68Fe'''0.12Ti0.03Al0.30Si1.77O6	46.9918	1.18567	6.8168	4.32856	0	10.3914	0	12.1379	0	0	17.5583	0.589623	0	0	0	0	0	0	0
feldspar_0	27.0474	K0.02Na0.45Ca0.53Al1.53Si2.47O8	54.6821	0	28.8495	0	0	0	0	0	0	0	11.0418	5.15392	0.272595	0	0	0	0	0	0
spinel_0	1.44293	Fe''1.06Mg0.19Fe'''1.23Al0.27Cr0.00Ti0.25O4	0	9.19404	6.38574	45.6649	0	35.1467	0	3.60862	0	0	0	0	0	0	0	0	0	0	0
Temperature	1090	P	6250
clinopyroxene_0	24.0236	cpx	Na0.02Ca0.24Fe''0.61Mg0.98Fe'''0.08Ti0.01Al0.22Si1.85O6	49.0423	0.338087	5.01138	2.81869	0	19.2237	0	17.4952	0	0	5.84457	0.226114	0	0	0	0	0	0	0
clinopyroxene_1	12.2259	cpx	Na0.04Ca0.72Fe''0.33Mg0.68Fe'''0.12Ti0.04Al0.30Si1.77O6	46.983	1.25266	6.77498	4.26158	0	10.3546	0	12.0381	0	0	17.7382	0.596907	0	0	0	0	0	0	0
feldspar_0	28.5506	K0.02Na0.46Ca0.53Al1.53Si2.47O8	54.8705	0	28.7197	0	0	0	0	0	0	0	10.8908	5.23326	0.285792	0	0	0	0	0	0
spinel_0	1.71836	Fe''1.07Mg0.19Fe'''1.23Al0.26Cr0.00Ti0.26O4	0	9.47558	6.09659	45.4062	0	35.5152	0	3.5064	0	0	0	0	0	0	0	0	0	0	0
Temperature	1080	P	6250
clinopyroxene_0	24.1774	cpx	Na0.02Ca0.23Fe''0.62Mg0.98Fe'''0.08Ti0.01Al0.22Si1.85O6	49.1091	0.333969	4.90707	2.72284	0	19.5202	0	17.4968	0	0	5.68912	0.220936	0	0	0	0	0	0	0
clinopyroxene_1	12.5479	cpx	Na0.04Ca0.73Fe''0.33Mg0.67Fe'''0.12Ti0.04Al0.30Si1.77O6	46.9661	1.3226	6.74378	4.19559	0	10.3117	0	11.9413	0	0	17.9153	0.603656	0	0	0	0	0	0	0
feldspar_0	29.8915	K0.02Na0.46Ca0.52Al1.52Si2.48O8	55.0366	0	28.605	0	0	0	0	0	0	0	10.7574	5.30263	0.298462	0	0	0	0	0	0
spinel_0	1.93772	Fe''1.08Mg0.18Fe'''1.22Al0.25Cr0.00Ti0.26O4	0	9.73181	5.83923	45.1625	0	35.8561	0	3.41037	0	0	0	0	0	0	0	0	0	0	0
Temperature	1070	P	6250
clinopyroxene_0	24.316	cpx	Na0.02Ca0.22Fe''0.62Mg0.98Fe'''0.07Ti0.01Al0.21Si1.85O6	49.1715	0.329382	4.81	2.6299	0	19.8089	0	17.4965	0	0	5.5381	0.215752	0	0	0	0	0	0	0
clinopyroxene_1	12.8344	cpx	Na0.04Ca0.73Fe''0.32Mg0.67Fe'''0.12Ti0.04Al0.30Si1.77O6	46.9406	1.39613	6.72265	4.13094	0	10.2633	0	11.8464	0	0	18.09	0.609986	0	0	0	0	0	0	0
feldspar_0	31.092	K0.02Na0.47Ca0.51Al1.51Si2.49O8	55.1839	0	28.503	0	0	0	0	0	0	0	10.6388	5.36362	0.310641	0	0	0	0	0	0
spinel_0	2.11149	Fe''1.09Mg0.18Fe'''1.22Al0.24Cr0.00Ti0.27O4	0	9.96499	5.60801	44.9351	0	36.1726	0	3.3193	0	0	0	0	0	0	0	0	0	0	0
Temperature	1060	P	6250
clinopyroxene_0	24.4453	cpx	Na0.02Ca0.22Fe''0.63Mg0.98Fe'''0.07Ti0.01Al0.21Si1.86O6	49.2299	0.324378	4.71932	2.53989	0	20.0909	0	17.4938	0	0	5.39124	0.210599	0	0	0	0	0	0	0
clinopyroxene_1	13.0907	cpx	Na0.05Ca0.74Fe''0.32Mg0.66Fe'''0.12Ti0.04Al0.30Si1.77O6	46.9058	1.47391	6.71127	4.06792	0	10.2101	0	11.7526	0	0	18.2624	0.615994	0	0	0	0	0	0	0
feldspar_0	32.1705	K0.02Na0.47Ca0.51Al1.51Si2.49O8	55.3154	0	28.4118	0	0	0	0	0	0	0	10.5329	5.41752	0.322371	0	0	0	0	0	0
spinel_0	2.24758	Fe''1.10Mg0.17Fe'''1.22Al0.23Cr0.00Ti0.28O4	0	10.1767	5.39863	44.7256	0	36.4668	0	3.23222	0	0	0	0	0	0	0	0	0	0	0
Temperature	1050	P	6250
clinopyroxene_0	24.57	cpx	Na0.02Ca0.21Fe''0.64Mg0.98Fe'''0.07Ti0.01Al0.21Si1.86O6	49.2842	0.318994	4.63435	2.45279	0	20.3675	0	17.4883	0	0	5.24831	0.205506	0	0	0	0	0	0	0
clinopyroxene_1	13.3209	cpx	Na0.05Ca0.75Fe''0.32Mg0.66Fe'''0.11Ti0.04Al0.30Si1.77O6	46.8609	1.55669	6.70947	4.00681	0	10.1525	0	11.659	0	0	18.4329	0.621764	0	0	0	0	0	0	0
feldspar_0	33.1426	K0.02Na0.48Ca0.50Al1.50Si2.50O8	55.4334	0	28.3298	0	0	0	0	0	0	0	10.4378	5.46541	0.333693	0	0	0	0	0	0
spinel_0	2.35198	Fe''1.11Mg0.17Fe'''1.21Al0.22Cr0.00Ti0.28O4	0	10.368	5.20774	44.5355	0	36.7404	0	3.14834	0	0	0	0	0	0	0	0	0	0	0
Temperature	1040	P	6250
clinopyroxene_0	24.6941	cpx	Na0.01Ca0.21Fe''0.65Mg0.98Fe'''0.07Ti0.01Al0.20Si1.86O6	49.3346	0.313248	4.5545	2.36859	0	20.64	0	17.4795	0	0	5.10912	0.200494	0	0	0	0	0	0	0
clinopyroxene_1	13.5283	cpx	Na0.05Ca0.75Fe''0.32Mg0.65Fe'''0.11Ti0.05Al0.30Si1.77O6	46.8048	1.64529	6.71734	3.9479	0	10.0908	0	11.5649	0	0	18.6016	0.627361	0	0	0	0	0	0	0
feldspar_0	34.0216	K0.02Na0.48Ca0.50Al1.50Si2.50O8	55.5397	0	28.2557	0	0	0	0	0	0	0	10.3518	5.50816	0.344655	0	0	0	0	0	0
spinel_0	2.42918	Fe''1.12Mg0.17Fe'''1.21Al0.22Cr0.00Ti0.29O4	0	10.5395	5.03272	44.3665	0	36.9944	0	3.06698	0	0	0	0	0	0	0	0	0	0	0
Temperature	1030	P	6250
clinopyroxene_0	24.8213	cpx	Na0.01Ca0.20Fe''0.66Mg0.98Fe'''0.07Ti0.01Al0.20Si1.87O6	49.3811	0.307148	4.47927	2.28726	0	20.9093	0	17.4668	0	0	4.97351	0.19558	0	0	0	0	0	0	0
clinopyroxene_1	13.7155	cpx	Na0.05Ca0.76Fe''0.32Mg0.65Fe'''0.11Ti0.05Al0.30Si1.77O6	46.7363	1.74068	6.73511	3.89149	0	10.0255	0	11.4692	0	0	18.7689	0.632845	0	0	0	0	0	0	0
feldspar_0	34.8184	K0.02Na0.48Ca0.50Al1.50Si2.50O8	55.6362	0	28.1883	0	0	0	0	0	0	0	10.2737	5.54652	0.355303	0	0	0	0	0	0
spinel_0	2.48252	Fe''1.13Mg0.16Fe'''1.21Al0.21Cr0.00Ti0.29O4	0	10.6911	4.87151	44.2204	0	37.2294	0	2.98756	0	0	0	0	0	0	0	0	0	0	0
Temperature	1020	P	6250
clinopyroxene_0	24.9549	cpx	Na0.01Ca0.20Fe''0.67Mg0.98Fe'''0.06Ti0.01Al0.20Si1.87O6	49.4238	0.300688	4.40826	2.2088	0	21.1767	0	17.4496	0	0	4.84135	0.190777	0	0	0	0	0	0	0
clinopyroxene_1	13.8847	cpx	Na0.05Ca0.77Fe''0.32Mg0.64Fe'''0.11Ti0.05Al0.30Si1.77O6	46.6538	1.84398	6.76329	3.8379	0	9.95665	0	11.3709	0	0	18.9352	0.638262	0	0	0	0	0	0	0
feldspar_0	35.5423	K0.02Na0.49Ca0.49Al1.49Si2.51O8	55.7242	0	28.1267	0	0	0	0	0	0	0	10.2023	5.58111	0.365688	0	0	0	0	0	0
spinel_0	2.51438	Fe''1.14Mg0.16Fe'''1.21Al0.20Cr0.00Ti0.30O4	0	10.8226	4.72249	44.0999	0	37.4455	0	2.90958	0	0	0	0	0	0	0	0	0	0	0
Temperature	1010	P	6250
clinopyroxene_0	25.0981	cpx	Na0.01Ca0.19Fe''0.68Mg0.98Fe'''0.06Ti0.01Al0.19Si1.87O6	49.4627	0.293846	4.34095	2.13317	0	21.4432	0	17.4275	0	0	4.7126	0.186073	0	0	0	0	0	0	0
clinopyroxene_1	14.0373	cpx	Na0.05Ca0.77Fe''0.31Mg0.64Fe'''0.11Ti0.06Al0.30Si1.76O6	46.5554	1.9565	6.80236	3.7874	0	9.88462	0	11.2693	0	0	19.1008	0.643584	0	0	0	0	0	0	0
feldspar_0	36.2026	K0.02Na0.49Ca0.49Al1.49Si2.51O8	55.8053	0	28.0697	0	0	0	0	0	0	0	10.1364	5.61262	0.37587	0	0	0	0	0	0
spinel_0	2.52647	Fe''1.15Mg0.15Fe'''1.21Al0.20Cr0.00Ti0.30O4	0	10.933	4.58424	44.0077	0	37.6425	0	2.83256	0	0	0	0	0	0	0	0	0	0	0
Temperature	1000	P	6250
clinopyroxene_0	25.2545	cpx	Na0.01Ca0.19Fe''0.69Mg0.98Fe'''0.06Ti0.01Al0.19Si1.87O6	49.4975	0.286599	4.27725	2.06043	0	21.71	0	17.3995	0	0	4.58719	0.181503	0	0	0	0	0	0	0
clinopyroxene_1	14.1751	cpx	Na0.05Ca0.78Fe''0.31Mg0.63Fe'''0.11Ti0.06Al0.31Si1.76O6	46.4388	2.07986	6.85359	3.74052	0	9.80954	0	11.1627	0	0	19.2661	0.64892	0	0	0	0	0	0	0
feldspar_0	36.804	K0.02Na0.49Ca0.49Al1.49Si2.51O8	55.8801	0	28.0171	0	0	0	0	0	0	0	10.0756	5.6413	0.385892	0	0	0	0	0	0
spinel_0	2.51953	Fe''1.15Mg0.15Fe'''1.20Al0.19Cr0.00Ti0.30O4	0	11.0207	4.45597	43.9478	0	37.8194	0	2.75604	0	0	0	0	0	0	0	0	0	0	0
Temperature	990	P	6250
clinopyroxene_0	25.4278	cpx	Na0.01Ca0.18Fe''0.70Mg0.98Fe'''0.06Ti0.01Al0.19Si1.88O6	49.5281	0.278901	4.21683	1.99061	0	21.9785	0	17.3648	0	0	4.46517	0.177067	0	0	0	0	0	0	0
clinopyroxene_1	14.299	cpx	Na0.05Ca0.79Fe''0.31Mg0.62Fe'''0.11Ti0.06Al0.31Si1.75O6	46.3009	2.21597	6.91821	3.69769	0	9.73161	0	11.0498	0	0	19.4315	0.654261	0	0	0	0	0	0	0
feldspar_0	37.3528	K0.02Na0.49Ca0.48Al1.48Si2.52O8	55.9496	0	27.9681	0	0	0	0	0	0	0	10.0189	5.66761	0.395821	0	0	0	0	0	0
spinel_0	2.49386	Fe''1.16Mg0.15Fe'''1.21Al0.19Cr0.00Ti0.30O4	0	11.0837	4.33689	43.9251	0	37.9748	0	2.67959	0	0	0	0	0	0	0	0	0	0	0
Temperature	980	P	6250
clinopyroxene_0	25.6225	cpx	Na0.01Ca0.18Fe''0.71Mg0.98Fe'''0.05Ti0.01Al0.19Si1.88O6	49.5543	0.270695	4.1595	1.92377	0	22.25	0	17.3223	0	0	4.34666	0.172774	0	0	0	0	0	0	0
clinopyroxene_1	14.4096	cpx	Na0.05Ca0.80Fe''0.31Mg0.62Fe'''0.10Ti0.07Al0.31Si1.75O6	46.1383	2.36713	6.99792	3.65947	0	9.65106	0	10.9291	0	0	19.5974	0.659612	0	0	0	0	0	0	0
feldspar_0	37.8535	K0.02Na0.50Ca0.48Al1.48Si2.52O8	56.0147	0	27.922	0	0	0	0	0	0	0	9.96565	5.69189	0.405727	0	0	0	0	0	0
spinel_0	2.44907	Fe''1.16Mg0.14Fe'''1.21Al0.18Cr0.00Ti0.31O4	0	11.1188	4.2265	43.9457	0	38.1063	0	2.60273	0	0	0	0	0	0	0	0	0	0	0
Temperature	970	P	6250
clinopyroxene_0	25.8436	cpx	Na0.01Ca0.17Fe''0.71Mg0.98Fe'''0.05Ti0.01Al0.18Si1.88O6	49.5758	0.261906	4.10507	1.85998	0	22.5261	0	17.2706	0	0	4.23189	0.168634	0	0	0	0	0	0	0
clinopyroxene_1	14.5072	cpx	Na0.05Ca0.80Fe''0.30Mg0.61Fe'''0.10Ti0.07Al0.32Si1.74O6	45.9468	2.53608	7.09484	3.62647	0	9.56819	0	10.7984	0	0	19.7643	0.664963	0	0	0	0	0	0	0
feldspar_0	38.3102	K0.02Na0.50Ca0.48Al1.48Si2.52O8	56.0762	0	27.8784	0	0	0	0	0	0	0	9.91531	5.71445	0.41569	0	0	0	0	0	0
spinel_0	2.38413	Fe''1.17Mg0.14Fe'''1.21Al0.18Cr0.00Ti0.31O4	0	11.122	4.12454	44.0174	0	38.2111	0	2.525	0	0	0	0	0	0	0	0	0	0	0
Temperature	960	P	6250
clinopyroxene_0	26.3039	cpx	Na0.01Ca0.17Fe''0.73Mg0.97Fe'''0.05Ti0.01Al0.18Si1.88O6	49.572	0.245853	4.05255	1.81134	0	22.8702	0	17.1379	0	0	4.14479	0.165433	0	0	0	0	0	0	0
clinopyroxene_1	13.9168	cpx	Na0.05Ca0.81Fe''0.31Mg0.61Fe'''0.10Ti0.07Al0.31Si1.75O6	46.0267	2.49742	7.0424	3.56521	0	9.63691	0	10.7442	0	0	19.8179	0.66927	0	0	0	0	0	0	0
clinopyroxene_2	0.666119	cpx	Na0.04Ca0.91Fe''0.23Mg0.40Fe'''0.12Ti0.33Al0.66Si1.30O6	33.6449	11.2212	14.5116	3.9434	0	7.21752	0	7.00607	0	0	21.9052	0.550163	0	0	0	0	0	0	0
feldspar_0	38.6826	K0.02Na0.50Ca0.47Al1.47Si2.53O8	56.1473	0	27.8277	0	0	0	0	0	0	0	9.85692	5.73996	0.428179	0	0	0	0	0	0
spinel_0	2.1971	Fe''1.17Mg0.13Fe'''1.23Al0.17Cr0.00Ti0.30O4	0	10.8648	4.05329	44.54	0	38.1233	0	2.4186	0	0	0	0	0	0	0	0	0	0	0
Temperature	950	P	6250
clinopyroxene_0	26.8075	cpx	Na0.01Ca0.17Fe''0.74Mg0.96Fe'''0.05Ti0.01Al0.18Si1.88O6	49.5603	0.228737	4.00252	1.76682	0	23.2291	0	16.9852	0	0	4.06477	0.162494	0	0	0	0	0	0	0
clinopyroxene_1	13.2228	cpx	Na0.05Ca0.81Fe''0.31Mg0.61Fe'''0.10Ti0.07Al0.31Si1.75O6	46.1851	2.39936	6.94876	3.49489	0	9.74376	0	10.7142	0	0	19.8407	0.673317	0	0	0	0	0	0	0
clinopyroxene_2	1.43531	cpx	Na0.04Ca0.91Fe''0.24Mg0.40Fe'''0.11Ti0.33Al0.67Si1.30O6	33.4424	11.3743	14.6678	3.85846	0	7.26441	0	6.89228	0	0	21.9521	0.548311	0	0	0	0	0	0	0
feldspar_0	39.0152	K0.03Na0.50Ca0.47Al1.47Si2.53O8	56.2177	0	27.7773	0	0	0	0	0	0	0	9.79888	5.76478	0.441361	0	0	0	0	0	0
spinel_0	1.97839	Fe''1.16Mg0.13Fe'''1.25Al0.17Cr0.00Ti0.29O4	0	10.5343	3.99414	45.1889	0	37.9729	0	2.3098	0	0	0	0	0	0	0	0	0	0	0
Temperature	940	P	6250
clinopyroxene_0	27.2906	cpx	Na0.01Ca0.16Fe''0.75Mg0.96Fe'''0.05Ti0.01Al0.18Si1.89O6	49.5472	0.212587	3.95504	1.72265	0	23.5838	0	16.8345	0	0	3.98469	0.159582	0	0	0	0	0	0	0
clinopyroxene_1	12.6191	cpx	Na0.05Ca0.81Fe''0.31Mg0.60Fe'''0.10Ti0.07Al0.31Si1.76O6	46.3389	2.30472	6.86007	3.42453	0	9.84441	0	10.685	0	0	19.8651	0.677408	0	0	0	0	0	0	0
clinopyroxene_2	2.11757	cpx	Na0.04Ca0.91Fe''0.24Mg0.39Fe'''0.11Ti0.34Al0.68Si1.29O6	33.2445	11.524	14.824	3.77184	0	7.30925	0	6.78257	0	0	21.9975	0.546272	0	0	0	0	0	0	0
feldspar_0	39.3248	K0.03Na0.50Ca0.47Al1.47Si2.53O8	56.284	0	27.7297	0	0	0	0	0	0	0	9.74417	5.78765	0.45455	0	0	0	0	0	0
spinel_0	1.75983	Fe''1.16Mg0.12Fe'''1.27Al0.17Cr0.00Ti0.28O4	0	10.1986	3.93996	45.8449	0	37.8096	0	2.20693	0	0	0	0	0	0	0	0	0	0	0
Temperature	930	P	6250
clinopyroxene_0	27.7539	cpx	Na0.01Ca0.16Fe''0.76Mg0.95Fe'''0.05Ti0.01Al0.18Si1.89O6	49.5329	0.197363	3.90994	1.67881	0	23.934	0	16.6857	0	0	3.90463	0.156698	0	0	0	0	0	0	0
clinopyroxene_1	12.0953	cpx	Na0.05Ca0.81Fe''0.32Mg0.60Fe'''0.10Ti0.06Al0.30Si1.76O6	46.4884	2.2133	6.77606	3.35406	0	9.93872	0	10.6568	0	0	19.891	0.681549	0	0	0	0	0	0	0
clinopyroxene_2	2.72264	cpx	Na0.04Ca0.92Fe''0.24Mg0.39Fe'''0.11Ti0.34Al0.69Si1.28O6	33.0512	11.6705	14.9801	3.68371	0	7.35199	0	6.67687	0	0	22.0416	0.544042	0	0	0	0	0	0	0
feldspar_0	39.6141	K0.03Na0.51Ca0.47Al1.47Si2.53O8	56.3461	0	27.6848	0	0	0	0	0	0	0	9.69265	5.80863	0.467758	0	0	0	0	0	0
spinel_0	1.54221	Fe''1.16Mg0.12Fe'''1.29Al0.17Cr0.00Ti0.27O4	0	9.85896	3.89033	46.5063	0	37.6347	0	2.10968	0	0	0	0	0	0	0	0	0	0	0
Temperature	920	P	6250
clinopyroxene_0	28.1986	cpx	Na0.01Ca0.16Fe''0.77Mg0.94Fe'''0.05Ti0.01Al0.17Si1.89O6	49.5174	0.183024	3.86708	1.63525	0	24.2795	0	16.5392	0	0	3.82465	0.153841	0	0	0	0	0	0	0
clinopyroxene_1	11.6425	cpx	Na0.05Ca0.81Fe''0.32Mg0.60Fe'''0.09Ti0.06Al0.30Si1.77O6	46.6342	2.12494	6.69648	3.28347	0	10.0265	0	10.63	0	0	19.9186	0.685748	0	0	0	0	0	0	0
clinopyroxene_2	3.25885	cpx	Na0.04Ca0.92Fe''0.24Mg0.38Fe'''0.11Ti0.35Al0.69Si1.28O6	32.8621	11.8139	15.136	3.59424	0	7.39261	0	6.57507	0	0	22.0845	0.541619	0	0	0	0	0	0	0
feldspar_0	39.8856	K0.03Na0.51Ca0.46Al1.46Si2.54O8	56.4045	0	27.6426	0	0	0	0	0	0	0	9.64419	5.82779	0.480998	0	0	0	0	0	0
spinel_0	1.32623	Fe''1.15Mg0.11Fe'''1.31Al0.17Cr0.00Ti0.26O4	0	9.51645	3.84489	47.1712	0	37.4498	0	2.01772	0	0	0	0	0	0	0	0	0	0	0
Temperature	910	P	6250
clinopyroxene_0	28.6254	cpx	Na0.01Ca0.15Fe''0.79Mg0.93Fe'''0.05Ti0.00Al0.17Si1.89O6	49.5011	0.169533	3.8263	1.59196	0	24.6201	0	16.3951	0	0	3.74484	0.151012	0	0	0	0	0	0	0
clinopyroxene_1	11.2528	cpx	Na0.05Ca0.81Fe''0.32Mg0.60Fe'''0.09Ti0.06Al0.30Si1.77O6	46.7764	2.0395	6.6211	3.21271	0	10.1077	0	10.6048	0	0	19.9477	0.69001	0	0	0	0	0	0	0
clinopyroxene_2	3.73339	cpx	Na0.04Ca0.92Fe''0.24Mg0.38Fe'''0.10Ti0.35Al0.70Si1.27O6	32.6771	11.9544	15.2914	3.5036	0	7.43107	0	6.4771	0	0	22.1263	0.539003	0	0	0	0	0	0	0
feldspar_0	40.1413	K0.03Na0.51Ca0.46Al1.46Si2.54O8	56.459	0	27.6028	0	0	0	0	0	0	0	9.59868	5.8452	0.494284	0	0	0	0	0	0
spinel_0	1.11247	Fe''1.15Mg0.11Fe'''1.33Al0.17Cr0.00Ti0.25O4	0	9.17215	3.80325	47.8377	0	37.2561	0	1.93076	0	0	0	0	0	0	0	0	0	0	0
Temperature	900	P	6250
garnet_0	0.521778	(Ca0.16Fe''0.52Mg0.32)3Al2Si3O12	39.2074	0	22.1779	0	0	24.2454	0	8.43169	0	0	5.93758	0	0	0	0	0	0	0	0
clinopyroxene_0	28.666	cpx	Na0.01Ca0.15Fe''0.80Mg0.93Fe'''0.04Ti0.00Al0.17Si1.89O6	49.4931	0.156991	3.77032	1.54637	0	24.9686	0	16.2523	0	0	3.66368	0.148686	0	0	0	0	0	0	0
clinopyroxene_1	11.0779	cpx	Na0.05Ca0.81Fe''0.32Mg0.60Fe'''0.09Ti0.06Al0.29Si1.78O6	46.9213	1.9628	6.53365	3.1418	0	10.1885	0	10.5795	0	0	19.9754	0.697161	0	0	0	0	0	0	0
clinopyroxene_2	4.16943	cpx	Na0.04Ca0.92Fe''0.24Mg0.37Fe'''0.10Ti0.35Al0.71Si1.26O6	32.5143	12.0867	15.4262	3.41461	0	7.47533	0	6.38341	0	0	22.1596	0.539936	0	0	0	0	0	0	0
feldspar_0	40.0923	K0.03Na0.51Ca0.46Al1.46Si2.54O8	56.5853	0	27.514	0	0	0	0	0	0	0	9.49591	5.89378	0.511003	0	0	0	0	0	0
spinel_0	0.831895	Fe''1.14Mg0.10Fe'''1.34Al0.16Cr0.00Ti0.25O4	0	8.87377	3.74013	48.4425	0	37.0966	0	1.84691	0	0	0	0	0	0	0	0	0	0	0
Temperature	890	P	6250
garnet_0	4.32257	(Ca0.16Fe''0.52Mg0.31)3Al2Si3O12	39.1485	0	22.1446	0	0	24.5616	0	8.23269	0	0	5.91266	0	0	0	0	0	0	0	0
clinopyroxene_0	26.4075	cpx	Na0.01Ca0.15Fe''0.81Mg0.92Fe'''0.04Ti0.00Al0.16Si1.90O6	49.5473	0.14616	3.60075	1.48358	0	25.3903	0	16.1102	0	0	3.57231	0.149501	0	0	0	0	0	0	0
clinopyroxene_1	11.9011	cpx	Na0.05Ca0.81Fe''0.33Mg0.60Fe'''0.09Ti0.06Al0.28Si1.79O6	47.1041	1.92895	6.34151	3.07039	0	10.3	0	10.5472	0	0	19.9842	0.723678	0	0	0	0	0	0	0
clinopyroxene_2	4.68377	cpx	Na0.04Ca0.92Fe''0.25Mg0.37Fe'''0.10Ti0.36Al0.71Si1.26O6	32.4785	12.1801	15.4257	3.34203	0	7.56748	0	6.29864	0	0	22.1407	0.566777	0	0	0	0	0	0	0
feldspar_0	38.211	K0.03Na0.54Ca0.43Al1.43Si2.57O8	57.2089	0	27.0847	0	0	0	0	0	0	0	8.99625	6.15803	0.552086	0	0	0	0	0	0
spinel_0	0.109113	Fe''1.15Mg0.10Fe'''1.35Al0.15Cr0.00Ti0.25O4	0	8.88707	3.5191	48.6291	0	37.2061	0	1.75866	0	0	0	0	0	0	0	0	0	0	0
Temperature	880	P	6250
garnet_0	6.81022	(Ca0.16Fe''0.53Mg0.31)3Al2Si3O12	39.1281	0	22.1331	0	0	24.6891	0	8.17446	0	0	5.87519	0	0	0	0	0	0	0	0
clinopyroxene_0	24.2672	cpx	Na0.01Ca0.14Fe''0.82Mg0.93Fe'''0.04Ti0.00Al0.15Si1.90O6	49.73	0.136488	3.41458	1.36961	0	25.4557	0	16.2554	0	0	3.49099	0.147276	0	0	0	0	0	0	0
clinopyroxene_1	12.7715	cpx	Na0.05Ca0.81Fe''0.32Mg0.60Fe'''0.08Ti0.05Al0.27Si1.80O6	47.4225	1.86933	6.11805	2.88702	0	10.2189	0	10.7092	0	0	20.0413	0.733653	0	0	0	0	0	0	0
clinopyroxene_2	4.71022	cpx	Na0.04Ca0.92Fe''0.24Mg0.36Fe'''0.09Ti0.36Al0.71Si1.26O6	32.3927	12.3462	15.5301	3.17407	0	7.51413	0	6.29863	0	0	22.1616	0.582593	0	0	0	0	0	0	0
feldspar_0	37.1748	K0.03Na0.55Ca0.42Al1.42Si2.58O8	57.6277	0	26.7971	0	0	0	0	0	0	0	8.66125	6.3373	0.576628	0	0	0	0	0	0
Temperature	870	P	6250
garnet_0	8.9545	(Ca0.16Fe''0.53Mg0.31)3Al2Si3O12	39.1155	0	22.126	0	0	24.7803	0	8.14511	0	0	5.83309	0	0	0	0	0	0	0	0
clinopyroxene_0	22.2564	cpx	Na0.01Ca0.14Fe''0.81Mg0.94Fe'''0.04Ti0.00Al0.15Si1.91O6	49.9293	0.127481	3.23329	1.25438	0	25.4447	0	16.455	0	0	3.4113	0.144579	0	0	0	0	0	0	0
clinopyroxene_1	13.5977	cpx	Na0.05Ca0.81Fe''0.32Mg0.61Fe'''0.08Ti0.05Al0.26Si1.81O6	47.7529	1.80867	5.89775	2.6945	0	10.0916	0	10.9043	0	0	20.1096	0.740684	0	0	0	0	0	0	0
clinopyroxene_2	4.66075	cpx	Na0.04Ca0.92Fe''0.24Mg0.37Fe'''0.09Ti0.37Al0.72Si1.25O6	32.3014	12.519	15.6521	2.99648	0	7.43206	0	6.3151	0	0	22.1869	0.596952	0	0	0	0	0	0	0
feldspar_0	36.3273	K0.03Na0.56Ca0.40Al1.40Si2.60O8	58.0036	0	26.5391	0	0	0	0	0	0	0	8.36067	6.49848	0.598177	0	0	0	0	0	0
Temperature	860	P	6250
garnet_0	10.9498	(Ca0.16Fe''0.53Mg0.31)3Al2Si3O12	39.1037	0	22.1193	0	0	24.8693	0	8.11938	0	0	5.78837	0	0	0	0	0	0	0	0
clinopyroxene_0	20.3933	cpx	Na0.01Ca0.14Fe''0.81Mg0.95Fe'''0.03Ti0.00Al0.14Si1.92O6	50.1209	0.119012	3.06085	1.1477	0	25.4217	0	16.6564	0	0	3.33153	0.14195	0	0	0	0	0	0	0
clinopyroxene_1	14.3541	cpx	Na0.05Ca0.82Fe''0.31Mg0.62Fe'''0.07Ti0.05Al0.25Si1.82O6	48.0693	1.75193	5.68745	2.51411	0	9.95278	0	11.0964	0	0	20.1801	0.747868	0	0	0	0	0	0	0
clinopyroxene_2	4.62237	cpx	Na0.05Ca0.92Fe''0.24Mg0.37Fe'''0.08Ti0.37Al0.72Si1.25O6	32.2147	12.6847	15.7719	2.82725	0	7.34771	0	6.33276	0	0	22.2089	0.612018	0	0	0	0	0	0	0
feldspar_0	35.5398	K0.04Na0.58Ca0.39Al1.39Si2.61O8	58.3707	0	26.2869	0	0	0	0	0	0	0	8.06697	6.65537	0.620082	0	0	0	0	0	0
Temperature	850	P	6250
garnet_0	12.8091	(Ca0.16Fe''0.53Mg0.31)3Al2Si3O12	39.0925	0	22.1129	0	0	24.9565	0	8.09686	0	0	5.74119	0	0	0	0	0	0	0	0
clinopyroxene_0	18.6643	cpx	Na0.01Ca0.13Fe''0.81Mg0.96Fe'''0.03Ti0.00Al0.13Si1.92O6	50.3053	0.11105	2.89677	1.04901	0	25.3874	0	16.8592	0	0	3.2518	0.13938	0	0	0	0	0	0	0
clinopyroxene_1	15.0487	cpx	Na0.06Ca0.82Fe''0.31Mg0.63Fe'''0.07Ti0.05Al0.24Si1.82O6	48.3725	1.69879	5.48665	2.34519	0	9.80371	0	11.2855	0	0	20.2525	0.755189	0	0	0	0	0	0	0
clinopyroxene_2	4.59283	cpx	Na0.05Ca0.92Fe''0.24Mg0.37Fe'''0.08Ti0.37Al0.73Si1.25O6	32.1324	12.8437	15.8892	2.66599	0	7.26142	0	6.35151	0	0	22.228	0.627765	0	0	0	0	0	0	0
feldspar_0	34.8077	K0.04Na0.59Ca0.37Al1.37Si2.63O8	58.7288	0	26.0407	0	0	0	0	0	0	0	7.78028	6.80792	0.642327	0	0	0	0	0	0
Temperature	840	P	6250
garnet_0	14.5443	(Ca0.16Fe''0.54Mg0.31)3Al2Si3O12	39.0819	0	22.1069	0	0	25.0423	0	8.0772	0	0	5.69167	0	0	0	0	0	0	0	0
clinopyroxene_0	17.0568	cpx	Na0.01Ca0.13Fe''0.81Mg0.97Fe'''0.03Ti0.00Al0.12Si1.93O6	50.4829	0.103569	2.74062	0.957791	0	25.3426	0	17.0634	0	0	3.17223	0.136862	0	0	0	0	0	0	0
clinopyroxene_1	15.6884	cpx	Na0.06Ca0.82Fe''0.30Mg0.64Fe'''0.06Ti0.05Al0.24Si1.83O6	48.663	1.64896	5.29484	2.18708	0	9.64548	0	11.4715	0	0	20.3265	0.762632	0	0	0	0	0	0	0
clinopyroxene_2	4.57035	cpx	Na0.05Ca0.92Fe''0.23Mg0.37Fe'''0.07Ti0.38Al0.73Si1.24O6	32.0543	12.9965	16.0039	2.51235	0	7.17344	0	6.37127	0	0	22.2441	0.644175	0	0	0	0	0	0	0
feldspar_0	34.1266	K0.04Na0.60Ca0.36Al1.36Si2.64O8	59.0778	0	25.8005	0	0	0	0	0	0	0	7.50068	6.95609	0.664896	0	0	0	0	0	0
Temperature	830	P	6250
garnet_0	16.3286	(Ca0.15Fe''0.54Mg0.31)3Al2Si3O12	39.0749	0	22.103	0	0	25.1139	0	8.0725	0	0	5.63575	0	0	0	0	0	0	0	0
clinopyroxene_0	15.411	cpx	Na0.01Ca0.13Fe''0.81Mg0.98Fe'''0.03Ti0.00Al0.12Si1.93O6	50.66	0.0967243	2.59412	0.874959	0	25.2593	0	17.2882	0	0	3.09172	0.134996	0	0	0	0	0	0	0
clinopyroxene_1	16.338	cpx	Na0.06Ca0.82Fe''0.30Mg0.65Fe'''0.06Ti0.05Al0.23Si1.84O6	48.9411	1.60346	5.11801	2.04422	0	9.46341	0	11.6578	0	0	20.3988	0.773176	0	0	0	0	0	0	0
clinopyroxene_2	4.5557	cpx	Na0.05Ca0.92Fe''0.23Mg0.37Fe'''0.07Ti0.38Al0.74Si1.24O6	31.9858	13.1421	16.1129	2.36981	0	7.07429	0	6.39743	0	0	22.2545	0.663202	0	0	0	0	0	0	0
feldspar_0	33.4263	K0.04Na0.62Ca0.34Al1.34Si2.66O8	59.4462	0	25.5457	0	0	0	0	0	0	0	7.20451	7.10893	0.694671	0	0	0	0	0	0
quartz	0.122946	SiO2
Temperature	820	P	6250
garnet_0	18.7023	(Ca0.15Fe''0.54Mg0.31)3Al2Si3O12	39.0826	0	22.1073	0	0	25.1242	0	8.12759	0	0	5.55827	0	0	0	0	0	0	0	0
clinopyroxene_0	13.2324	cpx	Na0.01Ca0.12Fe''0.80Mg1.00Fe'''0.02Ti0.00Al0.11Si1.94O6	50.8592	0.0911143	2.46424	0.804948	0	25.0341	0	17.6045	0	0	3.00597	0.135976	0	0	0	0	0	0	0
clinopyroxene_1	17.1945	cpx	Na0.06Ca0.82Fe''0.29Mg0.66Fe'''0.05Ti0.04Al0.22Si1.85O6	49.2054	1.56674	4.97929	1.9343	0	9.20374	0	11.8558	0	0	20.4566	0.798145	0	0	0	0	0	0	0
clinopyroxene_2	4.55557	cpx	Na0.05Ca0.92Fe''0.22Mg0.37Fe'''0.07Ti0.39Al0.74Si1.24O6	31.9473	13.2763	16.2051	2.25198	0	6.92982	0	6.44957	0	0	22.2476	0.692333	0	0	0	0	0	0	0
feldspar_0	32.4962	K0.04Na0.63Ca0.33Al1.33Si2.67O8	59.9336	0	25.2026	0	0	0	0	0	0	0	6.80771	7.2956	0.760502	0	0	0	0	0	0
quartz	0.813963	SiO2
Temperature	810	P	6250
garnet_0	20.834	(Ca0.15Fe''0.54Mg0.31)3Al2Si3O12	39.0896	0	22.1113	0	0	25.1386	0	8.1803	0	0	5.48023	0	0	0	0	0	0	0	0
clinopyroxene_0	11.2804	cpx	Na0.01Ca0.12Fe''0.79Mg1.01Fe'''0.02Ti0.00Al0.10Si1.94O6	51.0512	0.0857677	2.3397	0.739979	0	24.8103	0	17.9151	0	0	2.92114	0.13674	0	0	0	0	0	0	0
clinopyroxene_1	17.9602	cpx	Na0.06Ca0.82Fe''0.28Mg0.67Fe'''0.05Ti0.04Al0.21Si1.85O6	49.4594	1.53216	4.84611	1.83077	0	8.94732	0	12.0468	0	0	20.5147	0.822724	0	0	0	0	0	0	0
clinopyroxene_2	4.55699	cpx	Na0.05Ca0.92Fe''0.22Mg0.37Fe'''0.06Ti0.39Al0.74Si1.23O6	31.9124	13.4058	16.2933	2.13889	0	6.78913	0	6.50011	0	0	22.2386	0.721817	0	0	0	0	0	0	0
feldspar_0	31.6777	K0.05Na0.65Ca0.31Al1.31Si2.69O8	60.3958	0	24.8756	0	0	0	0	0	0	0	6.43005	7.46831	0.830246	0	0	0	0	0	0
quartz	1.45504	SiO2
Temperature	800	P	6250
garnet_0	22.7612	(Ca0.15Fe''0.54Mg0.31)3Al2Si3O12	39.096	0	22.1149	0	0	25.1562	0	8.23127	0	0	5.40156	0	0	0	0	0	0	0	0
clinopyroxene_0	9.51869	cpx	Na0.01Ca0.12Fe''0.78Mg1.03Fe'''0.02Ti0.00Al0.10Si1.94O6	51.2368	0.0806815	2.22032	0.679652	0	24.5866	0	18.2213	0	0	2.83728	0.137306	0	0	0	0	0	0	0
clinopyroxene_1	18.6512	cpx	Na0.06Ca0.82Fe''0.27Mg0.68Fe'''0.05Ti0.04Al0.21Si1.86O6	49.7037	1.49955	4.71835	1.7331	0	8.69365	0	12.2316	0	0	20.5731	0.846952	0	0	0	0	0	0	0
clinopyroxene_2	4.55893	cpx	Na0.06Ca0.92Fe''0.22Mg0.38Fe'''0.06Ti0.39Al0.75Si1.23O6	31.8808	13.5309	16.3778	2.03018	0	6.6515	0	6.54947	0	0	22.2277	0.751678	0	0	0	0	0	0	0
feldspar_0	30.9541	K0.05Na0.66Ca0.29Al1.29Si2.71O8	60.8351	0	24.5631	0	0	0	0	0	0	0	6.06976	7.62794	0.904136	0	0	0	0	0	0
quartz	2.05411	SiO2
Temperature	790	P	6250
garnet_0	24.514	(Ca0.15Fe''0.54Mg0.32)3Al2Si3O12	39.1021	0	22.1183	0	0	25.1764	0	8.28107	0	0	5.32215	0	0	0	0	0	0	0	0
clinopyroxene_0	7.91852	cpx	Na0.01Ca0.11Fe''0.77Mg1.05Fe'''0.02Ti0.00Al0.09Si1.95O6	51.4166	0.0758515	2.10594	0.623622	0	24.3616	0	18.5243	0	0	2.75439	0.137692	0	0	0	0	0	0	0
clinopyroxene_1	19.28	cpx	Na0.06Ca0.83Fe''0.26Mg0.69Fe'''0.05Ti0.04Al0.20Si1.87O6	49.939	1.46877	4.59593	1.64085	0	8.44237	0	12.4105	0	0	20.6317	0.870865	0	0	0	0	0	0	0
clinopyroxene_2	4.56072	cpx	Na0.06Ca0.92Fe''0.21Mg0.38Fe'''0.06Ti0.40Al0.75Si1.23O6	31.8526	13.6519	16.4588	1.92556	0	6.51635	0	6.59796	0	0	22.2148	0.781939	0	0	0	0	0	0	0
feldspar_0	30.3118	K0.06Na0.67Ca0.27Al1.27Si2.73O8	61.2532	0	24.2638	0	0	0	0	0	0	0	5.72529	7.77524	0.982412	0	0	0	0	0	0
quartz	2.61803	SiO2
Temperature	780	P	6250
garnet_0	26.1169	(Ca0.14Fe''0.54Mg0.32)3Al2Si3O12	39.1078	0	22.1216	0	0	25.1984	0	8.33022	0	0	5.24196	0	0	0	0	0	0	0	0
clinopyroxene_0	6.45636	cpx	Na0.01Ca0.11Fe''0.76Mg1.06Fe'''0.02Ti0.00Al0.09Si1.95O6	51.5912	0.0712727	1.99639	0.571583	0	24.1341	0	18.825	0	0	2.67249	0.137911	0	0	0	0	0	0	0
clinopyroxene_1	19.8568	cpx	Na0.06Ca0.83Fe''0.26Mg0.70Fe'''0.04Ti0.04Al0.20Si1.87O6	50.1658	1.43967	4.47877	1.55362	0	8.19319	0	12.5841	0	0	20.6904	0.894496	0	0	0	0	0	0	0
clinopyroxene_2	4.56189	cpx	Na0.06Ca0.92Fe''0.21Mg0.38Fe'''0.05Ti0.40Al0.75Si1.23O6	31.8277	13.7692	16.5365	1.8248	0	6.38314	0	6.6459	0	0	22.2001	0.812616	0	0	0	0	0	0	0
feldspar_0	29.7403	K0.06Na0.68Ca0.26Al1.26Si2.74O8	61.6519	0	23.9766	0	0	0	0	0	0	0	5.39531	7.91079	1.06533	0	0	0	0	0	0
quartz	3.15287	SiO2
Temperature	770	P	6250
garnet_0	27.5901	(Ca0.14Fe''0.54Mg0.32)3Al2Si3O12	39.1134	0	22.1248	0	0	25.2217	0	8.3792	0	0	5.16089	0	0	0	0	0	0	0	0
clinopyroxene_0	5.1129	cpx	Na0.01Ca0.10Fe''0.75Mg1.08Fe'''0.01Ti0.00Al0.08Si1.95O6	51.7612	0.0669393	1.89154	0.523264	0	23.9029	0	19.1245	0	0	2.59159	0.137978	0	0	0	0	0	0	0
clinopyroxene_1	20.3898	cpx	Na0.07Ca0.83Fe''0.25Mg0.71Fe'''0.04Ti0.04Al0.19Si1.88O6	50.3845	1.41215	4.36679	1.47106	0	7.94588	0	12.7528	0	0	20.749	0.917872	0	0	0	0	0	0	0
clinopyroxene_2	4.56216	cpx	Na0.06Ca0.92Fe''0.20Mg0.38Fe'''0.05Ti0.40Al0.75Si1.23O6	31.806	13.8831	16.6109	1.72767	0	6.25142	0	6.69355	0	0	22.1837	0.843723	0	0	0	0	0	0	0
feldspar_0	29.2313	K0.07Na0.69Ca0.24Al1.24Si2.76O8	62.0325	0	23.7005	0	0	0	0	0	0	0	5.07871	8.03507	1.15318	0	0	0	0	0	0
quartz	3.6643	SiO2
Temperature	760	P	6250
garnet_0	28.9507	(Ca0.14Fe''0.54Mg0.32)3Al2Si3O12	39.1191	0	22.128	0	0	25.2456	0	8.42849	0	0	5.0789	0	0	0	0	0	0	0	0
clinopyroxene_0	3.8721	cpx	Na0.01Ca0.10Fe''0.75Mg1.09Fe'''0.01Ti0.00Al0.08Si1.96O6	51.9271	0.0628449	1.79124	0.478417	0	23.6672	0	19.4236	0	0	2.51169	0.137903	0	0	0	0	0	0	0
clinopyroxene_1	20.8855	cpx	Na0.07Ca0.83Fe''0.24Mg0.72Fe'''0.04Ti0.04Al0.19Si1.88O6	50.5956	1.38611	4.25994	1.39287	0	7.70025	0	12.9168	0	0	20.8074	0.941017	0	0	0	0	0	0	0
clinopyroxene_2	4.56138	cpx	Na0.07Ca0.92Fe''0.20Mg0.39Fe'''0.05Ti0.41Al0.76Si1.22O6	31.7873	13.9937	16.6823	1.63403	0	6.12076	0	6.74113	0	0	22.1655	0.875264	0	0	0	0	0	0	0
feldspar_0	28.7783	K0.07Na0.70Ca0.23Al1.23Si2.77O8	62.3962	0	23.4346	0	0	0	0	0	0	0	4.77448	8.14842	1.24628	0	0	0	0	0	0
quartz	4.15784	SiO2
Temperature	750	P	6250
garnet_0	30.2434	(Ca0.14Fe''0.55Mg0.31)3Al2Si3O12	39.0591	0	22.094	0	0	25.5009	0	8.18849	0	0	5.15751	0	0	0	0	0	0	0	0
clinopyroxene_0	20.9597	cpx	Na0.07Ca0.83Fe''0.24Mg0.71Fe'''0.04Ti0.04Al0.18Si1.88O6	50.6649	1.37349	4.21702	1.37368	0	7.62997	0	12.8507	0	0	20.926	0.964286	0	0	0	0	0	0	0
clinopyroxene_1	4.62627	cpx	Na0.07Ca0.92Fe''0.20Mg0.38Fe'''0.05Ti0.41Al0.76Si1.22O6	31.7359	14.0563	16.7258	1.58959	0	6.1725	0	6.66576	0	0	22.1609	0.893252	0	0	0	0	0	0	0
orthoamphibole_0	3.17781	oAph	Ca0.18Fe2.03Mg4.79Si8O22(OH)2	56.7092	0	0	0	0	17.2034	0	22.7979	0	0	1.16415	0	0	0	0	0	0	0	2.1254
feldspar_0	28.9934	K0.08Na0.71Ca0.22Al1.22Si2.78O8	62.6708	0	23.2181	0	0	0	0	0	0	0	4.53177	8.19274	1.38658	0	0	0	0	0	0
feldspar_1	0.075703	K0.71Na0.28Ca0.01Al1.01Si2.99O8	65.4996	0	18.878	0	0	0	0	0	0	0	0.291101	3.11826	12.2131	0	0	0	0	0	0
quartz	4.81292	SiO2
Temperature	740	P	6250
garnet_0	25.0296	(Ca0.17Fe''0.55Mg0.28)3Al2Si3O12	38.943	0	22.0284	0	0	25.421	0	7.40278	0	0	6.20479	0	0	0	0	0	0	0	0
orthopyroxene_0	8.95424	opx	Na0.00Ca0.03Fe''0.78Mg1.15Fe'''0.01Ti0.00Al0.08Si1.95O6	51.9523	0.0237471	1.85126	0.341125	0	24.6522	0	20.4262	0	0	0.718818	0.0343239	0	0	0	0	0	0	0
clinopyroxene_0	17.569	cpx	Na0.07Ca0.86Fe''0.23Mg0.69Fe'''0.04Ti0.04Al0.20Si1.88O6	50.4746	1.29597	4.55059	1.33449	0	7.29209	0	12.52	0	0	21.6252	0.906963	0	0	0	0	0	0	0
clinopyroxene_1	5.03048	cpx	Na0.06Ca0.93Fe''0.20Mg0.37Fe'''0.04Ti0.41Al0.78Si1.20O6	31.1941	14.1665	17.1983	1.48172	0	6.28842	0	6.43435	0	0	22.4882	0.748407	0	0	0	0	0	0	0
feldspar_0	31.3285	K0.06Na0.67Ca0.27Al1.27Si2.73O8	61.3686	0	24.1528	0	0	0	0	0	0	0	5.60677	7.74109	1.13082	0	0	0	0	0	0
feldspar_1	0.269322	K0.75Na0.24Ca0.01Al1.01Si2.99O8	65.3657	0	18.8333	0	0	0	0	0	0	0	0.285505	2.70283	12.8127	0	0	0	0	0	0
quartz	4.11507	SiO2
Temperature	730	P	6250
olivine_0	0.007289	(Ca0.00Mg0.21Fe''0.41Mn0.37Co0.00Ni0.00)2SiO4	31.6857	0	0	0	0	31.353	27.8312	9.05235	0	0	0.0776587	0	0	0	0	0	0	0	0
garnet_0	28.0575	(Ca0.17Fe''0.56Mg0.27)3Al2Si3O12	38.8501	0	21.9758	0	0	25.8996	0	7.07817	0	0	6.19621	0	0	0	0	0	0	0	0
orthopyroxene_0	3.80963	opx	Na0.00Ca0.03Fe''0.80Mg1.12Fe'''0.01Ti0.00Al0.08Si1.96O6	51.7812	0.021055	1.80747	0.34004	0	25.4461	0	19.9021	0	0	0.668109	0.0339335	0	0	0	0	0	0	0
clinopyroxene_0	13.8151	cpx	Na0.07Ca0.86Fe''0.23Mg0.69Fe'''0.04Ti0.04Al0.20Si1.88O6	50.5207	1.29457	4.45936	1.36582	0	7.48672	0	12.3492	0	0	21.5647	0.958999	0	0	0	0	0	0	0
clinopyroxene_1	5.43412	cpx	Na0.06Ca0.93Fe''0.21Mg0.36Fe'''0.04Ti0.41Al0.78Si1.21O6	31.2387	14.1829	17.112	1.48899	0	6.49052	0	6.29233	0	0	22.3946	0.799972	0	0	0	0	0	0	0
clinoamphibole_0	6.88943	cAph	Ca1.68Fe1.03Mg4.29Si8O22(OH)2	57.2397	0	0	0	0	8.77822	0	20.5874	0	0	11.2493	0	0	0	0	0	0	0	2.14529
feldspar_0	30.9563	K0.07Na0.69Ca0.25Al1.25Si2.75O8	61.8882	0	23.7989	0	0	0	0	0	0	0	5.19359	7.97128	1.14808	0	0	0	0	0	0
feldspar_1	1.15413	K0.74Na0.24Ca0.01Al1.01Si2.99O8	65.4087	0	18.8146	0	0	0	0	0	0	0	0.26006	2.74966	12.767	0	0	0	0	0	0
quartz	5.15827	SiO2
Phase Masses
Temperature (oC)	Pressure (bars)	liquid_0	olivine_0	garnet_0	orthopyroxene_0	clinopyroxene_0	clinopyroxene_1	clinopyroxene_2	clinoamphibole_0	orthoamphibole_0	feldspar_0	feldspar_1	quartz	spinel_0
1300	6250	100.222	0	0	0	0	0	0	0	0	0	0	0	0
1290	6250	100.223	0	0	0	0	0	0	0	0	0	0	0	0
1280	6250	100.223	0	0	0	0	0	0	0	0	0	0	0	0
1270	6250	99.9051	0	0	0.318795	0	0	0	0	0	0	0	0	0
1260	6250	98.5498	0	0	1.67409	0	0	0	0	0	0	0	0	0
1250	6250	97.2237	0	0	3.0001	0	0	0	0	0	0	0	0	0
1240	6250	94.3701	0	0	0	5.85303	0	0	0	0	0	0	0	0
1230	6250	91.9815	0	0	0	8.24145	0	0	0	0	0	0	0	0
1220	6250	89.1184	0	0	0	11.1051	0	0	0	0	0	0	0	0
1210	6250	85.6056	0	0	0	10.795	3.8257	0	0	0	0	0	0	0
1200	6250	82.2397	0	0	0	10.085	7.9051	0	0	0	0	0	0	0
1190	6250	75.339	0	0	0	12.6706	8.41807	0	0	0	3.80101	0	0	0
1180	6250	68.7201	0	0	0	15.2827	8.51506	0	0	0	7.70884	0	0	0
1170	6250	62.9102	0	0	0	17.451	8.7425	0	0	0	11.1211	0	0	0
1160	6250	57.7668	0	0	0	19.2649	9.06968	0	0	0	14.1215	0	0	0
1150	6250	53.185	0	0	0	20.7943	9.46707	0	0	0	16.7745	0	0	0
1140	6250	49.0861	0	0	0	22.0936	9.90841	0	0	0	19.1307	0	0	0
1130	6250	45.409	0	0	0	23.2051	10.3714	0	0	0	21.2312	0	0	0
1120	6250	42.1049	0	0	0	24.1619	10.8376	0	0	0	23.1099	0	0	0
1110	6250	38.7029	0	0	0	23.6392	11.4455	0	0	0	25.3563	0	0	1.09754
1100	6250	36.0481	0	0	0	23.8473	11.8615	0	0	0	27.0474	0	0	1.44293
1090	6250	33.7323	0	0	0	24.0236	12.2259	0	0	0	28.5506	0	0	1.71836
1080	6250	31.698	0	0	0	24.1774	12.5479	0	0	0	29.8915	0	0	1.93772
1070	6250	29.899	0	0	0	24.316	12.8344	0	0	0	31.092	0	0	2.11149
1060	6250	28.2982	0	0	0	24.4453	13.0907	0	0	0	32.1705	0	0	2.24758
1050	6250	26.8652	0	0	0	24.57	13.3209	0	0	0	33.1426	0	0	2.35198
1040	6250	25.5754	0	0	0	24.6941	13.5283	0	0	0	34.0216	0	0	2.42918
1030	6250	24.4081	0	0	0	24.8213	13.7155	0	0	0	34.8184	0	0	2.48252
1020	6250	23.3462	0	0	0	24.9549	13.8847	0	0	0	35.5423	0	0	2.51438
1010	6250	22.3743	0	0	0	25.0981	14.0373	0	0	0	36.2026	0	0	2.52647
1000	6250	21.4815	0	0	0	25.2545	14.1751	0	0	0	36.804	0	0	2.51953
990	6250	20.6567	0	0	0	25.4278	14.299	0	0	0	37.3528	0	0	2.49386
980	6250	19.8905	0	0	0	25.6225	14.4096	0	0	0	37.8535	0	0	2.44907
970	6250	19.1745	0	0	0	25.8436	14.5072	0	0	0	38.3102	0	0	2.38413
960	6250	18.4441	0	0	0	26.3039	13.9168	0.666119	0	0	38.6826	0	0	2.1971
950	6250	17.741	0	0	0	26.8075	13.2228	1.43531	0	0	39.0152	0	0	1.97839
940	6250	17.0778	0	0	0	27.2906	12.6191	2.11757	0	0	39.3248	0	0	1.75983
930	6250	16.4506	0	0	0	27.7539	12.0953	2.72264	0	0	39.6141	0	0	1.54221
920	6250	15.8559	0	0	0	28.1986	11.6425	3.25885	0	0	39.8856	0	0	1.32623
910	6250	15.2909	0	0	0	28.6254	11.2528	3.73339	0	0	40.1413	0	0	1.11247
900	6250	14.782	0	0.521778	0	28.666	11.0779	4.16943	0	0	40.0923	0	0	0.831895
890	6250	14.4687	0	4.32257	0	26.4075	11.9011	4.68377	0	0	38.211	0	0	0.109113
880	6250	14.3576	0	6.81022	0	24.2672	12.7715	4.71022	0	0	37.1748	0	0	0
870	6250	14.2877	0	8.9545	0	22.2564	13.5977	4.66075	0	0	36.3273	0	0	0
860	6250	14.2184	0	10.9498	0	20.3933	14.3541	4.62237	0	0	35.5398	0	0	0
850	6250	14.1493	0	12.8091	0	18.6643	15.0487	4.59283	0	0	34.8077	0	0	0
840	6250	14.0801	0	14.5443	0	17.0568	15.6884	4.57035	0	0	34.1266	0	0	0
830	6250	13.8791	0	16.3286	0	15.411	16.338	4.5557	0	0	33.4263	0	0.122946	0
820	6250	13.0628	0	18.7023	0	13.2324	17.1945	4.55557	0	0	32.4962	0	0.813963	0
810	6250	12.2897	0	20.834	0	11.2804	17.9602	4.55699	0	0	31.6777	0	1.45504	0
800	6250	11.5526	0	22.7612	0	9.51869	18.6512	4.55893	0	0	30.9541	0	2.05411	0
790	6250	10.8448	0	24.514	0	7.91852	19.28	4.56072	0	0	30.3118	0	2.61803	0
780	6250	10.16	0	26.1169	0	6.45636	19.8568	4.56189	0	0	29.7403	0	3.15287	0
770	6250	9.492	0	27.5901	0	5.1129	20.3898	4.56216	0	0	29.2313	0	3.6643	0
760	6250	8.83434	0	28.9507	0	3.8721	20.8855	4.56138	0	0	28.7783	0	4.15784	0
750	6250	7.14841	0	30.2434	0	20.9597	4.62627	0	0	3.17781	28.9934	0.075703	4.81292	0
740	6250	7.73918	0	25.0296	8.95424	17.569	5.03048	0	0	0	31.3285	0.269322	4.11507	0
730	6250	4.74746	0.007289	28.0575	3.80963	13.8151	5.43412	0	6.88943	0	30.9563	1.15413	5.15827	0
Residual bulk compositions
Temperature (oC)	SiO2	TiO2	Al2O3	Fe2O3	FeO	MnO	MgO	CaO	Na2O	K2O	H2O
1300	---
1290	---
1280	---
1270	53.8725	0.0897373	3.26631	1.57035	10.5677	0	29.034	1.56156	0.037758	0	0
1260	53.7147	0.0905413	3.32387	1.59298	10.9207	0	28.6478	1.66983	0.0396546	0	0
1250	53.555	0.0910696	3.37981	1.61384	11.2831	0	28.2473	1.78833	0.0416624	0	0
1240	51.6348	0.137111	4.46852	2.21423	12.5898	0	23.3764	5.4427	0.136446	0	0
1230	51.1939	0.152871	4.76245	2.36066	12.631	0	22.2395	6.49691	0.162706	0	0
1220	50.654	0.178787	5.14865	2.56033	12.4323	0	20.8052	8.01842	0.202374	0	0
1210	49.9828	0.235773	5.66818	2.86112	11.8003	0	19.0883	10.1027	0.260803	0	0
1200	49.4265	0.289842	6.11406	3.11512	11.505	0	17.8832	11.3584	0.30787	0	0
1190	49.6255	0.269647	9.88762	2.72342	10.3268	0	14.9281	11.3527	0.865785	0.0204412	0
1180	49.8362	0.262098	12.057	2.49087	9.75466	0	13.1325	11.1861	1.24402	0.0365549	0
1170	49.9921	0.266723	13.2642	2.37414	9.52231	0	12.0055	11.0264	1.49932	0.0492628	0
1160	50.1166	0.278336	14.0077	2.31128	9.44851	0	11.2099	10.8758	1.69149	0.0603337	0
1150	50.2202	0.294886	14.4941	2.27612	9.45745	0	10.6063	10.7351	1.84543	0.0704638	0
1140	50.3084	0.315426	14.8248	2.25541	9.51132	0	10.1266	10.6045	1.97352	0.0799662	0
1130	50.3849	0.339452	15.0559	2.24156	9.58892	0	9.73343	10.4841	2.08276	0.088998	0
1120	50.4521	0.366651	15.2208	2.22991	9.67758	0	9.40412	10.3737	2.17746	0.097646	0
1110	49.9652	0.499303	15.3606	2.79663	9.70298	0	9.06133	10.2223	2.28495	0.106653	0
1100	49.9108	0.552621	15.4608	2.90981	9.73697	0	8.82143	10.1266	2.3662	0.114846	0
1090	49.8984	0.597119	15.5395	2.97422	9.76336	0	8.62167	10.0455	2.43756	0.122666	0
1080	49.9133	0.634939	15.6025	3.00475	9.78517	0	8.45271	9.97602	2.50049	0.130137	0
1070	49.9459	0.667607	15.6537	3.01116	9.80436	0	8.30791	9.91588	2.55623	0.137284	0
1060	49.9901	0.696237	15.6958	3.00004	9.82221	0	8.18238	9.86334	2.60578	0.144131	0
1050	50.0419	0.721663	15.7308	2.97587	9.83959	0	8.07246	9.81704	2.64997	0.150704	0
1040	50.0985	0.744521	15.7603	2.94179	9.85714	0	7.97534	9.77589	2.68951	0.157027	0
1030	50.1582	0.765307	15.7853	2.89994	9.87535	0	7.88882	9.73905	2.72496	0.163126	0
1020	50.2197	0.784418	15.8067	2.85179	9.89461	0	7.81119	9.70578	2.75681	0.169025	0
1010	50.2826	0.802173	15.8251	2.79829	9.91517	0	7.74093	9.67536	2.78556	0.174758	0
1000	50.3462	0.818852	15.8412	2.74002	9.93756	0	7.67704	9.64747	2.81138	0.180341	0
990	50.4103	0.834688	15.8552	2.67719	9.96213	0	7.61853	9.62159	2.8346	0.185804	0
980	50.475	0.849892	15.8675	2.60969	9.98937	0	7.56457	9.59732	2.85543	0.191178	0
970	50.5406	0.864657	15.8785	2.53712	10.0199	0	7.51445	9.57429	2.87403	0.196498	0
960	50.6175	0.887512	15.8943	2.41843	10.0806	0	7.4639	9.54803	2.88711	0.202566	0
950	50.6994	0.909838	15.9093	2.28617	10.1518	0	7.41537	9.52142	2.89792	0.208828	0
940	50.7831	0.929298	15.9218	2.15244	10.2255	0	7.36962	9.49554	2.90762	0.215073	0
930	50.8683	0.946243	15.9321	2.01741	10.3016	0	7.32638	9.47033	2.91631	0.221309	0
920	50.9547	0.960973	15.9405	1.88126	10.3798	0	7.28542	9.44573	2.92405	0.227547	0
910	51.0419	0.973746	15.9472	1.74418	10.46	0	7.24653	9.42169	2.93092	0.233796	0
900	51.1159	0.984316	15.9626	1.56595	10.5823	0	7.21231	9.40158	2.93502	0.240012	0
890	51.1048	0.990659	16.043	1.12895	10.9622	0	7.19604	9.40252	2.92543	0.246345	0
880	51.0161	0.995404	16.1087	0.992124	11.1016	0	7.19181	9.41344	2.93088	0.25003	0
870	50.9169	0.999795	16.17	0.91522	11.19	0	7.18991	9.4261	2.93885	0.253275	0
860	50.8237	1.00406	16.2288	0.845124	11.2693	0	7.18774	9.43806	2.94656	0.256671	0
850	50.7362	1.00819	16.2853	0.781116	11.3403	0	7.18533	9.44931	2.95402	0.26021	0
840	50.6541	1.01219	16.3394	0.722566	11.4041	0	7.18267	9.45982	2.96129	0.263886	0
830	50.6302	1.01597	16.3816	0.66926	11.443	0	7.1691	9.45842	2.963	0.269431	0
820	50.8597	1.01875	16.3744	0.622677	11.3911	0	7.10605	9.40335	2.9399	0.284078	0
810	51.0766	1.02064	16.3659	0.580818	11.3399	0	7.0473	9.35011	2.91903	0.29967	0
800	51.2831	1.02175	16.3562	0.542941	11.2894	0	6.9921	9.29832	2.90002	0.31624	0
790	51.4812	1.02217	16.3452	0.508455	11.2392	0	6.93982	9.24764	2.88251	0.33383	0
780	51.6729	1.02198	16.3328	0.476884	11.1891	0	6.8899	9.19769	2.8662	0.352486	0
770	51.86	1.02123	16.3192	0.447838	11.1387	0	6.8418	9.14814	2.85084	0.372265	0
760	52.0443	1.01993	16.3041	0.420989	11.0877	0	6.79502	9.09858	2.8362	0.393241	0
750	52.466	1.00998	16.2405	0.389129	10.9203	0	6.67763	8.95925	2.8218	0.442744	0.0727117
740	52.3892	1.02112	16.2103	0.36788	11.0164	0	6.72315	8.99851	2.85225	0.421225	0
730	53.0714	0.997424	16.1259	0.29655	10.7368	0.00212916	6.51871	8.75913	2.80914	0.527646	0.155117
Bulk composition
Temperature (oC)	SiO2	TiO2	Al2O3	Fe2O3	FeO	MnO	MgO	CaO	Na2O	K2O	H2O
1300	53.7008	0.957874	15.9246	2.21076	8.49745	0.219513	6.20622	8.39137	2.76386	0.628605	0.498893
1290	53.7005	0.957868	15.9245	2.21704	8.49174	0.219511	6.20618	8.39132	2.76385	0.628601	0.498889
1280	53.7001	0.957861	15.9244	2.22366	8.48571	0.21951	6.20614	8.39126	2.76383	0.628596	0.498886
1270	53.6998	0.957856	15.9244	2.22924	8.48064	0.219509	6.20611	8.39122	2.76381	0.628593	0.498883
1260	53.6998	0.957856	15.9243	2.22964	8.48027	0.219509	6.20611	8.39121	2.76381	0.628593	0.498883
1250	53.6998	0.957856	15.9244	2.22882	8.48101	0.219509	6.20611	8.39122	2.76381	0.628593	0.498883
1240	53.7002	0.957863	15.9245	2.22185	8.48736	0.21951	6.20615	8.39128	2.76383	0.628598	0.498887
1230	53.7003	0.957865	15.9245	2.22025	8.48881	0.219511	6.20616	8.39129	2.76384	0.628599	0.498888
1220	53.7	0.95786	15.9244	2.22511	8.48439	0.21951	6.20613	8.39125	2.76382	0.628596	0.498885
1210	53.6985	0.957833	15.924	2.25306	8.45895	0.219503	6.20596	8.39102	2.76375	0.628578	0.498871
1200	53.6966	0.957799	15.9234	2.28857	8.42662	0.219496	6.20574	8.39072	2.76365	0.628555	0.498854
1190	53.6972	0.95781	15.9236	2.27693	8.43722	0.219498	6.20581	8.39081	2.76368	0.628563	0.498859
1180	53.6983	0.957829	15.9239	2.2575	8.45491	0.219502	6.20593	8.39098	2.76373	0.628575	0.498869
1170	53.6993	0.957847	15.9242	2.23856	8.47215	0.219507	6.20605	8.39114	2.76379	0.628587	0.498879
1160	53.7003	0.957865	15.9245	2.21964	8.48937	0.219511	6.20617	8.3913	2.76384	0.628599	0.498888
1150	53.7014	0.957884	15.9248	2.20025	8.50702	0.219515	6.20629	8.39146	2.76389	0.628611	0.498898
1140	53.7025	0.957903	15.9251	2.17989	8.52556	0.21952	6.20642	8.39163	2.76395	0.628624	0.498908
1130	53.7036	0.957924	15.9255	2.15807	8.54542	0.219524	6.20655	8.39182	2.76401	0.628638	0.498919
1120	53.7049	0.957947	15.9259	2.1344	8.56697	0.21953	6.2067	8.39202	2.76408	0.628653	0.498931
1110	53.6904	0.957688	15.9216	2.40422	8.32134	0.21947	6.20502	8.38974	2.76333	0.628482	0.498796
1100	53.6873	0.957632	15.9206	2.46153	8.26917	0.219457	6.20466	8.38926	2.76317	0.628446	0.498767
1090	53.6854	0.957599	15.9201	2.49638	8.23744	0.21945	6.20444	8.38897	2.76307	0.628424	0.498749
1080	53.6844	0.957582	15.9198	2.51397	8.22143	0.219446	6.20433	8.38882	2.76302	0.628413	0.498741
1070	53.6842	0.957578	15.9197	2.51815	8.21762	0.219445	6.20431	8.38878	2.76301	0.628411	0.498739
1060	53.6846	0.957584	15.9198	2.51175	8.22345	0.219446	6.20435	8.38884	2.76303	0.628415	0.498742
1050	53.6854	0.957598	15.9201	2.49687	8.23699	0.21945	6.20444	8.38896	2.76307	0.628424	0.498749
1040	53.6865	0.957619	15.9204	2.47507	8.25684	0.219454	6.20458	8.38915	2.76313	0.628438	0.49876
1030	53.688	0.957646	15.9209	2.44749	8.28195	0.219461	6.20475	8.38938	2.76321	0.628455	0.498774
1020	53.6898	0.957677	15.9214	2.41491	8.31161	0.219468	6.20495	8.38965	2.7633	0.628476	0.49879
1010	53.6918	0.957713	15.922	2.37789	8.34531	0.219476	6.20518	8.38996	2.7634	0.628499	0.498809
1000	53.694	0.957753	15.9226	2.33671	8.3828	0.219485	6.20544	8.39031	2.76352	0.628525	0.498829
990	53.6964	0.957796	15.9234	2.29144	8.42401	0.219495	6.20572	8.39069	2.76364	0.628554	0.498852
980	53.6991	0.957844	15.9242	2.24194	8.46907	0.219506	6.20603	8.39111	2.76378	0.628585	0.498877
970	53.702	0.957896	15.925	2.18782	8.51834	0.219518	6.20637	8.39157	2.76393	0.628619	0.498904
960	53.7069	0.957983	15.9265	2.09745	8.60061	0.219538	6.20693	8.39233	2.76418	0.628676	0.498949
950	53.7124	0.958081	15.9281	1.99486	8.69399	0.21956	6.20757	8.39319	2.76446	0.628741	0.499001
940	53.7181	0.958183	15.9298	1.88938	8.79002	0.219584	6.20823	8.39408	2.76476	0.628807	0.499054
930	53.724	0.958287	15.9315	1.78121	8.88849	0.219607	6.2089	8.39499	2.76506	0.628876	0.499108
920	53.7299	0.958393	15.9333	1.67061	8.98917	0.219632	6.20959	8.39592	2.76536	0.628946	0.499163
910	53.736	0.958502	15.9351	1.55782	9.09185	0.219657	6.21029	8.39687	2.76568	0.629017	0.49922
900	53.7441	0.958645	15.9375	1.40834	9.22793	0.21969	6.21122	8.39813	2.76609	0.629111	0.499294
890	53.7642	0.959005	15.9435	1.03467	9.5681	0.219772	6.21355	8.40128	2.76713	0.629347	0.499482
880	53.7708	0.959122	15.9454	0.912529	9.67929	0.219799	6.21431	8.40231	2.76747	0.629424	0.499543
870	53.7746	0.959191	15.9465	0.841391	9.74405	0.219815	6.21476	8.40291	2.76766	0.629469	0.499579
860	53.7781	0.959253	15.9476	0.776551	9.80307	0.219829	6.21516	8.40346	2.76784	0.62951	0.499611
850	53.7813	0.95931	15.9485	0.717352	9.85697	0.219842	6.21553	8.40396	2.76801	0.629547	0.499641
840	53.7842	0.959362	15.9494	0.663212	9.90625	0.219854	6.21587	8.40441	2.76816	0.629581	0.499668
830	53.7869	0.959409	15.9502	0.614674	9.95044	0.219865	6.21617	8.40482	2.76829	0.629612	0.499692
820	53.789	0.959447	15.9508	0.575456	9.98614	0.219873	6.21641	8.40515	2.7684	0.629637	0.499712
810	53.7909	0.959481	15.9514	0.539882	10.0185	0.219881	6.21664	8.40545	2.7685	0.629659	0.49973
800	53.7926	0.959512	15.9519	0.507426	10.0481	0.219888	6.21684	8.40572	2.76859	0.62968	0.499746
790	53.7942	0.959541	15.9524	0.477665	10.0752	0.219895	6.21702	8.40598	2.76867	0.629699	0.499761
780	53.7957	0.959567	15.9528	0.45025	10.1001	0.219901	6.21719	8.40621	2.76875	0.629716	0.499774
770	53.7971	0.959591	15.9532	0.424895	10.1232	0.219906	6.21735	8.40642	2.76882	0.629732	0.499787
760	53.7984	0.959614	15.9536	0.401357	10.1446	0.219912	6.2175	8.40662	2.76889	0.629747	0.499799
750	53.7998	0.959639	15.954	0.375408	10.1683	0.219917	6.21766	8.40684	2.76896	0.629763	0.499812
740	53.801	0.959661	15.9544	0.352159	10.1894	0.219922	6.21781	8.40703	2.76902	0.629778	0.499824
730	53.8043	0.95972	15.9553	0.291445	10.2447	0.219936	6.21818	8.40754	2.76919	0.629816	0.499854

## Sheet: 560 Ma FC
Liquid Thermodynamic Data
Pressure (bars)	Temperature (oC)	F	phi	S	H	V	dVdP*10^6	dVdT*10^6	Cp	mass	fO2-(QFM-1.0)	rhol	rhos	viscosity	aH2O
2000	1100	1	1	280.867	-1.27456e+06	44.5991	-724.548	5656.51	135.151	99.5618	0	2.23237	0	4.001	0.68458
2000	1090	1	1	279.88	-1.27591e+06	44.5429	-721.439	5644.2	135.106	99.5622	0	2.2352	0	4.063	0.683296
2000	1080	1	1	278.886	-1.27727e+06	44.4868	-718.337	5631.67	135.06	99.5626	0	2.23802	0	4.127	0.682047
2000	1070	1	1	277.885	-1.27863e+06	44.4309	-715.242	5618.9	135.013	99.563	0	2.24085	0	4.191	0.680834
2000	1060	1	1	276.877	-1.27998e+06	44.3751	-712.154	5605.91	134.965	99.5634	0	2.24368	0	4.257	0.679661
2000	1050	1	1	275.861	-1.28134e+06	44.3195	-709.073	5592.69	134.915	99.5639	0	2.2465	0	4.323	0.678529
2000	1040	1	1	274.839	-1.2827e+06	44.264	-705.998	5579.25	134.864	99.5643	0	2.24933	0	4.391	0.677441
2000	1030	1	1	273.809	-1.28405e+06	44.2086	-702.931	5565.58	134.811	99.5648	0	2.25216	0	4.459	0.6764
2000	1020	1	1	272.771	-1.28541e+06	44.1535	-699.871	5551.68	134.757	99.5653	0	2.25498	0	4.529	0.675408
2000	1010	1	1	271.726	-1.28676e+06	44.0984	-696.819	5537.56	134.702	99.5658	0	2.25781	0	4.6	0.674469
2000	1000	1	1	270.673	-1.28812e+06	44.0436	-693.773	5523.21	134.645	99.5664	0	2.26063	0	4.671	0.673586
2000	990	1	1	269.612	-1.28947e+06	43.9888	-690.735	5508.64	134.586	99.5669	0	2.26346	0	4.744	0.672762
2000	980	1	1	268.543	-1.29083e+06	43.9343	-687.704	5493.84	134.526	99.5675	0	2.26628	0	4.818	0.672
2000	970	1	1	267.466	-1.29218e+06	43.8799	-684.68	5478.82	134.464	99.5682	0	2.26911	0	4.894	0.671305
2000	960	1	1	266.381	-1.29354e+06	43.8257	-681.664	5463.57	134.401	99.5688	0	2.27193	0	4.97	0.670681
2000	950	1	1	265.288	-1.29489e+06	43.7717	-678.655	5448.1	134.336	99.5695	0	2.27475	0	5.048	0.670132
2000	940	1	1	264.186	-1.29625e+06	43.7178	-675.654	5432.4	134.27	99.5702	0	2.27756	0	5.127	0.669662
2000	930	1	1	263.076	-1.2976e+06	43.6642	-672.661	5416.49	134.202	99.5709	0	2.28038	0	5.207	0.669276
2000	920	1	1	261.956	-1.29895e+06	43.6107	-669.675	5400.35	134.132	99.5717	0	2.2832	0	5.289	0.66898
2000	910	1	1	260.828	-1.30031e+06	43.5574	-666.698	5383.99	134.06	99.5725	0	2.28601	0	5.372	0.668778
2000	900	1	1	259.692	-1.30166e+06	43.5043	-663.728	5367.41	133.987	99.5734	0	2.28882	0	5.456	0.668678
2000	890	0.995381	0.997811	258.383	-1.3034e+06	43.4594	-660.674	5331.54	133.755	99.585	0	2.28587	4.83654	5.582	0.670444
2000	880	0.99062	0.99481	255.999	-1.3026e+06	43.2908	-657.015	5293.27	132.974	99.1186	0	2.27995	4.138	5.728	0.677098
2000	870	0.99583	0.997706	252.918	-1.29734e+06	43.0049	-653.613	5258.79	131.862	98.1868	0	2.27886	4.15058	5.844	0.680289
2000	860	0.996083	0.997852	250.839	-1.29584e+06	42.8459	-650.329	5229.58	131.264	97.7755	0	2.27798	4.16239	5.962	0.683468
2000	850	0.996328	0.997993	248.82	-1.29453e+06	42.6944	-647.076	5200.89	130.699	97.3907	0	2.27731	4.17347	6.079	0.686646
2000	840	0.949565	0.955696	246.122	-1.29422e+06	42.4629	-632.663	5116.38	129.531	97.0307	0	2.27041	2.6013	6.089	0.725567
2000	830	0.961011	0.966932	233.88	-1.23231e+06	40.4789	-618.585	4991.7	123.11	92.1471	0	2.26248	2.68404	6.135	0.758425
2000	820	0.965311	0.970049	224.623	-1.18809e+06	39.043	-606.391	4894.4	118.36	88.5627	0	2.25726	2.62721	6.167	0.788647
2000	810	0.966518	0.971155	216.532	-1.14935e+06	37.7806	-594.919	4804.5	114.211	85.4978	0	2.2522	2.62684	6.199	0.818384
2000	800	0.963122	0.96956	208.824	-1.11325e+06	36.5868	-583.595	4715.37	110.222	82.633	0	2.24355	2.73621	6.251	0.853098
2000	790	0.967639	0.972527	201.027	-1.07628e+06	35.3803	-572.993	4631.35	106.202	79.5865	0	2.23815	2.6497	6.284	0.883694
2000	780	0.967969	0.972904	194.221	-1.04395e+06	34.3197	-562.813	4552	102.701	77.0131	0	2.23261	2.65267	6.317	0.913902
2000	770	0.969033	0.97384	187.726	-1.01295e+06	33.3049	-553.056	4475.91	99.3587	74.5486	0	2.22732	2.64964	6.348	0.943517
2000	760	0.970036	0.974719	181.634	-983900	32.3523	-543.718	4403.28	96.2266	72.2425	0	2.22226	2.64662	6.378	0.97255
2000	750	0.970288	0.974595	175.898	-956620	31.4625	-538.802	4348.71	93.2883	70.0803	0	2.21758	2.6051	6.411	1.00015
2000	740	0.951281	0.947939	170.112	-930529	30.7761	-644.367	4714.01	90.5549	68.0001	0	2.2173	2.06768	6.58	1.00013
2000	730	0.955082	0.95203	160.657	-887594	29.2687	-599.121	4386.33	85.8568	64.6895	0	2.21728	2.06956	6.748	1.00011
2000	720	0.958383	0.95557	152.31	-849927	27.9453	-560.35	4099.24	81.7288	61.7864	0	2.21748	2.07097	6.917	1.00009
2000	710	0.398162	0.386475	139.538	-821740	27.4223	-1340.9	7476.79	78.452	59.2121	0	2.22457	2.11814	7.116	1.00007
2000	700	0.373437	0.361876	54.8589	-328035	10.8566	-520.572	2960.64	31.3206	23.5785	0	2.2412	2.13246	7.244	1.00005
Liquid Compositions
Temperature (oC)	SiO2	TiO2	Al2O3	Fe2O3	FeO	MnO	MgO	CaO	Na2O	K2O	P2O5	H2O
1100	68.5736	0.381634	13.307	0.518298	3.95263	0.080344	0.180774	1.69727	2.99282	4.70013	0.10043	3.51505
1090	68.5734	0.381633	13.3069	0.522021	3.94926	0.0803437	0.180773	1.69726	2.9928	4.70011	0.10043	3.51504
1080	68.5731	0.381631	13.3069	0.525909	3.94575	0.0803434	0.180773	1.69726	2.99279	4.70009	0.100429	3.51503
1070	68.5728	0.38163	13.3068	0.529969	3.94208	0.0803431	0.180772	1.69725	2.99278	4.70007	0.100429	3.51501
1060	68.5726	0.381628	13.3068	0.534206	3.93824	0.0803428	0.180771	1.69724	2.99277	4.70005	0.100428	3.515
1050	68.5722	0.381626	13.3067	0.53863	3.93424	0.0803424	0.18077	1.69723	2.99275	4.70003	0.100428	3.51498
1040	68.5719	0.381625	13.3067	0.543247	3.93007	0.080342	0.18077	1.69723	2.99274	4.70001	0.100428	3.51496
1030	68.5716	0.381623	13.3066	0.548067	3.92571	0.0803417	0.180769	1.69722	2.99273	4.69999	0.100427	3.51495
1020	68.5713	0.381621	13.3065	0.553097	3.92116	0.0803412	0.180768	1.69721	2.99271	4.69996	0.100427	3.51493
1010	68.5709	0.381619	13.3064	0.558346	3.91642	0.0803408	0.180767	1.6972	2.9927	4.69994	0.100426	3.51491
1000	68.5705	0.381617	13.3064	0.563826	3.91146	0.0803404	0.180766	1.69719	2.99268	4.69991	0.100425	3.51489
990	68.5701	0.381615	13.3063	0.569545	3.90629	0.0803399	0.180765	1.69718	2.99266	4.69989	0.100425	3.51487
980	68.5697	0.381612	13.3062	0.575514	3.90089	0.0803394	0.180764	1.69717	2.99264	4.69986	0.100424	3.51485
970	68.5693	0.38161	13.3061	0.581746	3.89526	0.0803389	0.180763	1.69716	2.99263	4.69983	0.100424	3.51483
960	68.5688	0.381607	13.306	0.588253	3.88937	0.0803384	0.180761	1.69715	2.99261	4.6998	0.100423	3.51481
950	68.5684	0.381605	13.306	0.595046	3.88323	0.0803379	0.18076	1.69714	2.99259	4.69977	0.100422	3.51478
940	68.5679	0.381602	13.3059	0.602141	3.87681	0.0803373	0.180759	1.69713	2.99256	4.69973	0.100422	3.51476
930	68.5674	0.381599	13.3058	0.60955	3.87011	0.0803367	0.180758	1.69711	2.99254	4.6997	0.100421	3.51473
920	68.5668	0.381596	13.3057	0.61729	3.86312	0.0803361	0.180756	1.6971	2.99252	4.69966	0.10042	3.5147
910	68.5663	0.381593	13.3056	0.625378	3.8558	0.0803354	0.180755	1.69709	2.99249	4.69962	0.100419	3.51467
900	68.5657	0.38159	13.3054	0.633829	3.84816	0.0803347	0.180753	1.69707	2.99247	4.69958	0.100418	3.51465
890	68.8758	0.304849	13.354	0.597231	3.54671	0.0806981	0.17767	1.70475	3.006	4.72084	0.100873	3.53054
880	69.2418	0.307928	13.4814	0.527494	3.04894	0.0760798	0.13021	1.7196	3.03466	4.76585	0.101834	3.5642
870	69.4054	0.309224	13.5381	0.499039	2.82242	0.0739911	0.110834	1.72621	3.04743	4.7859	0.102263	3.5792
860	69.56	0.310446	13.5916	0.471365	2.60775	0.0719897	0.0940926	1.73244	3.05948	4.80482	0.102667	3.59335
850	69.7058	0.311595	13.6419	0.444546	2.40493	0.0700746	0.0796702	1.73829	3.07081	4.82261	0.103047	3.60666
840	70.0887	0.328153	13.4087	0.431577	2.30737	0.0714381	0.0693627	1.78654	3.04069	4.56059	0.108523	3.79831
830	70.6084	0.267816	13.178	0.402759	2.11683	0.0741324	0.068818	1.76591	2.98219	4.47029	0.112914	3.95198
820	70.9924	0.23798	12.9379	0.394574	2.04194	0.0767964	0.0701447	1.7462	2.92292	4.36853	0.11696	4.09361
810	71.3741	0.210552	12.6972	0.386484	1.968	0.0794501	0.0714929	1.72604	2.86356	4.26702	0.121002	4.23506
800	71.8939	0.218831	12.5032	0.336912	1.67909	0.0780763	0.0533991	1.70125	2.80791	4.20444	0.125638	4.39734
790	72.2764	0.22039	12.28	0.319032	1.56061	0.0786115	0.0463086	1.67955	2.74953	4.1154	0.129839	4.54435
780	72.6784	0.202132	12.0525	0.30124	1.44555	0.0793656	0.0406352	1.65828	2.69049	4.02266	0.134131	4.6946
770	73.0747	0.185271	11.8234	0.284154	1.33676	0.0801441	0.0356911	1.63691	2.63107	3.92911	0.138414	4.84447
760	73.4653	0.169702	11.5925	0.267776	1.23413	0.0809475	0.0313859	1.61545	2.57123	3.83489	0.142684	4.99395
750	73.8652	0.15542	11.3553	0.251916	1.1367	0.08181	0.0275984	1.59296	2.50918	3.73966	0.147048	5.13721
740	74.7076	0.145034	10.9691	0.231184	1.02206	0.0836849	0.0232695	1.54249	2.39144	3.6328	0.154575	5.09675
730	75.5148	0.135346	10.5974	0.211923	0.917128	0.0854206	0.0197303	1.49664	2.27423	3.53125	0.161838	5.05423
720	76.2902	0.126289	10.2389	0.194069	0.821359	0.0870378	0.0168287	1.45477	2.15806	3.4341	0.168859	5.00957
710	76.0085	0.123531	10.5348	0.171011	0.713952	0.175432	0.0115519	1.71362	1.74332	3.44399	0.424117	4.93619
700	73.5728	0.124615	12.1375	0.14534	0.605237	0.381843	0.00734551	2.3476	1.14181	3.49538	1.13559	4.90493
Solids compositions
Temperature	1100	P	2000
Temperature	1090	P	2000
Temperature	1080	P	2000
Temperature	1070	P	2000
Temperature	1060	P	2000
Temperature	1050	P	2000
Temperature	1040	P	2000
Temperature	1030	P	2000
Temperature	1020	P	2000
Temperature	1010	P	2000
Temperature	1000	P	2000
Temperature	990	P	2000
Temperature	980	P	2000
Temperature	970	P	2000
Temperature	960	P	2000
Temperature	950	P	2000
Temperature	940	P	2000
Temperature	930	P	2000
Temperature	920	P	2000
Temperature	910	P	2000
Temperature	900	P	2000
Temperature	890	P	2000
spinel_0	0.460024	Fe''1.43Mg0.05Fe'''0.95Al0.11Cr0.00Ti0.47O4	0	16.9079	2.50282	33.8476	0	45.9011	0	0.840618	0	0	0	0	0	0	0	0	0	0	0
Temperature	880	P	2000
olivine_0	0.92971	(Ca0.00Mg0.13Fe''0.86Mn0.01Co0.00Ni0.00)2SiO4	30.6978	0	0	0	0	63.3926	0.569007	5.19216	0	0	0.148368	0	0	0	0	0	0	0	0
Temperature	870	P	2000
olivine_0	0.409459	(Ca0.00Mg0.12Fe''0.87Mn0.01Co0.00Ni0.00)2SiO4	30.6007	0	0	0	0	63.9023	0.576608	4.77047	0	0	0.149877	0	0	0	0	0	0	0	0
Temperature	860	P	2000
olivine_0	0.383021	(Ca0.00Mg0.11Fe''0.88Mn0.01Co0.00Ni0.00)2SiO4	30.5109	0	0	0	0	64.3725	0.584787	4.38062	0	0	0.151204	0	0	0	0	0	0	0	0
Temperature	850	P	2000
olivine_0	0.357608	(Ca0.00Mg0.10Fe''0.89Mn0.01Co0.00Ni0.00)2SiO4	30.4278	0	0	0	0	64.806	0.593609	4.02018	0	0	0.152351	0	0	0	0	0	0	0	0
Temperature	840	P	2000
olivine_0	0.365803	(Ca0.00Mg0.09Fe''0.90Mn0.01Co0.00Ni0.00)2SiO4	30.3476	0	0	0	0	65.2331	0.596107	3.67354	0	0	0.149658	0	0	0	0	0	0	0	0
feldspar_0	0.256103	K0.08Na0.63Ca0.29Al1.29Si2.71O8	60.7839	0	24.4659	0	0	0	0	0	0	0	6.00156	7.25917	1.48946	0	0	0	0	0	0
feldspar_1	4.27182	K0.64Na0.33Ca0.03Al1.03Si2.97O8	65.3988	0	19.1985	0	0	0	0	0	0	0	0.57907	3.734	11.0896	0	0	0	0	0	0
Temperature	830	P	2000
olivine_0	0.028582	(Ca0.00Mg0.09Fe''0.90Mn0.01Co0.00Ni0.00)2SiO4	30.3518	0	0	0	0	65.184	0.627804	3.69347	0	0	0.142938	0	0	0	0	0	0	0	0
feldspar_0	1.18745	K0.08Na0.63Ca0.29Al1.29Si2.71O8	60.7937	0	24.4713	0	0	0	0	0	0	0	6.00373	7.29523	1.43601	0	0	0	0	0	0
feldspar_1	2.02069	K0.65Na0.32Ca0.03Al1.03Si2.97O8	65.4147	0	19.1618	0	0	0	0	0	0	0	0.545053	3.67308	11.2054	0	0	0	0	0	0
spinel_0	0.356046	Fe''1.48Mg0.03Fe'''0.88Al0.09Cr0.00Ti0.51O4	0	18.3089	2.07382	31.4896	0	47.5804	0	0.547259	0	0	0	0	0	0	0	0	0	0	0
Temperature	820	P	2000
feldspar_0	1.02496	K0.08Na0.63Ca0.29Al1.29Si2.71O8	60.809	0	24.4726	0	0	0	0	0	0	0	6.00118	7.33254	1.38472	0	0	0	0	0	0
feldspar_1	1.85429	K0.66Na0.32Ca0.02Al1.02Si2.98O8	65.429	0	19.1266	0	0	0	0	0	0	0	0.512657	3.61287	11.3188	0	0	0	0	0	0
spinel_0	0.192914	Fe''1.46Mg0.03Fe'''0.92Al0.09Cr0.00Ti0.49O4	0	17.5701	2.04432	32.9392	0	46.9194	0	0.526966	0	0	0	0	0	0	0	0	0	0	0
Temperature	810	P	2000
feldspar_0	0.973433	K0.08Na0.64Ca0.29Al1.29Si2.71O8	60.8308	0	24.4689	0	0	0	0	0	0	0	5.99303	7.37157	1.33566	0	0	0	0	0	0
feldspar_1	1.7127	K0.66Na0.31Ca0.02Al1.02Si2.98O8	65.4421	0	19.0929	0	0	0	0	0	0	0	0.481807	3.55367	11.4295	0	0	0	0	0	0
spinel_0	0.176508	Fe''1.44Mg0.03Fe'''0.97Al0.09Cr0.00Ti0.47O4	0	16.7903	2.01706	34.4653	0	46.2208	0	0.506537	0	0	0	0	0	0	0	0	0	0	0
Temperature	800	P	2000
olivine_0	0.512597	(Ca0.00Mg0.08Fe''0.91Mn0.01Co0.00Ni0.00)2SiO4	30.2448	0	0	0	0	65.7092	0.685951	3.23555	0	0	0.124513	0	0	0	0	0	0	0	0
feldspar_0	1.09557	K0.07Na0.64Ca0.28Al1.28Si2.72O8	60.8852	0	24.4419	0	0	0	0	0	0	0	5.95806	7.42188	1.29299	0	0	0	0	0	0
feldspar_1	1.4392	K0.67Na0.31Ca0.02Al1.02Si2.98O8	65.4565	0	19.0614	0	0	0	0	0	0	0	0.452481	3.50311	11.5265	0	0	0	0	0	0
Temperature	790	P	2000
olivine_0	0.228651	(Ca0.00Mg0.08Fe''0.91Mn0.01Co0.00Ni0.00)2SiO4	30.1869	0	0	0	0	66.0096	0.69831	2.98636	0	0	0.118849	0	0	0	0	0	0	0	0
feldspar_0	0.914589	K0.07Na0.65Ca0.28Al1.28Si2.72O8	60.9266	0	24.4239	0	0	0	0	0	0	0	5.93358	7.46704	1.24887	0	0	0	0	0	0
feldspar_1	1.42331	K0.68Na0.30Ca0.02Al1.02Si2.98O8	65.4677	0	19.0306	0	0	0	0	0	0	0	0.424449	3.44745	11.6298	0	0	0	0	0	0
rhm	oxide_0	0.008928	Mn0.00Fe''0.92Mg0.02Fe'''0.11Ti0.94O3	0	49.6614	0	6.0285	0	43.7774	0.0918145	0.440949	0	0	0	0	0	0	0	0	0	0	0
Temperature	780	P	2000
olivine_0	0.188764	(Ca0.00Mg0.07Fe''0.92Mn0.01Co0.00Ni0.00)2SiO4	30.1384	0	0	0	0	66.257	0.713559	2.77777	0	0	0.113328	0	0	0	0	0	0	0	0
feldspar_0	0.87392	K0.07Na0.65Ca0.28Al1.28Si2.72O8	60.9633	0	24.4091	0	0	0	0	0	0	0	5.91278	7.50999	1.20482	0	0	0	0	0	0
feldspar_1	1.36481	K0.68Na0.30Ca0.02Al1.02Si2.98O8	65.4767	0	19.0008	0	0	0	0	0	0	0	0.397733	3.3893	11.7355	0	0	0	0	0	0
rhm	oxide_0	0.039301	Mn0.00Fe''0.93Mg0.02Fe'''0.11Ti0.94O3	0	49.7157	0	5.90178	0	43.8791	0.092519	0.410911	0	0	0	0	0	0	0	0	0	0	0
Temperature	770	P	2000
olivine_0	0.170433	(Ca0.00Mg0.07Fe''0.92Mn0.01Co0.00Ni0.00)2SiO4	30.0937	0	0	0	0	66.4829	0.729646	2.58585	0	0	0.107916	0	0	0	0	0	0	0	0
feldspar_0	0.82919	K0.07Na0.65Ca0.28Al1.28Si2.72O8	61.0052	0	24.3904	0	0	0	0	0	0	0	5.88761	7.55439	1.16238	0	0	0	0	0	0
feldspar_1	1.27406	K0.69Na0.29Ca0.02Al1.02Si2.98O8	65.4845	0	18.9721	0	0	0	0	0	0	0	0.372297	3.33156	11.8395	0	0	0	0	0	0
rhm	oxide_0	0.034837	Mn0.00Fe''0.93Mg0.01Fe'''0.11Ti0.95O3	0	49.7716	0	5.77393	0	43.9781	0.0932776	0.383102	0	0	0	0	0	0	0	0	0	0	0
Temperature	760	P	2000
olivine_0	0.1539	(Ca0.00Mg0.06Fe''0.93Mn0.01Co0.00Ni0.00)2SiO4	30.0526	0	0	0	0	66.6889	0.746623	2.4093	0	0	0.102623	0	0	0	0	0	0	0	0
feldspar_0	0.788459	K0.06Na0.66Ca0.28Al1.28Si2.72O8	61.0522	0	24.368	0	0	0	0	0	0	0	5.85816	7.60023	1.12147	0	0	0	0	0	0
feldspar_1	1.19138	K0.69Na0.29Ca0.02Al1.02Si2.98O8	65.4911	0	18.9447	0	0	0	0	0	0	0	0.348088	3.27417	11.942	0	0	0	0	0	0
rhm	oxide_0	0.030935	Mn0.00Fe''0.93Mg0.01Fe'''0.11Ti0.95O3	0	49.8287	0	5.64528	0	44.0745	0.0940903	0.357362	0	0	0	0	0	0	0	0	0	0	0
Temperature	750	P	2000
olivine_0	0.140937	(Ca0.00Mg0.06Fe''0.93Mn0.01Co0.00Ni0.00)2SiO4	30.0143	0	0	0	0	66.8776	0.765729	2.24498	0	0	0.097384	0	0	0	0	0	0	0	0
feldspar_0	0.775817	K0.06Na0.66Ca0.28Al1.28Si2.72O8	61.111	0	24.337	0	0	0	0	0	0	0	5.81884	7.65018	1.08295	0	0	0	0	0	0
feldspar_1	1.13151	K0.70Na0.28Ca0.02Al1.02Si2.98O8	65.4972	0	18.9184	0	0	0	0	0	0	0	0.325032	3.21894	12.0404	0	0	0	0	0	0
rhm	oxide_0	0.027539	Mn0.00Fe''0.93Mg0.01Fe'''0.10Ti0.95O3	0	49.8874	0	5.51509	0	44.1692	0.0951066	0.333277	0	0	0	0	0	0	0	0	0	0	0
water	0.006444	H2O
Temperature	740	P	2000
olivine_0	0.179458	(Ca0.00Mg0.05Fe''0.94Mn0.01Co0.00Ni0.00)2SiO4	29.9671	0	0	0	0	67.0761	0.824409	2.04207	0	0	0.0902914	0	0	0	0	0	0	0	0
feldspar_0	1.43986	K0.06Na0.67Ca0.27Al1.27Si2.73O8	61.3729	0	24.1629	0	0	0	0	0	0	0	5.61412	7.7772	1.07294	0	0	0	0	0	0
feldspar_1	1.47248	K0.70Na0.28Ca0.01Al1.01Si2.99O8	65.521	0	18.8974	0	0	0	0	0	0	0	0.302156	3.21701	12.0624	0	0	0	0	0	0
rhm	oxide_0	0.024747	Mn0.00Fe''0.94Mg0.01Fe'''0.10Ti0.95O3	0	49.9604	0	5.35339	0	44.2816	0.10095	0.30373	0	0	0	0	0	0	0	0	0	0	0
water	0.19636	H2O
Temperature	730	P	2000
olivine_0	0.15159	(Ca0.00Mg0.05Fe''0.94Mn0.01Co0.00Ni0.00)2SiO4	29.9258	0	0	0	0	67.2395	0.886393	1.86447	0	0	0.083851	0	0	0	0	0	0	0	0
feldspar_0	1.27872	K0.06Na0.68Ca0.26Al1.26Si2.74O8	61.6067	0	24.0085	0	0	0	0	0	0	0	5.43221	7.89362	1.05895	0	0	0	0	0	0
feldspar_1	1.27967	K0.70Na0.28Ca0.01Al1.01Si2.99O8	65.5406	0	18.8764	0	0	0	0	0	0	0	0.280198	3.20547	12.0974	0	0	0	0	0	0
rhm	oxide_0	0.021378	Mn0.00Fe''0.94Mg0.01Fe'''0.10Ti0.95O3	0	50.0331	0	5.19499	0	44.3873	0.106982	0.277672	0	0	0	0	0	0	0	0	0	0	0
water	0.174352	H2O
Temperature	720	P	2000
olivine_0	0.128697	(Ca0.00Mg0.04Fe''0.94Mn0.01Co0.00Ni0.00)2SiO4	29.8896	0	0	0	0	67.3716	0.952166	1.70863	0	0	0.0779764	0	0	0	0	0	0	0	0
feldspar_0	1.144	K0.06Na0.69Ca0.25Al1.25Si2.75O8	61.8169	0	23.8709	0	0	0	0	0	0	0	5.2696	8.00111	1.04155	0	0	0	0	0	0
feldspar_1	1.12365	K0.71Na0.28Ca0.01Al1.01Si2.99O8	65.5563	0	18.8554	0	0	0	0	0	0	0	0.259232	3.18539	12.1437	0	0	0	0	0	0
rhm	oxide_0	0.018641	Mn0.00Fe''0.94Mg0.01Fe'''0.10Ti0.95O3	0	50.1053	0	5.03985	0	44.487	0.11324	0.254646	0	0	0	0	0	0	0	0	0	0	0
water	0.156378	H2O
Temperature	710	P	2000
olivine_0	0.511219	(Ca0.00Mg0.04Fe''0.94Mn0.03Co0.00Ni0.00)2SiO4	29.8178	0	0	0	0	66.7748	1.95178	1.38302	0	0	0.0725302	0	0	0	0	0	0	0	0
feldspar_0	7.58863	K0.05Na0.67Ca0.27Al1.27Si2.73O8	61.2653	0	24.2685	0	0	0	0	0	0	0	5.7263	7.81434	0.925577	0	0	0	0	0	0
feldspar_1	9.23463	K0.73Na0.26Ca0.01Al1.01Si2.99O8	65.4986	0	18.8212	0	0	0	0	0	0	0	0.244452	2.96708	12.4687	0	0	0	0	0	0
quartz	16.4069	SiO2
rhm	oxide_0	0.091982	Mn0.00Fe''0.94Mg0.01Fe'''0.09Ti0.95O3	0	50.1832	0	4.85667	0	44.5215	0.230974	0.207684	0	0	0	0	0	0	0	0	0	0	0
water	1.80276	H2O
Temperature	700	P	2000
olivine_0	0.188814	(Ca0.00Mg0.03Fe''0.91Mn0.06Co0.00Ni0.00)2SiO4	29.7536	0	0	0	0	65.0972	4.01585	1.07621	0	0	0.0571958	0	0	0	0	0	0	0	0
feldspar_0	2.85649	K0.04Na0.64Ca0.32Al1.32Si2.68O8	60.193	0	25.0247	0	0	0	0	0	0	0	6.60046	7.40742	0.77438	0	0	0	0	0	0
feldspar_1	3.73019	K0.75Na0.24Ca0.01Al1.01Si2.99O8	65.4048	0	18.7812	0	0	0	0	0	0	0	0.23339	2.65359	12.9269	0	0	0	0	0	0
quartz	7.22888	SiO2
rhm	oxide_0	0.037101	Mn0.01Fe''0.94Mg0.01Fe'''0.09Ti0.96O3	0	50.2766	0	4.64774	0	44.434	0.478387	0.163262	0	0	0	0	0	0	0	0	0	0	0
water	0.731975	H2O
Phase Masses
Temperature (oC)	Pressure (bars)	liquid_0	olivine_0	clinoamphibole_0	feldspar_0	feldspar_1	quartz	spinel_0	rhm	apatite	water
1100	2000	99.5618	0	0	0	0	0	0	0	0	0
1090	2000	99.5622	0	0	0	0	0	0	0	0	0
1080	2000	99.5626	0	0	0	0	0	0	0	0	0
1070	2000	99.563	0	0	0	0	0	0	0	0	0
1060	2000	99.5634	0	0	0	0	0	0	0	0	0
1050	2000	99.5639	0	0	0	0	0	0	0	0	0
1040	2000	99.5643	0	0	0	0	0	0	0	0	0
1030	2000	99.5648	0	0	0	0	0	0	0	0	0
1020	2000	99.5653	0	0	0	0	0	0	0	0	0
1010	2000	99.5658	0	0	0	0	0	0	0	0	0
1000	2000	99.5664	0	0	0	0	0	0	0	0	0
990	2000	99.5669	0	0	0	0	0	0	0	0	0
980	2000	99.5675	0	0	0	0	0	0	0	0	0
970	2000	99.5682	0	0	0	0	0	0	0	0	0
960	2000	99.5688	0	0	0	0	0	0	0	0	0
950	2000	99.5695	0	0	0	0	0	0	0	0	0
940	2000	99.5702	0	0	0	0	0	0	0	0	0
930	2000	99.5709	0	0	0	0	0	0	0	0	0
920	2000	99.5717	0	0	0	0	0	0	0	0	0
910	2000	99.5725	0	0	0	0	0	0	0	0	0
900	2000	99.5734	0	0	0	0	0	0	0	0	0
890	2000	99.125	0	0	0	0	0	0.460024	0	0	0
880	2000	98.1888	0.92971	0	0	0	0	0	0	0	0
870	2000	97.7774	0.409459	0	0	0	0	0	0	0	0
860	2000	97.3925	0.383021	0	0	0	0	0	0	0	0
850	2000	97.0331	0.357608	0	0	0	0	0	0	0	0
840	2000	92.137	0.365803	0	0.256103	4.27182	0	0	0	0	0
830	2000	88.5543	0.028582	0	1.18745	2.02069	0	0.356046	0	0	0
820	2000	85.4906	0	0	1.02496	1.85429	0	0.192914	0	0	0
810	2000	82.6352	0	0	0.973433	1.7127	0	0.176508	0	0	0
800	2000	79.5857	0.512597	0	1.09557	1.4392	0	0	0	0	0
790	2000	77.011	0.228651	0	0.914589	1.42331	0	0	0.008928	0	0
780	2000	74.5463	0.188764	0	0.87392	1.36481	0	0	0.039301	0	0
770	2000	72.2401	0.170433	0	0.82919	1.27406	0	0	0.034837	0	0
760	2000	70.0778	0.1539	0	0.788459	1.19138	0	0	0.030935	0	0
750	2000	67.998	0.140937	0	0.775817	1.13151	0	0	0.027539	0	0.006444
740	2000	64.6872	0.179458	0	1.43986	1.47248	0	0	0.024747	0	0.19636
730	2000	61.7838	0.15159	0	1.27872	1.27967	0	0	0.021378	0	0.174352
720	2000	59.215	0.128697	0	1.144	1.12365	0	0	0.018641	0	0.156378
710	2000	23.576	0.511219	0	7.58863	9.23463	16.4069	0	0.091982	0	1.80276
700	2000	8.80509	0.188814	0	2.85649	3.73019	7.22888	0	0.037101	0	0.731975
Residual bulk composition
Temperature (oC)	SiO2	TiO2	Al2O3	Fe2O3	FeO	MnO	MgO	CaO	Na2O	K2O	P2O5	H2O
1100	---
1090	---
1080	---
1070	---
1060	---
1050	---
1040	---
1030	---
1020	---
1010	---
1000	---
990	---
980	---
970	---
960	---
950	---
940	---
930	---
920	---
910	---
900	---
890	2.71889e-12	16.9079	2.50282	33.8476	45.9011	0	0.840618	-1.58604e-14	0	0	0	0
880	30.6978	0	7.60988e-14	0	63.3926	0.569007	5.19216	0.148368	0	0	0	0
870	30.6007	0	-1.72789e-13	0	63.9023	0.576608	4.77047	0.149877	0	0	0	0
860	30.5109	0	1.84715e-13	0	64.3725	0.584787	4.38062	0.151204	0	0	0	0
850	30.4278	0	1.97842e-13	0	64.806	0.593609	4.02018	0.152351	0	0	0	0
840	62.5372	0	18.0391	0	4.87614	0.0445587	0.274595	0.830747	3.63937	9.75828	0	0
830	57.1258	1.81442	19.0708	3.12064	5.23382	0.00499439	0.0836166	2.29199	4.47701	6.77692	0	0
820	59.7791	1.1033	19.8375	2.06839	2.94626	0	0.0330904	2.31158	4.62698	7.29379	0	0
810	59.839	1.03527	19.8681	2.12509	2.84992	0	0.0312325	2.32617	4.63282	7.2924	0	0
800	57.8901	0	17.7894	0	11.0529	0.115384	0.544251	2.37665	4.32271	5.90855	0	0
790	60.4959	0.172156	19.1903	0.0208984	6.01209	0.0623143	0.266658	2.35222	4.55685	6.87055	0	0
780	60.1304	0.792069	19.1601	0.0940269	5.76921	0.0560771	0.219107	2.32347	4.5358	6.91974	0	0
770	60.2746	0.751092	19.2313	0.087133	5.57196	0.0552759	0.196689	2.32819	4.55211	6.95167	0	0
760	60.4188	0.712101	19.3024	0.0806766	5.37119	0.0544266	0.176399	2.33264	4.57031	6.98106	0	0
750	60.3923	0.659801	19.3481	0.0729416	5.1108	0.0530864	0.15636	2.35124	4.59955	6.94636	0	0.309482
740	57.4192	0.373191	18.901	0.0399885	3.96424	0.0454118	0.112886	2.57921	4.81	5.82768	0	5.92712
730	57.5366	0.3681	18.8786	0.0382202	3.83441	0.0470298	0.0993112	2.51833	4.88544	5.79369	0	6.00032
720	57.6454	0.363236	18.8597	0.0365362	3.69446	0.048477	0.0873633	2.46162	4.95165	5.77004	0	6.0815
710	76.4872	0.12953	10.0452	0.0125358	1.07284	0.0285956	0.0203762	1.28379	2.43293	3.42821	0	5.0588
700	77.4646	0.12626	9.58074	0.0116719	0.94357	0.0525264	0.0141647	1.33588	2.10226	3.41368	0	4.95467
Bulk compositions
Temperature (oC)	SiO2	TiO2	Al2O3	Fe2O3	FeO	MnO	MgO	CaO	Na2O	K2O	P2O5	H2O
1100	68.5736	0.381634	13.307	0.518298	3.95263	0.080344	0.180774	1.69727	2.99282	4.70013	0.10043	3.51505
1090	68.5734	0.381633	13.3069	0.522021	3.94926	0.0803437	0.180773	1.69726	2.9928	4.70011	0.10043	3.51504
1080	68.5731	0.381631	13.3069	0.525909	3.94575	0.0803434	0.180773	1.69726	2.99279	4.70009	0.100429	3.51503
1070	68.5728	0.38163	13.3068	0.529969	3.94208	0.0803431	0.180772	1.69725	2.99278	4.70007	0.100429	3.51501
1060	68.5726	0.381628	13.3068	0.534206	3.93824	0.0803428	0.180771	1.69724	2.99277	4.70005	0.100428	3.515
1050	68.5722	0.381626	13.3067	0.53863	3.93424	0.0803424	0.18077	1.69723	2.99275	4.70003	0.100428	3.51498
1040	68.5719	0.381625	13.3067	0.543247	3.93007	0.080342	0.18077	1.69723	2.99274	4.70001	0.100428	3.51496
1030	68.5716	0.381623	13.3066	0.548067	3.92571	0.0803417	0.180769	1.69722	2.99273	4.69999	0.100427	3.51495
1020	68.5713	0.381621	13.3065	0.553097	3.92116	0.0803412	0.180768	1.69721	2.99271	4.69996	0.100427	3.51493
1010	68.5709	0.381619	13.3064	0.558346	3.91642	0.0803408	0.180767	1.6972	2.9927	4.69994	0.100426	3.51491
1000	68.5705	0.381617	13.3064	0.563826	3.91146	0.0803404	0.180766	1.69719	2.99268	4.69991	0.100425	3.51489
990	68.5701	0.381615	13.3063	0.569545	3.90629	0.0803399	0.180765	1.69718	2.99266	4.69989	0.100425	3.51487
980	68.5697	0.381612	13.3062	0.575514	3.90089	0.0803394	0.180764	1.69717	2.99264	4.69986	0.100424	3.51485
970	68.5693	0.38161	13.3061	0.581746	3.89526	0.0803389	0.180763	1.69716	2.99263	4.69983	0.100424	3.51483
960	68.5688	0.381607	13.306	0.588253	3.88937	0.0803384	0.180761	1.69715	2.99261	4.6998	0.100423	3.51481
950	68.5684	0.381605	13.306	0.595046	3.88323	0.0803379	0.18076	1.69714	2.99259	4.69977	0.100422	3.51478
940	68.5679	0.381602	13.3059	0.602141	3.87681	0.0803373	0.180759	1.69713	2.99256	4.69973	0.100422	3.51476
930	68.5674	0.381599	13.3058	0.60955	3.87011	0.0803367	0.180758	1.69711	2.99254	4.6997	0.100421	3.51473
920	68.5668	0.381596	13.3057	0.61729	3.86312	0.0803361	0.180756	1.6971	2.99252	4.69966	0.10042	3.5147
910	68.5663	0.381593	13.3056	0.625378	3.8558	0.0803354	0.180755	1.69709	2.99249	4.69962	0.100419	3.51467
900	68.5657	0.38159	13.3054	0.633829	3.84816	0.0803347	0.180753	1.69707	2.99247	4.69958	0.100418	3.51465
890	68.5577	0.381545	13.3039	0.750828	3.74237	0.0803253	0.180732	1.69687	2.99212	4.69903	0.100407	3.51423
880	68.8803	0.305039	13.3549	0.522546	3.61495	0.0807034	0.17769	1.70486	3.0062	4.72115	0.100879	3.53077
870	69.2436	0.307934	13.4816	0.496958	3.07714	0.0760872	0.130265	1.71963	3.03473	4.76595	0.101836	3.56428
860	69.4071	0.30923	13.5383	0.469519	2.8497	0.0739985	0.110884	1.72624	3.04749	4.786	0.102265	3.57927
850	69.5616	0.310451	13.5918	0.442914	2.63406	0.071997	0.0941393	1.73247	3.05953	4.80491	0.102669	3.59341
840	69.7079	0.311603	13.6423	0.409811	2.43692	0.0700825	0.0797135	1.73834	3.07089	4.82273	0.10305	3.60674
830	70.0827	0.328117	13.4077	0.508728	2.23836	0.0714367	0.0693949	1.78642	3.04048	4.56022	0.108511	3.79789
820	70.6035	0.267997	13.1772	0.452637	2.07331	0.0741324	0.0688593	1.76581	2.98204	4.47001	0.112903	3.95161
810	70.9879	0.238165	12.9373	0.444697	1.99753	0.0767899	0.0701449	1.74613	2.9228	4.36831	0.11695	4.09326
800	71.3775	0.210761	12.6981	0.324487	2.02478	0.0794522	0.0715009	1.72616	2.86377	4.26728	0.121005	4.23517
790	71.8952	0.218829	12.5036	0.309384	1.70466	0.0780842	0.0534392	1.70132	2.80802	4.20456	0.125637	4.39729
780	72.2765	0.221028	12.2802	0.294603	1.58404	0.0786196	0.0463518	1.67959	2.7496	4.11545	0.129835	4.54423
770	72.6783	0.202793	12.0528	0.278053	1.46791	0.079374	0.0406767	1.65832	2.69056	4.02271	0.134127	4.69446
760	73.0744	0.185954	11.8236	0.26217	1.35809	0.0801528	0.0357311	1.63694	2.63113	3.92916	0.138409	4.84431
750	73.4649	0.170407	11.5927	0.246599	1.25478	0.0809566	0.0314242	1.61549	2.57129	3.83493	0.142679	4.99377
740	73.8653	0.156149	11.3556	0.221869	1.1654	0.0818202	0.0276355	1.593	2.50927	3.73974	0.147044	5.13721
730	74.7073	0.145801	10.9694	0.204121	1.04817	0.0836961	0.0233049	1.54253	2.39152	3.63288	0.154569	5.09672
720	75.5142	0.13615	10.5977	0.187513	0.940929	0.0854331	0.0197641	1.49667	2.27432	3.53132	0.161832	5.05418
710	76.2966	0.127142	10.2401	0.0756346	0.929943	0.0870601	0.0168627	1.45493	2.15835	3.43449	0.168867	5.00998
700	76.0113	0.125646	10.5355	0.0615884	0.817224	0.175506	0.0116181	1.71369	1.74359	3.44419	0.424072	4.93609
